# Supplementary material for: Predicting the effect of framework and hydrocarbon structure on the zeolite-catalyzed beta-scission
Source: Royal Society of Chemistry journal article supplement (doi:10.1039/d4cy00973h), 2024-01-01
Supplement: d4cy00973h1.pdf [file d4cy00973h1.pdf]

## **Predicting the Effect of Framework and Hydrocarbon Structure on The Zeolite-Catalyzed Beta-Scission**

Yannick Ureel<sup>1</sup>, Konstantinos Alexopoulos<sup>2,\*</sup>, Kevin M. Van Geem<sup>1</sup>, Maarten K. Sabbe<sup>1,\*</sup>

<sup>1</sup>Laboratory of Chemical Technology, Department of Materials, Textiles and Chemical Engineering, Ghent University, Technologiepark 125, 9052 Gent, Belgium

<sup>2</sup>Department of Chemical Engineering, Pennsylvania State University, University Park, Pennsylvania 16802-1503, United States

\* Corresponding authors: [Maarten.Sabbe@UGent.be](mailto:Maarten.Sabbe@UGent.be), Technologiepark 125, 9052 Gent, Belgium; [kxa5325@psu.edu](mailto:kxa5325@psu.edu), University Park, Pennsylvania 16802-1503, United States;

## **Supporting Information**

## S1. Calculated Activation Enthalpy ( $\Delta^\ddagger H$ ) and Activation Entropy ( $\Delta^\ddagger S$ )

Table S1. Calculated activation enthalpies and entropies of all studied hydrocarbons and zeolites in this work, with the obtained pore-confinement descriptor.

| Zeolite topology | Name $\beta$ -scission reactant | $\Delta^\ddagger H$<br>(kJ.mol <sup>-1</sup> ) | $\Delta^\ddagger S$<br>(J.K <sup>-1</sup> .mol <sup>-1</sup> ) | $\Delta(\Sigma d^{-1})$<br>(Å <sup>-1</sup> ) |
|------------------|---------------------------------|------------------------------------------------|----------------------------------------------------------------|-----------------------------------------------|
| FAU              | Hex-2-ylium                     | 67.04                                          | -27.91                                                         | -1.300                                        |
| FAU              | Hept-2-ylium                    | 69.19                                          | -4.30                                                          | -2.012                                        |
| FAU              | Oct-2-ylium                     | 61.32                                          | -15.68                                                         | -2.701                                        |
| FAU              | Non-2-ylium                     | 68.61                                          | -19.53                                                         | -3.204                                        |
| FAU              | Dec-2-ylium                     | 70.45                                          | -22.83                                                         | -1.949                                        |
| FAU              | Undec-2-ylium                   | 81.53                                          | -14.83                                                         | -1.408                                        |
| FAU              | Dodec-2-ylium                   | 88.49                                          | -17.60                                                         | -0.758                                        |
| FAU              | Hex-1-ene-5-ylium               | 39.51                                          | -40.45                                                         | -2.052                                        |
| FAU              | Hept-1-ene-6-ylium              | 68.90                                          | -16.91                                                         | -1.865                                        |
| FAU              | Oct-1-ene-7-ylium               | 72.19                                          | -21.42                                                         | -2.518                                        |
| FAU              | Non-1-ene-8-ylium               | 74.36                                          | -15.17                                                         | -2.805                                        |
| FAU              | Dec-1-ene-9-ylium               | 70.34                                          | -22.82                                                         | -1.481                                        |
| FAU              | Undec-1-ene-10-ylium            | 76.38                                          | -8.53                                                          | -0.780                                        |
| FAU              | Dodec-1-ene-11-ylium            | 73.90                                          | -27.45                                                         | -0.743                                        |
| FAU              | 2,3,4-trimethylpent-2-ylium     | 55.93                                          | 2.99                                                           | -1.001                                        |
| FAU              | 2,3,4-trimethylhex-2-ylium      | 60.99                                          | 16.44                                                          | -1.424                                        |
| FAU              | 2,3,4-trimethylhept-2-ylium     | 60.79                                          | 15.46                                                          | -1.871                                        |
| FAU              | 2,4,6-trimethylhept-2-ylium     | 76.54                                          | 17.14                                                          | -2.842                                        |
| FAU              | 2,4,6-trimethylnon-2-ylium      | 83.43                                          | 11.20                                                          | -1.002                                        |
| FAU              | 2,4-dimethylpent-2-ylium        | 77.07                                          | -21.43                                                         | -1.045                                        |
| FAU              | 2,4-dimethylhex-2-ylium         | 70.59                                          | -26.02                                                         | -1.496                                        |
| FAU              | 2,4-dimethylhept-2-ylium        | 73.28                                          | -19.94                                                         | -2.823                                        |
| FAU              | 2,4-dimethylnon-2-ylium         | 80.67                                          | 0.18                                                           | -1.300                                        |
| MFI              | Hex-2-ylium                     | 112.90                                         | 16.01                                                          | 0.120                                         |
| MFI              | Hept-2-ylium                    | 111.39                                         | 37.37                                                          | 0.138                                         |
| MFI              | Oct-2-ylium                     | 107.53                                         | 43.42                                                          | 0.269                                         |
| MFI              | Non-2-ylium                     | 112.33                                         | 29.04                                                          | 0.326                                         |
| MFI              | Dec-2-ylium                     | 118.61                                         | 14.91                                                          | 0.432                                         |
| MFI              | Undec-2-ylium                   | 118.13                                         | 5.90                                                           | 0.621                                         |
| MFI              | Dodec-2-ylium                   | 126.29                                         | 7.28                                                           | 0.763                                         |
| MFI              | Hex-1-ene-5-ylium               | 74.09                                          | 17.54                                                          | 0.173                                         |
| MFI              | Hept-1-ene-6-ylium              | 123.42                                         | 33.25                                                          | 0.256                                         |
| MFI              | Oct-1-ene-7-ylium               | 120.57                                         | 10.44                                                          | 0.329                                         |
| MFI              | Non-1-ene-8-ylium               | 122.76                                         | 18.42                                                          | 0.525                                         |
| MFI              | Dec-1-ene-9-ylium               | 110.34                                         | 22.28                                                          | 0.536                                         |
| MFI              | Undec-1-ene-10-ylium            | 117.74                                         | 30.56                                                          | 0.718                                         |
| MFI              | Dodec-1-ene-11-ylium            | 110.52                                         | 27.45                                                          | -0.103                                        |

|     |                            |        |        |        |
|-----|----------------------------|--------|--------|--------|
| MFI | 2,3,4-trimethylpent-2-ylum | 121.62 | 28.19  | -0.188 |
| MFI | 2,3,4-trimethylhex-2-ylum  | 98.50  | 10.78  | -0.342 |
| MFI | 2,3,4-trimethylhept-2-ylum | 97.16  | 11.52  | -0.340 |
| MFI | 2,4,6-trimethylhept-2-ylum | 99.77  | 17.49  | -0.902 |
| MFI | 2,4,6-trimethylnon-2-ylum  | 95.23  | 4.00   | -0.033 |
| MFI | 2,4-dimethylpent-2-ylum    | 112.81 | 24.22  | -0.167 |
| MFI | 2,4-dimethylhex-2-ylum     | 107.97 | 16.99  | -0.369 |
| MFI | 2,4-dimethylhept-2-ylum    | 103.04 | 19.12  | -0.872 |
| MFI | 2,4-dimethylnon-2-ylum     | 88.26  | 4.56   | 0.120  |
| MOR | Hex-2-ylum                 | 72.55  | -16.32 | 0.158  |
| MOR | Hept-2-ylum                | 70.27  | -23.76 | 0.486  |
| MOR | Oct-2-ylum                 | 72.71  | -29.65 | 0.733  |
| MOR | Non-2-ylum                 | 73.60  | -25.05 | 0.996  |
| MOR | Dec-2-ylum                 | 74.23  | -20.64 | 1.262  |
| MOR | Undec-2-ylum               | 75.79  | -17.45 | 1.516  |
| MOR | Dodec-2-ylum               | 77.28  | -15.97 | 1.530  |
| MOR | Hex-1-ene-5-ylum           | 47.62  | -13.62 | 0.476  |
| MOR | Hept-1-ene-6-ylum          | 79.13  | -4.83  | 0.668  |
| MOR | Oct-1-ene-7-ylum           | 77.11  | -16.22 | 0.988  |
| MOR | Non-1-ene-8-ylum           | 72.39  | -27.26 | 1.192  |
| MOR | Dec-1-ene-9-ylum           | 70.86  | 0.66   | 1.503  |
| MOR | Undec-1-ene-10-ylum        | 73.20  | -23.93 | 1.595  |
| MOR | Dodec-1-ene-11-ylum        | 71.74  | -12.19 | 0.528  |
| MOR | 2,3,4-trimethylpent-2-ylum | 86.30  | 5.72   | 0.674  |
| MOR | 2,3,4-trimethylhex-2-ylum  | 81.77  | -10.16 | 0.875  |
| MOR | 2,3,4-trimethylhept-2-ylum | 89.17  | -17.48 | 0.911  |
| MOR | 2,4,6-trimethylhept-2-ylum | 158.73 | 18.92  | 1.362  |
| MOR | 2,4,6-trimethylnon-2-ylum  | 163.39 | 14.53  | 0.563  |
| MOR | 2,4-dimethylpent-2-ylum    | 112.31 | 13.16  | 0.738  |
| MOR | 2,4-dimethylhex-2-ylum     | 114.91 | 8.81   | 0.970  |
| MOR | 2,4-dimethylhept-2-ylum    | 120.66 | 3.72   | 1.462  |
| MOR | 2,4-dimethylnon-2-ylum     | 126.27 | 17.03  | 0.158  |
| TON | Hex-2-ylum                 | 77.86  | -21.16 | -0.213 |
| TON | Hept-2-ylum                | 88.38  | -28.02 | -0.265 |
| TON | Oct-2-ylum                 | 106.57 | -24.69 | -0.350 |
| TON | Non-2-ylum                 | 102.62 | -16.32 | -0.442 |
| TON | Dec-2-ylum                 | 99.79  | -16.76 | -0.590 |
| TON | Undec-2-ylum               | 102.31 | -6.69  | -0.674 |
| TON | Dodec-2-ylum               | 107.09 | -15.84 | -0.603 |
| TON | Hex-1-ene-5-ylum           | 49.81  | -27.69 | -0.309 |
| TON | Hept-1-ene-6-ylum          | 92.45  | -17.81 | -0.403 |
| TON | Oct-1-ene-7-ylum           | 96.74  | -20.33 | -0.440 |
| TON | Non-1-ene-8-ylum           | 104.18 | -17.74 | -0.588 |
| TON | Dec-1-ene-9-ylum           | 103.20 | -29.59 | -0.699 |
| TON | Undec-1-ene-10-ylum        | 108.42 | -20.21 | -0.714 |
| TON | Dodec-1-ene-11-ylum        | 109.68 | -16.04 | 0.196  |
| TON | 2,3,4-trimethylpent-2-ylum | 127.34 | -0.81  | 0.224  |

|     |                            |        |        |        |
|-----|----------------------------|--------|--------|--------|
| TON | 2,3,4-trimethylhex-2-ylum  | 142.30 | -33.49 | 0.292  |
| TON | 2,3,4-trimethylhept-2-ylum | 182.20 | -20.27 | 0.255  |
| TON | 2,4,6-trimethylhept-2-ylum | 175.07 | -33.47 | 0.417  |
| TON | 2,4,6-trimethylnon-2-ylum  | 159.46 | -30.35 | 0.016  |
| TON | 2,4-dimethylpent-2-ylum    | 164.71 | -22.91 | 0.110  |
| TON | 2,4-dimethylhex-2-ylum     | 169.06 | -25.67 | 0.211  |
| TON | 2,4-dimethylhept-2-ylum    | 181.20 | -31.33 | 0.270  |
| TON | 2,4-dimethylnon-2-ylum     | 188.34 | -43.31 | -0.213 |

---

## S2. Zeolite Frameworks

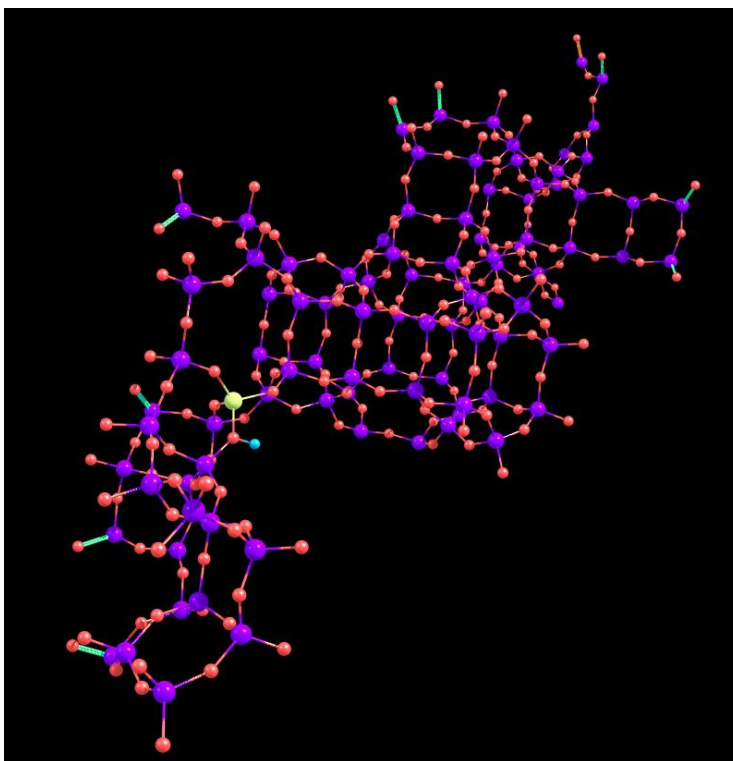

Figure S1. Illustrative FAU unit cell

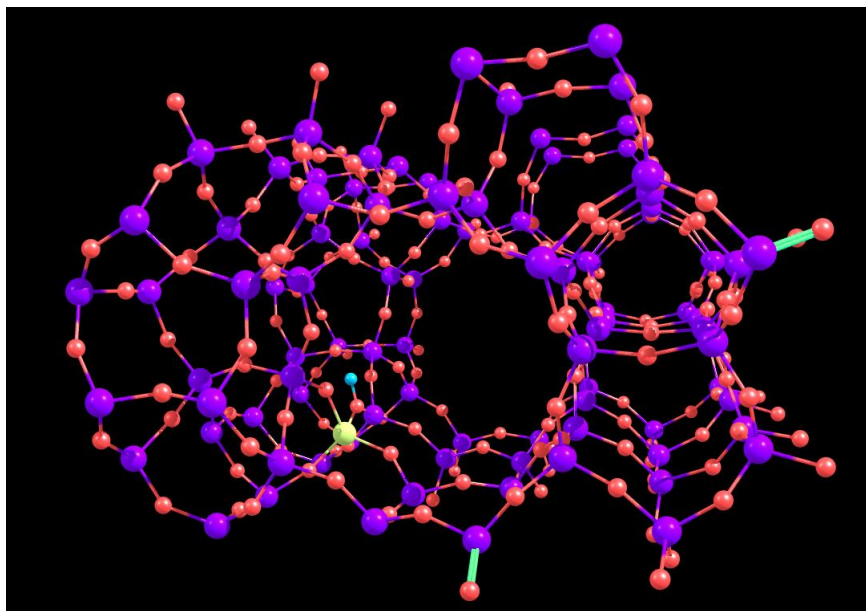

Figure S2. Illustrative MFI unit cell

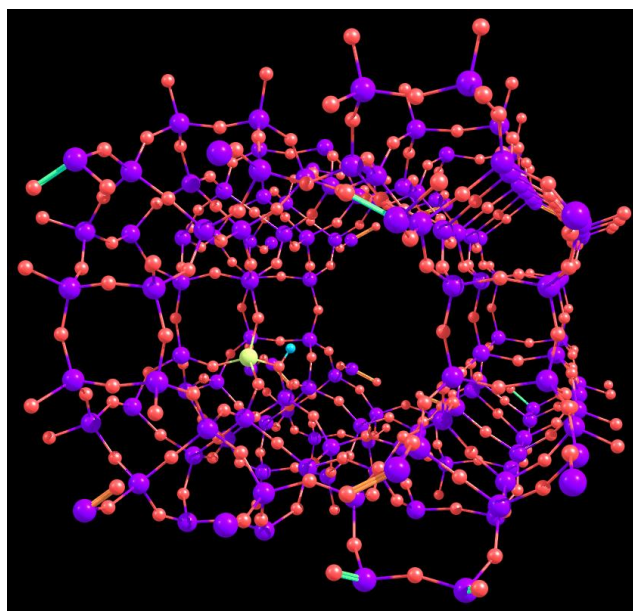

Figure S3. Illustrative MOR unit cell

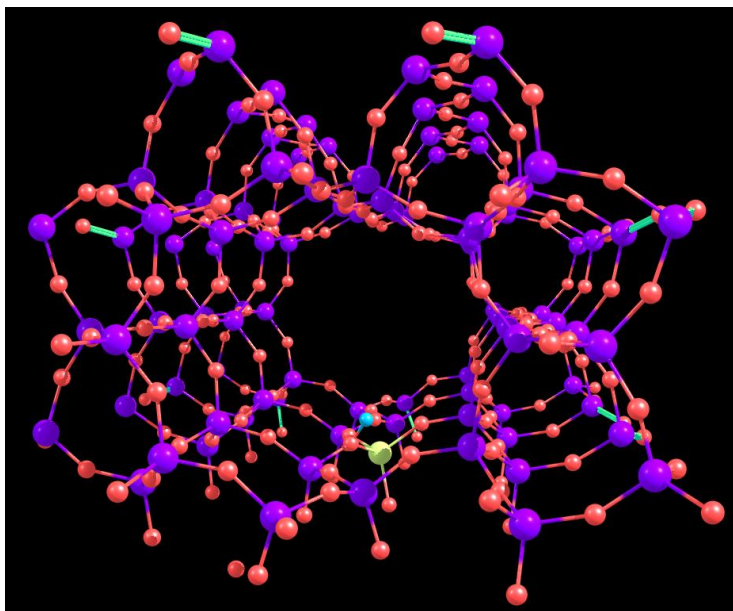

Figure S4. Illustrative TON unit cell

### S3. FAU Correlation Linear Hydrocarbons

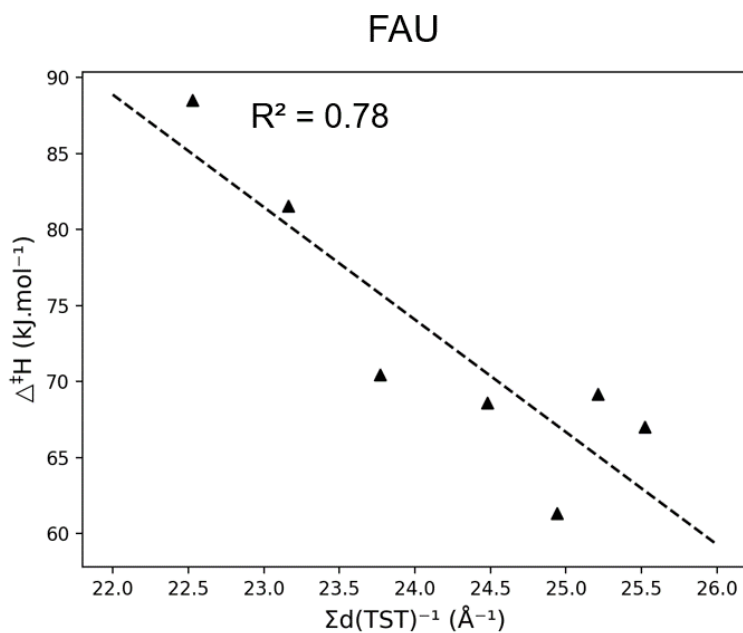

Figure S5. Correlation between the activation enthalpy ( $\Delta^{\ddagger}H$ ) and the stabilization descriptor of the transition state  $\Sigma d(\text{TST})^{-1}$  for linear carbenium ions, together with the  $R^2$ -value.

#### S4. 95%-Confidence Interval Slope and Intercept of Correlation with Pore Confinement Descriptor

Table S2. Intercepts and slopes of correlation between activation enthalpy and pore confinement descriptor of the linear carbenium ions (depicted in Figure 3) with 95%-confidence intervals.

|     | Intercept       | Slope            |
|-----|-----------------|------------------|
| FAU | $87.5 \pm 18.2$ | $-8.0 \pm 7.2$   |
| MFI | $107.0 \pm 6.8$ | $-21.9 \pm 15.4$ |
| MOR | $70.2 \pm 2.8$  | $3.7 \pm 2.7$    |
| TON | $74.0 \pm 15.1$ | $49.0 \pm 31.6$  |

Table S3. Intercepts and slopes of correlation between activation enthalpy and pore confinement descriptor of the branched carbenium ions (depicted in Figure 5) with 95%-confidence intervals.

|     | Intercept        | Slope            |
|-----|------------------|------------------|
| FAU | $69.3 \pm 18.5$  | $3.8 \pm 10.5$   |
| MFI | $113.4 \pm 1.8$  | $28.8 \pm 3.7$   |
| MOR | $103.9 \pm 8.0$  | $15.7 \pm 8.0$   |
| TON | $151.3 \pm 10.0$ | $-95.3 \pm 55.2$ |

## S5. Activation Enthalpy Unsaturated Hydrocarbons

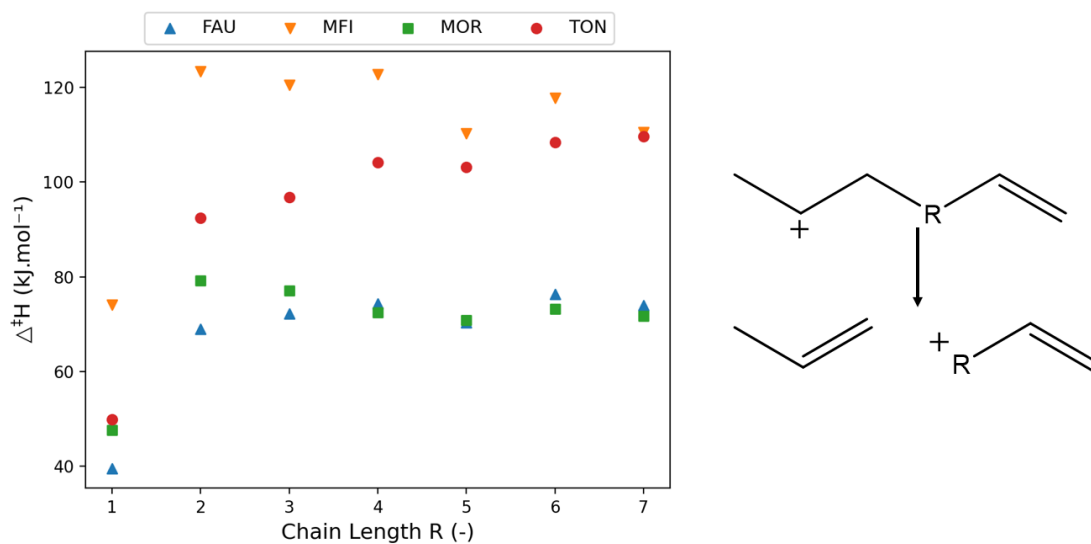

Figure S6. The variation of activation enthalpy ( $\Delta^\ddagger H$ ) with increasing chain length of branched components (left) or the depicted reaction template (right).

## S6. TON Position Unsaturated

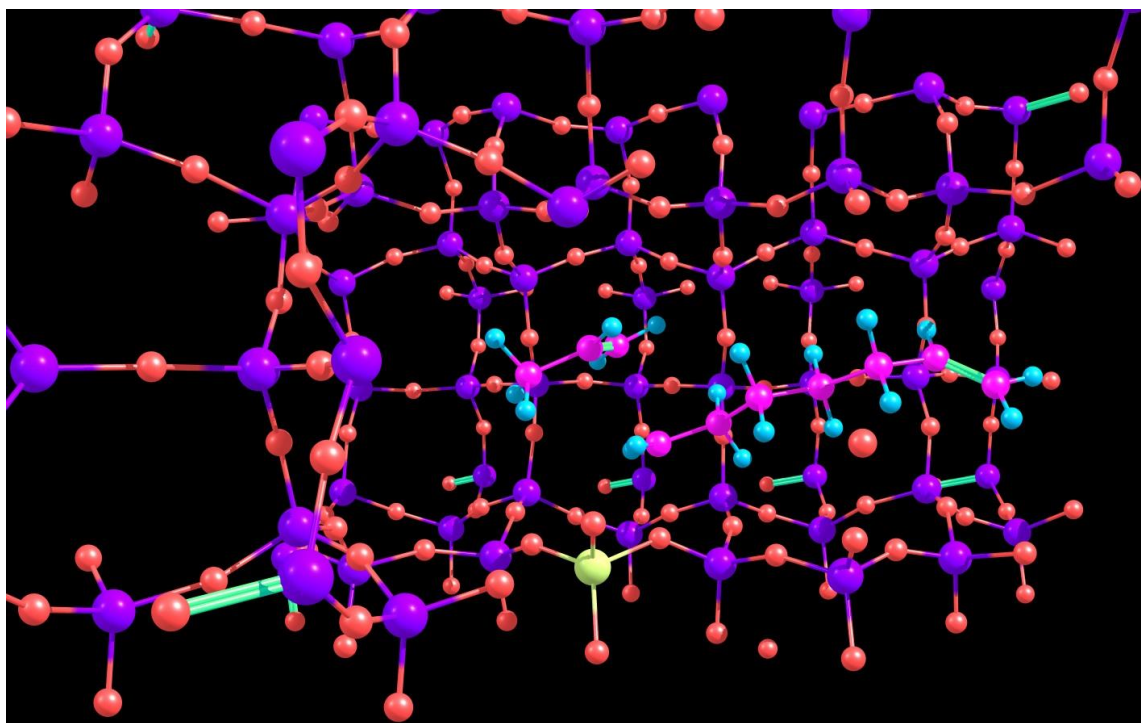

Figure S7. Geometry of the dec-1-ene-9-ylum transition state in TON-framework. Some silicon and oxygen atoms of the TON framework have been removed for visibility.



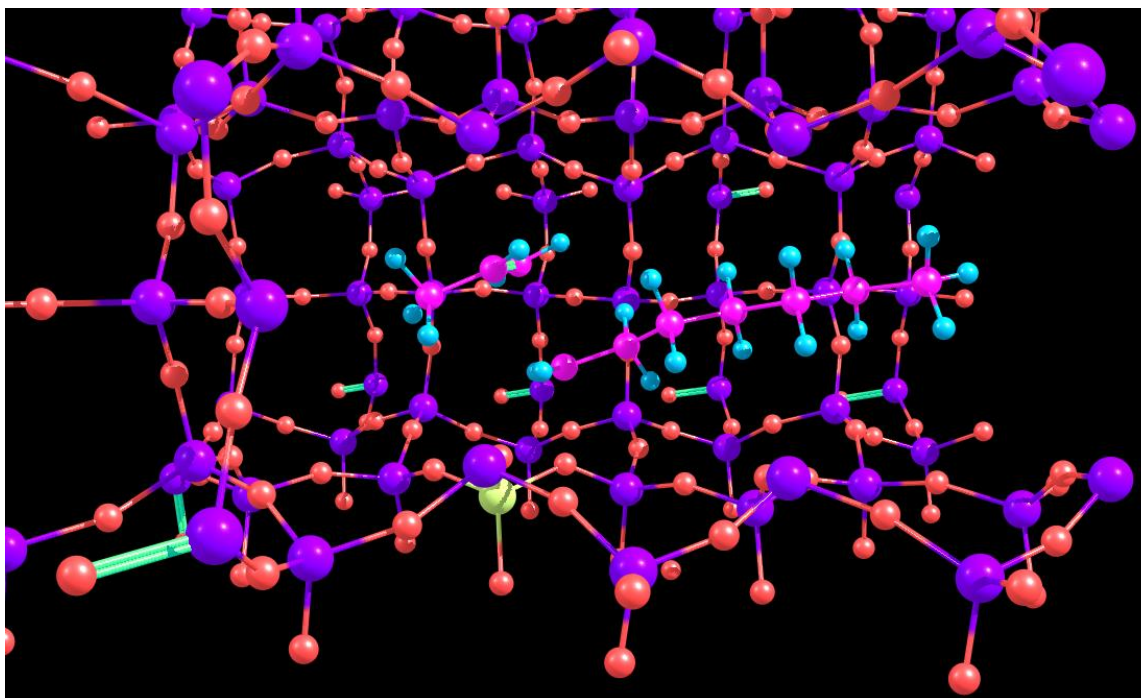

Figure S8. Geometry of the dec-2-ylum transition state in TON-framework. Some silicon and oxygen atoms of the TON framework have been removed for visibility.

S7. MFI Position 2,3,4-trimethylpent-2-ylum

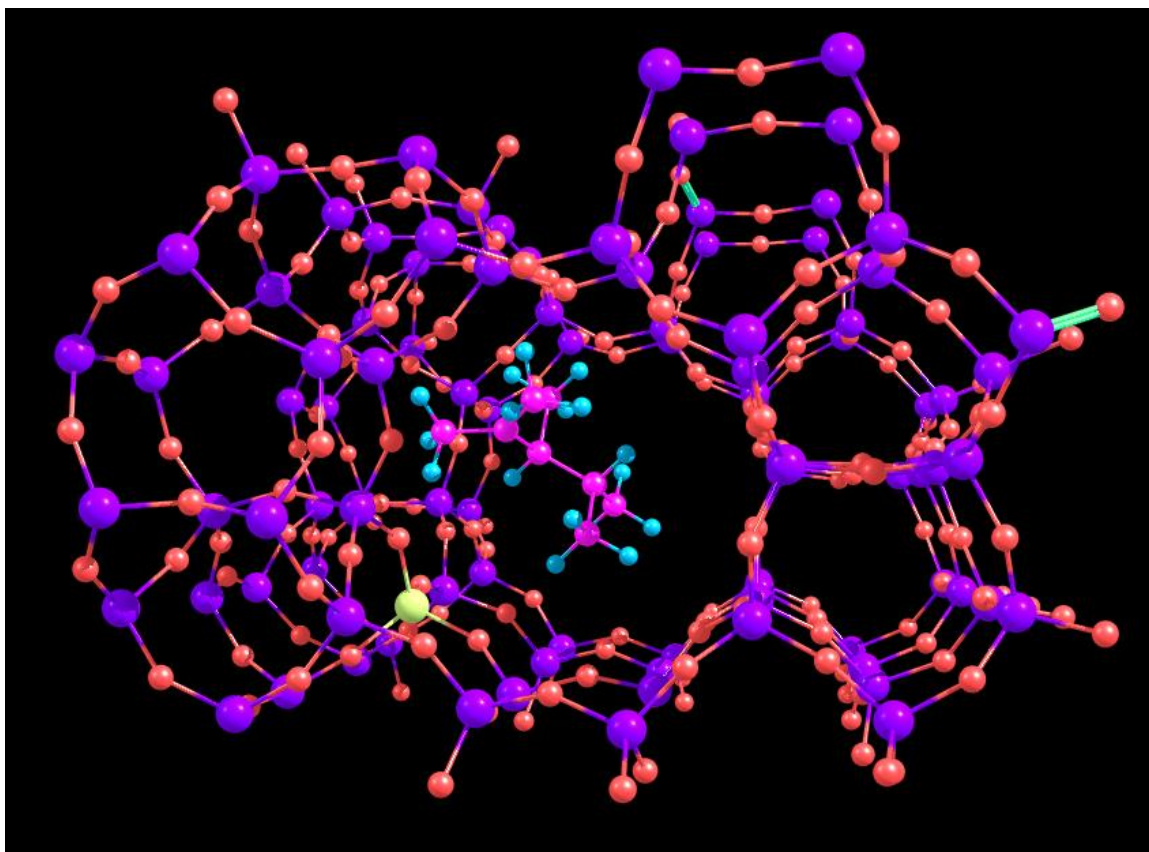

Figure S9. Geometry of the 2,3,4-trimethylpent-2-ylum in MFI indicating the “perfect fit”.

## S8. Correlation Pore Stabilization Descriptor Unsaturated Hydrocarbons

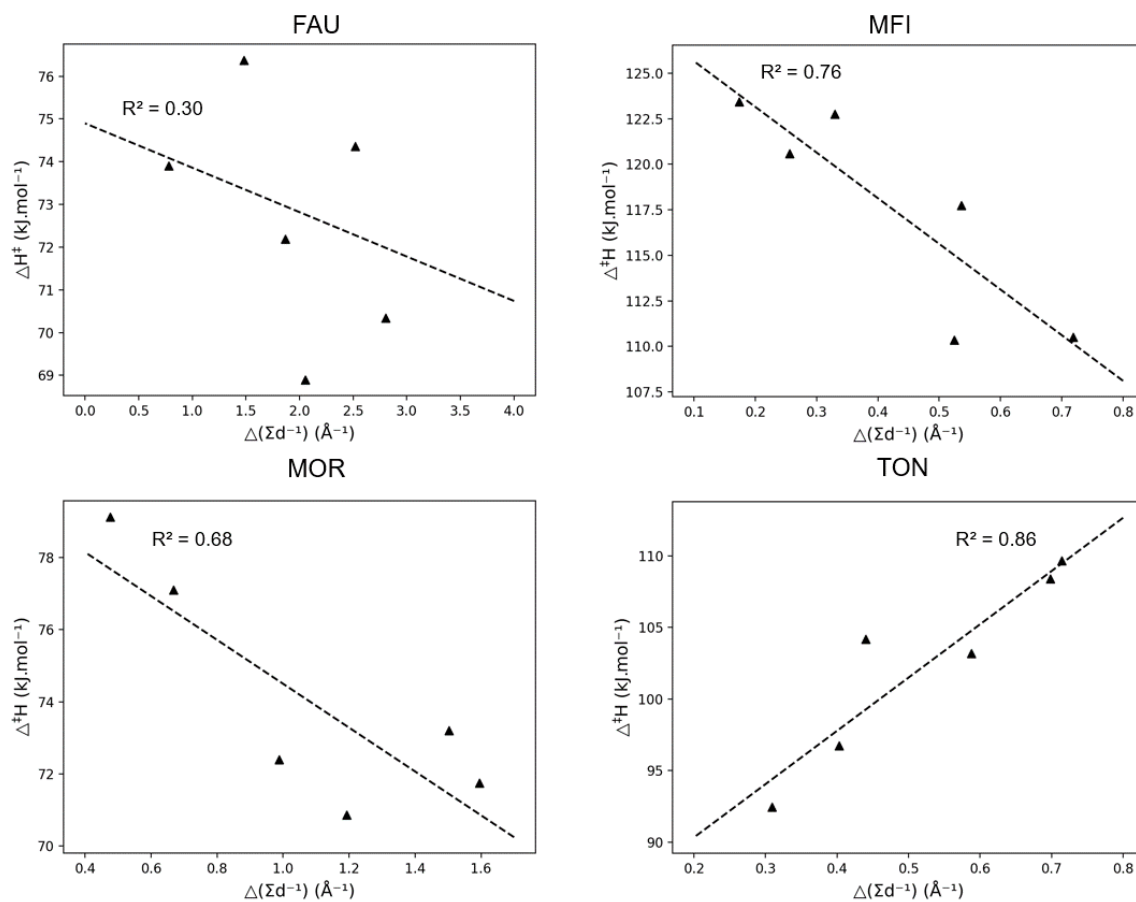

Figure S10. Correlation between the activation enthalpy ( $\Delta^\ddagger H$ ) and the pore stabilization descriptor  $\Delta(\Sigma d^{-1})$  for unsaturated carbenium ions, together with the  $R^2$ -value.

## S9. Correlation Pore Stabilization Descriptor Branched Hydrocarbons

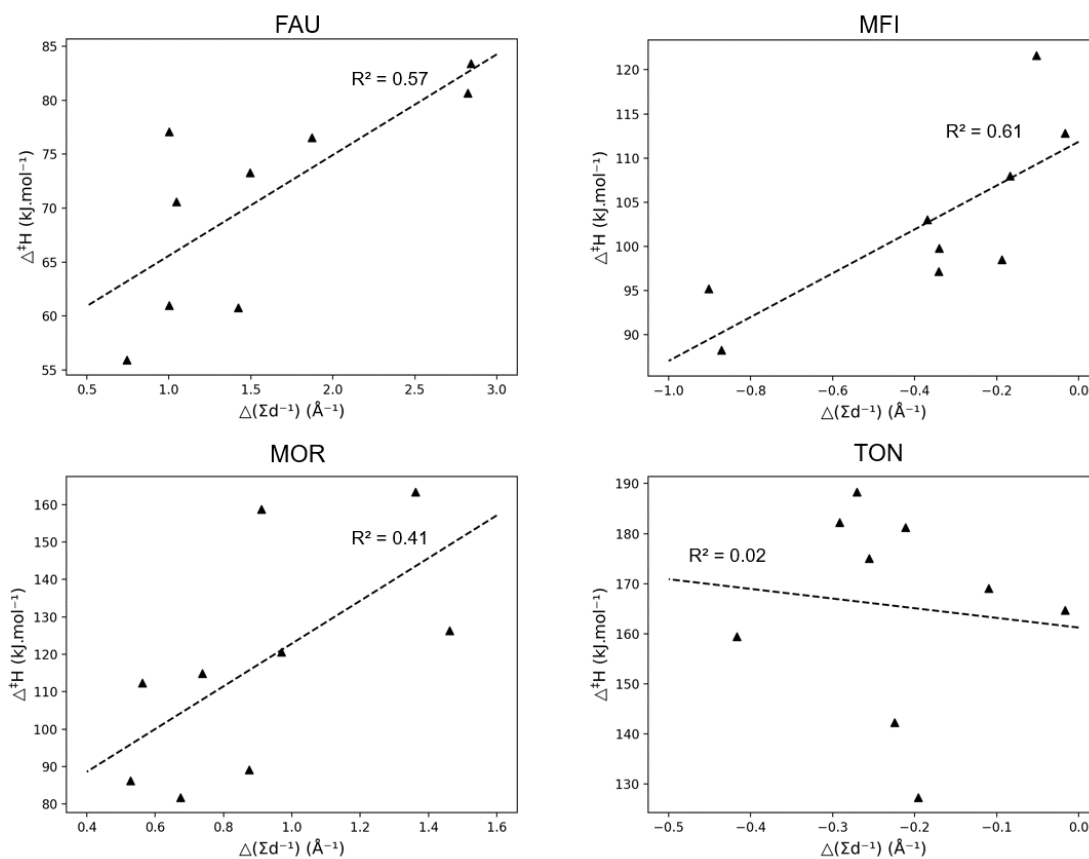

Figure S11. Correlation between the activation enthalpy ( $\Delta^\ddagger H$ ) and the pore stabilization descriptor  $\Delta(\Sigma d^{-1})$  for branched carbenium ions, together with the  $R^2$ -value.

## S10. Correlation Pore Stabilization Descriptor All Hydrocarbons

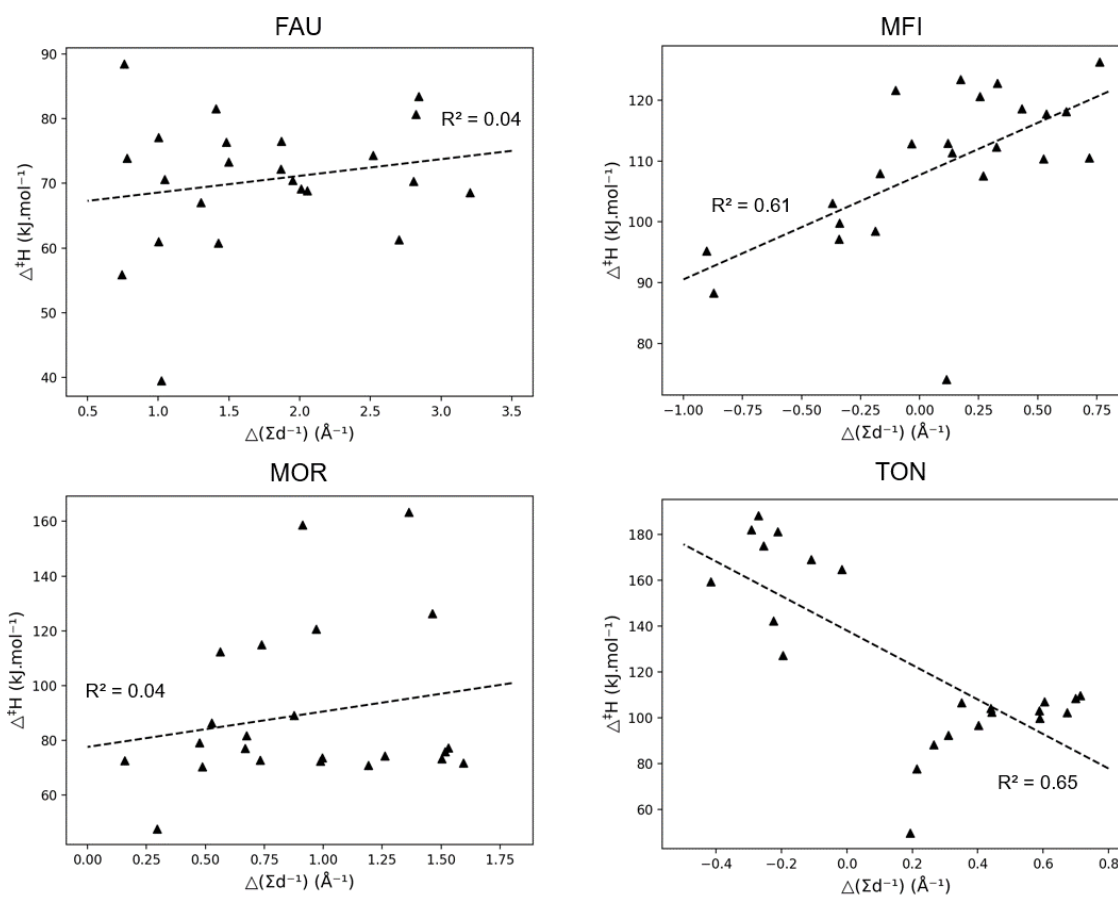

Figure S12. Correlation between the activation enthalpy ( $\Delta^\ddagger H$ ) and the pore stabilization descriptor  $\Delta(\Sigma d^{-1})$  for all carbenium ions, together with the  $R^2$ -value.

## S11. Group Additive Values

Table S4. Group additive values for kinetic group additive model for FAU and TON, excluding the pore stabilization descriptor coefficient for MFI and MOR.

| $\Delta^\ddagger H$<br>( $\text{kJ}\cdot\text{mol}^{-1}$ ) | a     | $C_{R1}$ | $C_{R2}$ | $C_{R3}$ | $C_{R4}$ | $C_{DB}$ |
|------------------------------------------------------------|-------|----------|----------|----------|----------|----------|
| FAU                                                        | 72.4  | 2.3      | -17.7    | 0        | 2.3      | 0.3      |
| MFI                                                        | 115.3 | -7.0     | 4.6      | 0        | -7.0     | 2.2      |
| MOR                                                        | 73.8  | 29.9     | -47.0    | 0        | 29.9     | 0.3      |
| TON                                                        | 75.2  | 37.6     | -22.4    | 0        | 37.6     | 4.6      |

Table S5. Group additive values for modified group additive model for FAU and TON, excluding the pore stabilization descriptor coefficient for MFI and MOR.

| $\Delta^\ddagger H$<br>(kJ.mol <sup>-1</sup> ) | a     | C <sub>R1</sub> | C <sub>R2</sub> | C <sub>R3</sub> | C <sub>R4</sub> | C <sub>DB</sub> |
|------------------------------------------------|-------|-----------------|-----------------|-----------------|-----------------|-----------------|
| FAU                                            | 60.2  | 4.5             | -14.9           | 2.4             | 4.5             | -0.9            |
| MFI                                            | 121.1 | -8.2            | 3.2             | -1.2            | -8.2            | 2.8             |
| MOR                                            | 64.5  | 31.2            | -44.8           | 1.9             | 31.1            | -0.6            |
| TON                                            | 77.3  | 41.4            | -17.6           | 4.1             | 41.3            | 2.6             |

## S12. Optimized Reactant and Transition State Geometries

POSCAR geometries of the reference structures for all zeolites which offer a basis for the start of the molecular mechanics calculations.

| Hex-2-ylum (FAU)    |                     |                     |   |   |                     |                    |                     |
|---------------------|---------------------|---------------------|---|---|---------------------|--------------------|---------------------|
| Si                  | O                   | Al                  | H | C |                     |                    |                     |
| 1.0000000000000000  |                     |                     |   |   | 0.0812831831156132  | 0.0173886419893669 | 0.9124699964914920  |
| 17.4005000000000010 | 0.0000000000000000  | 0.0000000000000000  |   |   | 0.4375615222540404  | 0.3769007369936861 | 0.2334085664499367  |
| 8.7151432720031057  | 15.0162842993351386 | 0.0000000000000000  |   |   | 0.4377539990294281  | 0.3812134061728474 | 0.7315658092417254  |
| 17.5186242368413545 | 10.0514156204086493 | 28.3978170589599976 |   |   | 0.6173529725192807  | 0.1972495268275546 | 0.3216628011740035  |
|                     |                     |                     |   |   | 0.6180552457598351  | 0.1976621638386128 | 0.8215308733786496  |
|                     |                     |                     |   |   | 0.2588161573356770  | 0.8408151721277697 | 0.0014190102657114  |
|                     |                     |                     |   |   | 0.2578605861494676  | 0.8402404608095796 | 0.5009789519180909  |
|                     |                     |                     |   |   | 0.4383350552202674  | 0.8414217232331858 | 0.0010261081404698  |
|                     |                     |                     |   |   | 0.4375051119102711  | 0.8406201488008308 | 0.5006967380383989  |
|                     |                     |                     |   |   | 0.0808469038516457  | 0.1970004588831495 | 0.3217803719417210  |
|                     |                     |                     |   |   | 0.0815067374691106  | 0.1969652118810570 | 0.8224424496820036  |
|                     |                     |                     |   |   | 0.2583743406934136  | 0.3757984445516639 | 0.2333760764491470  |
|                     |                     |                     |   |   | 0.2591838894416812  | 0.3754989286714007 | 0.7327732309030666  |
|                     |                     |                     |   |   | 0.6175691031247238  | 0.0168425026812068 | 0.4118706602320322  |
|                     |                     |                     |   |   | 0.6193754157438872  | 0.0172458623439511 | 0.9113814110898630  |
|                     |                     |                     |   |   | 0.6172188148982156  | 0.1972204766844604 | 0.2334293162106645  |
|                     |                     |                     |   |   | 0.6178464036983093  | 0.2000014200594942 | 0.7330198244184732  |
|                     |                     |                     |   |   | 0.3305312576986276  | 0.2689413300761869 | 0.0371190949612261  |
|                     |                     |                     |   |   | 0.32958959061581988 | 0.2674507254477151 | 0.5373248334961699  |
|                     |                     |                     |   |   | 0.2579317659765868  | 0.8403351781208530 | 0.411683176958244   |
|                     |                     |                     |   |   | 0.2588500947472651  | 0.8408372236595151 | 0.9121167243545106  |
|                     |                     |                     |   |   | 0.0810696898722611  | 0.0171365706266628 | 0.0017632000844705  |
|                     |                     |                     |   |   | 0.0803260213862705  | 0.0173385869127067 | 0.5011518866578688  |
|                     |                     |                     |   |   | 0.0812179857395326  | 0.3759264249052487 | 0.4114566057948881  |
|                     |                     |                     |   |   | 0.0810557927744143  | 0.3752917652627046 | 0.9125197893742356  |
|                     |                     |                     |   |   | 0.4382094768756088  | 0.0171778441623272 | 0.2331522671782073  |
|                     |                     |                     |   |   | 0.4384509361951313  | 0.0167735343433429 | 0.733238568168484   |
|                     |                     |                     |   |   | 0.6164079986537425  | 0.840562045300751  | 0.3216005235663267  |
|                     |                     |                     |   |   | 0.6183557956867178  | 0.841571394920228  | 0.8218350488947985  |
|                     |                     |                     |   |   | 0.25848242444174795 | 0.1990255533638591 | 0.000861032829238   |
|                     |                     |                     |   |   | 0.2578358941970738  | 0.1968841942484597 | 0.5011831671671223  |
|                     |                     |                     |   |   | 0.5085212221817725  | 0.4480282168053548 | 0.3578083662007203  |
|                     |                     |                     |   |   | 0.5104258482428821  | 0.4493741710776504 | 0.8565140561239135  |
|                     |                     |                     |   |   | 0.8662521896390155  | 0.0888789445571805 | 0.0371199076643156  |
|                     |                     |                     |   |   | 0.8655832956000921  | 0.0885307882932011 | 0.5373525323502483  |
|                     |                     |                     |   |   | 0.689184835132438   | 0.268401885950180  | 0.1260571766928614  |
|                     |                     |                     |   |   | 0.6894267580259326  | 0.2684216299099850 | 0.6255765735905601  |
|                     |                     |                     |   |   | 0.6890507439941237  | 0.6251545744833570 | 0.3571813848893688  |
|                     |                     |                     |   |   | 0.6915263673013882  | 0.6265088445769282 | 0.8577860266807819  |
|                     |                     |                     |   |   | 0.4380206192364390  | 0.3768260554195372 | 0.3215535182703969  |
|                     |                     |                     |   |   | 0.6150046997439717  | 0.0855961506276520 | 0.1120425941857596  |
|                     |                     |                     |   |   | 0.6141656571157880  | 0.0855083350355853 | 0.6121506144294516  |
|                     |                     |                     |   |   | 0.3256730137403058  | 0.3734182650186325 | 0.5002110960728432  |
|                     |                     |                     |   |   | 0.6144135118417512  | 0.5974431785688843 | 0.3557731870140441  |
|                     |                     |                     |   |   | 0.6176977726457791  | 0.6005933197407878 | 0.8553053766004093  |
|                     |                     |                     |   |   | 0.5078516653237567  | 0.851164400829912  | 0.4463492058276824  |
|                     |                     |                     |   |   | 0.5090683901306179  | 0.8496512077578718 | 0.9468632854290898  |
|                     |                     |                     |   |   | 0.0899514572449089  | 0.2674649985985746 | 0.3362358575370019  |
|                     |                     |                     |   |   | 0.0923949874908555  | 0.2668135261961321 | 0.8364866307445439  |
|                     |                     |                     |   |   | 0.2871106482302443  | 0.2669869272600589 | 0.238105560100235   |
|                     |                     |                     |   |   | 0.2867737248108136  | 0.2671728350598835 | 0.7369476531253779  |
|                     |                     |                     |   |   | 0.5093144475376502  | 0.0453082263884562 | 0.4476710178873436  |
|                     |                     |                     |   |   | 0.5102162966082910  | 0.0472210363096186 | 0.946365684909188   |
|                     |                     |                     |   |   | 0.5086906161330771  | 0.2682424443932933 | 0.2383002112842743  |
|                     |                     |                     |   |   | 0.5103936426892611  | 0.2722268403153436 | 0.7369781006933556  |
|                     |                     |                     |   |   | 0.2874560217021068  | 0.8487566687862313 | 0.4468184362974504  |
|                     |                     |                     |   |   | 0.2880029794792631  | 0.849585885161281  | 0.947160770343767   |
|                     |                     |                     |   |   | 0.0894493986795812  | 0.0472296612001575 | 0.4468562766843137  |
|                     |                     |                     |   |   | 0.0909997343383888  | 0.0463487826200880 | 0.947365146479027   |
|                     |                     |                     |   |   | 0.5086237454542192  | 0.2680183943390452 | 0.3357114855289661  |
|                     |                     |                     |   |   | 0.5113632201304101  | 0.2655483028453370 | 0.8357666781265649  |
|                     |                     |                     |   |   | 0.0919520005593448  | 0.2667460862694358 | 0.4464562573252573  |
|                     |                     |                     |   |   | 0.0896304936523571  | 0.2662286999321351 | 0.94733575745270544 |
|                     |                     |                     |   |   | 0.5074786487344791  | 0.0469789435507362 | 0.2380412878827274  |
|                     |                     |                     |   |   | 0.5078939197235505  | 0.0460264951987281 | 0.7380788881251394  |

0.510076054941193293 0.8498757606782719 0.3365186356659263 0.7950864574907712 0.5543087213637456 0.3393855483095417

0.5100239734369216 0.849582599594122 0.8361075271910106 0.7972704687277528 0.5549973664542150 0.8402899123947739

0.2866898993465129 0.2670428006626328 0.44628200527168265 0.3324371941111137 0.8692888585547683 0.0031073031203452

0.2861145715760867 0.2701179466082675 0.9469863404501120 0.3314873365759979 0.8684898273413582 0.5029854917335841

0.437530648109756 0.4188484953311667 0.4119602173770675 0.1081680538647757 0.0910456053752399 0.3589244580752834

0.437830040477155 0.4214168668544951 0.910660961295382 0.1092702675045380 0.0907298904504433 0.8593720121008341

0.8574682261187412 0.197407082378862 0.0233903190503922 0.3321907596049668 0.3799310645646889 0.2472299927874131

0.8567744612266063 0.1973891188062360 0.5227239971042232 0.3338140576095669 0.3787930805687287 0.7458480008441813

0.6600991262415883 0.198321577405995 0.1212528432142649 0.6209469147984670 0.0917048338752671 0.3592568139018935

0.6607473396406081 0.1972171567001896 0.6213554252288134 0.6280989917454579 0.0891079417737818 0.8580530140615700

0.4382370867927050 0.6144556046250539 0.4126342977510611 0.6206690796745220 0.0915941658051330 0.24708643302907676

0.4406175252285162 0.6163415182090961 0.9132111844587678 0.6200542762608493 0.0950398023445494 0.7454717592869953

0.4391602310348394 0.4194739426612277 0.1211875845504597 0.3314418055682558 0.8686221831094968 0.3587050173788472

0.43997767489814874 0.4169846192982852 0.6184037859013549 0.3325895642024622 0.8693749301637258 0.8589348829378932

0.6603925034912925 0.1966865716390651 0.4122198141920065 0.3323709493339524 0.380993308770414 0.3589896307292359

0.6614809671313837 0.1972958481927465 0.9119251054958230 0.3219390901007294 0.392096447821828 0.8589594096587102

0.8555967236134310 0.197435288855937 0.412348523736097 0.1079658989651945 0.3806163430135738 0.3586627741510511

0.8565960696800853 0.1984432380265792 0.912776751715945 0.1116980567119355 0.379601868572618 0.8593080252963964

0.439374865573217 0.6153150570191561 0.0229767166519600 0.3318508851808906 0.0909320955454391 0.2467180767399041

0.4381435049005289 0.6167233488287495 0.5207925567229149 0.3319346740279575 0.0899526073831706 0.7467436491021084

0.8563711591951292 0.4206211218690933 0.4115040891320898 0.6211607490571246 0.8681134459438906 0.3583850528305063

0.8537062172975926 0.4190148374172443 0.9131979420356348 0.6218276261667542 0.8687443941392167 0.8590232994006638

0.4393836219235651 0.1973483541962715 0.12110909311630072 0.6142325418623759 0.3734752809500228 0.359915621286032

0.4371097519091064 0.1969487037889447 0.6214133157688252 0.6157467206378121 0.3741168990193044 0.8558859898232018

0.4389614123477506 0.1973600039685205 0.0236041077193256 0.8382083458743054 0.0842947803803614 0.5003879700566500

0.4383381216339498 0.1969494462590252 0.5231823549758281 0.6149198324994982 0.3745445133261880 0.1126286485800115

0.6611685960119528 0.615572869008497 0.4112837626935243 0.6153977358951136 0.3739967165721677 0.6105591911959571

0.6611462206031388 0.6168294791938361 0.9121363477185700 0.3227798859155563 0.5982204100444314 0.5002878460681318

0.4753720549458788 0.0193532762623686 0.0356449802262652 0.3264004841817404 0.3741438903491434 0.11225805880951961

0.4730341555788773 0.0178025564430759 0.5370027236595129 0.3223160679967313 0.3735160750646508 0.61242298089996160

0.2602601383814869 0.2333721592913717 0.1794945506531631 0.6147431823401559 0.083070808666135 0.5002489279993844

0.2590584465032613 0.230347175945507 0.6798429924441298 0.8386949456909043 0.3736371503243032 0.35571260553699992

0.6861946797181313 0.7332378633511904 0.4288443633157413 0.8397061556138899 0.3749336116388324 0.8553684398473838

0.6877083646773408 0.7332297059816207 0.9293787657881227 0.6145307404717101 0.5981153072923788 0.4989275369022456

0.6857719617345622 0.020095939944529 0.1796290550369948 0.6150211819959694 0.5986860742202864 0.0002561381033335

0.6856697051232499 0.0188416253774934 0.6795870676746533 0.8376143885155057 0.3742054753089056 0.49963732498048791

0.2590649567271485 0.4453130852885209 0.4301636764952942 0.3248997695161575 0.5986519363200113 0.0007884005180464

0.2560125392768618 0.4477489811215949 0.93022948959939806 0.6158811319683644 0.0853731982121508 0.00313365556254

0.4726421387522274 0.7325678710127556 0.3237484054805240 0.3285879432419952 0.3744578695217114 0.0001859258269180

0.472574891495366 0.7330171807612916 0.82385879481937467 0.8385897481020618 0.0850733488455757 0.0007539452214454

0.4725179036940328 0.4465951837456239 0.1796705780804274 0.8384400753198190 0.3739921706516020 0.0007436225544274

0.4702895078928450 0.4482186594214606 0.6764194326014009 0.9735149434799890 0.4459650544273507 0.3226653156659101

0.6866726405937140 0.2325583930915834 0.3230698049566582 0.9752171693313969 0.4447649861070720 0.6246604967103243

0.6899193005704873 0.2319503116054186 0.8224227522444657 0.9738455323371430 0.2329449212757678 0.0365058241742890

0.2615679664905028 0.7331921741549504 0.0363105729432062 0.9732316010844631 0.2339848523303672 0.535111516180957

0.2600106277249172 0.7328036332788481 0.5360419421555209 0.9733666771244544 0.0192805850386967 0.4297758543995450

0.4738504667608481 0.4460804473626376 0.3227265947863166 0.9739419253383857 0.0198299863265917 0.930253944907863

0.4765715313815733 0.4575007092723880 0.8190586577379619 0.9733166564334926 0.2319277326217594 0.323315071076553

0.6867641196653199 0.2325128584437655 0.179731853286972 0.9740217277254302 0.2324106277179687 0.8240084998985370

0.6875437814984946 0.23463683037395197 0.6787643143925588 0.9736753833411934 0.0187622537594875 0.0363610234299306

0.2604733224090378 0.732874500360457 0.4289285155166904 0.9731052869597229 0.0188082532550625 0.5360622723142293

0.2625848993962496 0.7330916590934385 0.9289442263280195 0.9734633691799166 0.4448770709825108 0.42954480612152174

0.2610571926943913 0.4455538312102664 0.1797375286926518 0.9727254550059236 0.4452262792237497 0.9287291913031281

0.2614173966956310 0.4453776280488849 0.6789497138362554 0.4362773043779120 0.3811516678212583 0.8199170022989150

0.6878170546293573 0.018175940626163 0.4294940987555376 0.4649417388189201 0.7489376835270194 0.7346981066267572

0.688003855962292 0.0180893307012183 0.9304305153080814 0.50321303994124902 0.62529251584338793 0.7498501363490463

0.4727156099463237 0.7336057075741075 0.0360120285028691 0.43939458281464939 0.58890414648883227 0.7491135528030255

0.4727830904143351 0.7324690313682563 0.5330530699831554 0.5157282803726093 0.6815931600609026 0.695412845437371187

0.474465390148246 0.0190624976278897 0.17954449492438027 0.3529429944727160 0.6240379898056518 0.8203643437371187

0.4464058780704969 0.0179579221146611 0.6796267866489057 0.3070347117692469 0.746832786648527 0.72949010610520829

0.2606067997481368 0.2342443285008259 0.0358551253740701 0.1973033711100206 0.7080933881941719 0.7786842558800765

0.2600358256407000 0.2325827745491128 0.5358200986453282 0.2463391213844006 0.5877173804745408 0.810063723895152

0.6859379157630949 0.7329927982916219 0.3225998855699139 0.1877894748341967 0.6288074722488372 0.8816206202119209

0.6891098388724839 0.7341778046519619 0.8228385064982595 0.1424537347781506 0.7497209849813624 0.850638720575077

0.3336232481499513 0.0930523823923213 0.00314822793762981 0.0300961431965181 0.7152175325307798 0.8401581132133827

0.3325275120668553 0.090778450347262 0.5037147591546303 0.0763032551957264 0.5934792635491807 0.871551704242348

0.1080805445130549 0.0906247146879197 0.0044985504729768 0.0141383527363568 0.6778538829613635 0.9005470935792294

0.1076533187328344 0.0909915792849338 0.5036673584082486 0.4799968862445736 0.6824028337750714 0.7318152555400698

0.1528642392010462 0.1972723850503354 0.0186338022341106 0.4010399953947328 0.6484475739583573 0.756117259194106

0.1520442148663948 0.1964628189759875 0.5186336135460466 0.31794710662799875 0.6790067811368038 0.7925526498938861

0.1522927044442660 0.9108963342640910 0.0189442302688630 0.2280324739743556 0.6606572584607910 0.807077095347181

0.1516619791191784 0.911210139619218 0.518324264387389 0.1564828472162098 0.6779226087480669 0.853524256804519

0.4388126932148882 0.9125230270103611 0.0181187517500928 0.0641416327708839 0.6655044762341860 0.8671066286075807

0.4377937765991728 0.9102937876293452 0.5189511270482516 0.43939458281464939 0.58890414648883227 0.7491135528030255

0.1519030800976406 0.1972446778747869 0.2688178350192566 0.15173923057801 0.15162842993351386 0.0000000000000000

0.1521173923057801 0.11066040567756 0.2687698458849934 0.1532641189971169 0.410430804116874 0.7688330299959149

0.6521258657338644 0.911280997582414 0.4113535461155482 0.6521258657338644 0.910729900230578 0.1912472182694613

0.6531068188267642 0.910729900230578 0.2689331307906633 0.6526891771293031 0.1962477695602200 0.6782967806301977

0.65625979201094382 0.194971645084570 0.7682967806301977 0.651282995309555 0.9134361294868601 0.7689471255646992

0.5085562055326049 0.5540020114312463 0.3405830993706769 0.65185311968314018 0.1958595251192008 0.76949475882919495

0.7950791073717962 0.0540703435860125 0.0906984899491264 0.7944470585148552 0.0534232004812731 0.5902818236213908

0.7952374506459183 0.268247723824572 0.0906599048723890 0.795471329673571 0.268287862809159 0.5897154434243937

0.2940009826173822 0.5540237350149381 0.4472152292155374 0.2970691338147450 0.5552126849442560 0.9466386125314623

0.2952731037842194 0.5544678700762457 0.0906551635548189 0.2951495222199363 0.5536974424894948 0.5897342891297386

0.7950174776290740 0.0529907815003784 0.4477540641720837 0.795885392366796 0.0540936201307822 0.3405277608657805

0.7947836983457992 0.2678935018261197 0.8407755671824891 0.5088680005180789 0.5549593748313950 0.0902971491463736

0.5078759467392823 0.553708169668072 0.5882861886489242 0.7952997264713147 0.5548078887419211 0.4466742727027921

0.7953023359475300 0.554078749898766 0.9476072220840732 0.510479281534427 0.053092832734086 0.090336029543427

0.5096510537130451 0.0529598598566510 0.590456740249199 0.2947932066491056 0.2696888712513110 0.0900814319689464

0.2942100377983453 0.2665725278259837 0.5904472010615883 0.7950864574907712 0.5543087213637456 0.3393855483095417

Hex-2-ylium ST (FAU)

| Si                  | O                   | Al                  | H                 | C                 |
|---------------------|---------------------|---------------------|-------------------|-------------------|
| 1.000000000000000   | 0.000000000000000   | 0.000000000000000   | 0.000000000000000 | 0.000000000000000 |
| 17.400500000000000  | 0.000000000000000   | 0.000000000000000   | 0.000000000000000 | 0.000000000000000 |
| 8.7151432720031057  | 15.0162842993351386 | 0.000000000000000   | 0.000000000000000 | 0.000000000000000 |
| 17.5186242368413545 | 10.0514156204086493 | 28.3978170589599976 |                   |                   |

Selective dynamics Direct

| Si                 | O                  | Al                  | H  | C |
|--------------------|--------------------|---------------------|----|---|
| 95                 | 192                | 1                   | 13 | 6 |
| 0.3303506097197888 | 0.6218314733959325 | 0.4473501417651115  |    |   |
| 0.3345820279490384 | 0.6222886143770723 | 0.9483138119969390  |    |   |
| 0.3323310827017395 | 0.4451623126205536 | 0.1263744602686010  |    |   |
| 0.3315327621348078 | 0.4434649730014203 | 0.6254566083933424  |    |   |
| 0.6897203358828121 | 0.0856253517784332 | 0.4474623948177982  |    |   |
| 0.6919420614485444 | 0.0862470778422117 | 0.947355382586027   |    |   |
| 0.866969680534973  | 0.2650765042185791 | 0.3578979511757951  |    |   |
| 0.8683427094216914 | 0.2662929532920890 | 0.8582885131557739  |    |   |
| 0.5101845365335124 | 0.6236967441884135 | 0.0378383903017705  |    |   |
| 0.5098515374889905 | 0.6219055408308416 | 0.53572456048000416 |    |   |
| 0.5094620737007474 | 0.6220290821026004 | 0.3582584211204784  |    |   |

|                    |                     |                    |                     |                     |                     |
|--------------------|---------------------|--------------------|---------------------|---------------------|---------------------|
| 0.5105707878593659 | 0.4438787599428402  | 0.6238021849448103 | 0.43845164888254466 | 0.1923154293585900  | 0.5241238444812131  |
| 0.3319475768222748 | 0.6226604091321886  | 0.0383588422482911 | 0.6621605682641724  | 0.6129819253488429  | 0.4111471833767074  |
| 0.3301695071898412 | 0.6217678770306002  | 0.5371305491705340 | 0.6646687209965562  | 0.6135991415765928  | 0.9126941058514109  |
| 0.6901369925125079 | 0.26493238440452077 | 0.3578261967918369 | 0.4767687068841471  | 0.0178520510710186  | 0.0353783510890356  |
| 0.6944176950861336 | 0.26352408103100282 | 0.856490477889248  | 0.4745044211763728  | 0.0136973404826028  | 0.5371597053321242  |
| 0.4405825996177477 | 0.01681075946299627 | 0.000554288795627  | 0.2613707211407558  | 0.2313707211407558  | 0.1798755665768383  |
| 0.4391458326436620 | 0.0129372620423222  | 0.5018866434372292 | 0.2611630507593485  | 0.22736600513134301 | 0.6803053621328952  |
| 0.0821981111872521 | 0.373380192195307   | 0.3218873012684457 | 0.6874988249676383  | 0.7302427552335041  | 0.4288950000537978  |
| 0.0861553092644957 | 0.3720953092644957  | 0.8227818796383808 | 0.6893087967967335  | 0.7311256875573217  | 0.9298684610614283  |
| 0.2594530187556056 | 0.1944204055092188  | 0.2334948084758660 | 0.6878924699403872  | 0.01716353789383656 | 0.1796262141162801  |
| 0.2599960053116099 | 0.1931471868481876  | 0.7336317369335397 | 0.6876504678561461  | 0.0151728487921957  | 0.6796733059891920  |
| 0.6179769986177243 | 0.8378583024058057  | 0.4111554363950107 | 0.2609186630822054  | 0.4412229451370350  | 0.4305917322865676  |
| 0.6189926025897426 | 0.8385257944599258  | 0.9122950912655295 | 0.2589021745366650  | 0.4460541693237682  | 0.9316989721880791  |
| 0.6178132064044534 | 0.0150517640110711  | 0.2331481006988252 | 0.4734488995030702  | 0.7297117807102441  | 0.3237483851289041  |
| 0.6183508743577830 | 0.0153143911897310  | 0.7331983717055995 | 0.4765031974476057  | 0.7277930840950817  | 0.8245910870061088  |
| 0.2588659915057056 | 0.3725588704637950  | 0.4122249474217673 | 0.4744768444574711  | 0.4438076114787828  | 0.1799713232495059  |
| 0.2571851069229248 | 0.377966697411044   | 0.9122092808538861 | 0.4731154973771432  | 0.4456056688192794  | 0.767374230223980   |
| 0.0831904976842759 | 0.19464449020877318 | 0.0017076486819972 | 0.6880795635318260  | 0.2295373224731657  | 0.3230398644751149  |
| 0.0822927645002227 | 0.193815977088031   | 0.500981242906909  | 0.6981597925549897  | 0.2251696512261928  | 0.8213111815814817  |
| 0.5109267164548736 | 0.0861625372869309  | 0.1257840968818306 | 0.2630717842301180  | 0.7306061982993300  | 0.0367667900363380  |
| 0.5102458742219775 | 0.0840317793150668  | 0.6263529104559391 | 0.2608699928713158  | 0.7292796594558473  | 0.5365255559989183  |
| 0.4305845472067869 | 0.8376067874664519  | 0.3219897844459931 | 0.4740432539619233  | 0.4432462390374059  | 0.3233750788707697  |
| 0.4413814451513047 | 0.8362489862956117  | 0.8226866238669835 | 0.4740244401375728  | 0.4618997749192778  | 0.82004366503205081 |
| 0.0814813292717159 | 0.0143350248468438  | 0.4119519811799260 | 0.6880740674942978  | 0.2297618870136577  | 0.1799057843863227  |
| 0.0833169345450860 | 0.0141878430909047  | 0.9125113146175264 | 0.6895227313033372  | 0.2305671873310181  | 0.6788853795025518  |
| 0.4390809383939221 | 0.374100206049499   | 0.2336164473622196 | 0.2614313735745222  | 0.7295051783122206  | 0.4290032796442083  |
| 0.4407632258645807 | 0.3779719122267134  | 0.7315385115774805 | 0.2644106922879077  | 0.7293396038775728  | 0.9300871549597073  |
| 0.6184192553569885 | 0.1943924611692310  | 0.3218084934989549 | 0.2625582383306333  | 0.4419665582532661  | 0.1801215980104345  |
| 0.6218046102508941 | 0.1953213752980364  | 0.8213268078243674 | 0.2634986538684459  | 0.4415386880311669  | 0.6792007320884149  |
| 0.2601246327224092 | 0.8382752456034611  | 0.0018171947484271 | 0.6880406448088712  | 0.0156345940698954  | 0.42973427091161339 |
| 0.2585988826864972 | 0.8366479127699801  | 0.5012753050717320 | 0.6889719296127970  | 0.0155312486747788  | 0.9306994222463920  |
| 0.4393665608791303 | 0.8391606215069043  | 0.0014052715561907 | 0.4737354901473132  | 0.7314685248256891  | 0.03668938833919    |
| 0.4386868601079866 | 0.8371829918731044  | 0.5007070052545456 | 0.4745154457074306  | 0.7291614807028992  | 0.5352773926784052  |
| 0.0821181610682590 | 0.1942364473902360  | 0.3220066769361934 | 0.4757741682639453  | 0.016098490987878   | 0.179541217618023   |
| 0.0841078098133000 | 0.1941821081744403  | 0.8227429159720459 | 0.4756731243575313  | 0.0134114665228324  | 0.680123711848837   |
| 0.2599560237377745 | 0.3726929144387238  | 0.2337544234079105 | 0.2613180088341862  | 0.2308302692658970  | 0.0368679229895060  |
| 0.2618789842147247 | 0.3721767472512912  | 0.7330388124348636 | 0.2603923000953305  | 0.2294928861135889  | 0.536243589426478   |
| 0.6182047428492687 | 0.0140766395456336  | 0.411989961372800  | 0.6872923849748390  | 0.7302435484368306  | 0.3224138958994223  |
| 0.6202413331471964 | 0.0158237190213507  | 0.9114901103412645 | 0.6926873656197691  | 0.7315919179424242  | 0.8233830729786273  |
| 0.618505159897748  | 0.194363060719073   | 0.23549404648486   | 0.334637050880900   | 0.09054440221012    | 0.0022282216385292  |
| 0.619360794672587  | 0.1963381711396610  | 0.7330829700958414 | 0.328297400957121   | 0.087282114240868   | 0.5042590531215689  |
| 0.3308398920295241 | 0.2662713868757737  | 0.0379233638019992 | 0.1102360422346594  | 0.0885990702773717  | 0.003915176491311   |
| 0.3299746339206395 | 0.2639058172094926  | 0.5380290926767947 | 0.1089939962826406  | 0.0877108861445421  | 0.5035494845697975  |
| 0.2586452942543447 | 0.8370595769100221  | 0.4117958742226767 | 0.1539852321502359  | 0.1943561083035404  | 0.019220953513817   |
| 0.2609773664416482 | 0.8372456268231054  | 0.9126280997301470 | 0.1529511631253332  | 0.1929844801132299  | 0.5188887378746861  |
| 0.0826916497347171 | 0.0148459185093428  | 0.0017017197158476 | 0.1535497125084994  | 0.9085097140547378  | 0.0191773686000172  |
| 0.0813245077650994 | 0.0139773926814290  | 0.5012893771758955 | 0.1525777793220483  | 0.9078405887187683  | 0.518652023000015   |
| 0.0824855521693948 | 0.3728935473518336  | 0.4117024110098870 | 0.4402232165806880  | 0.9105516477464388  | 0.08116967811634896 |
| 0.0831640962442514 | 0.3741237546473447  | 0.9125910108581229 | 0.4388195252388888  | 0.9068929058362645  | 0.51901221713753965 |
| 0.4396533414431387 | 0.0142733102591767  | 0.2330915422433420 | 0.1533383313898536  | 0.1945086370039845  | 0.2690987522599655  |
| 0.4400901297310165 | 0.0124079148836406  | 0.7336705120886403 | 0.1542978840150804  | 0.1936525931950435  | 0.7696704371978374  |
| 0.6175831896250112 | 0.8377141865227749  | 0.3215303207861524 | 0.1536788839724244  | 0.4079697777601715  | 0.2690790385905468  |
| 0.6204901516349743 | 0.8386108202311015  | 0.8221960474590813 | 0.1560469098464474  | 0.4065956461501227  | 0.7691850478499607  |
| 0.2593381657056704 | 0.1967655169884223  | 0.0013652410804768 | 0.6528947191485581  | 0.9083867488753208  | 0.41152282851535739 |
| 0.258641004520648  | 0.1934684427127259  | 0.5015729778011953 | 0.6537615469385579  | 0.9089435048897765  | 0.9125587300928127  |
| 0.5095367499092931 | 0.4448108404982019  | 0.358228955545129  | 0.6538066753337426  | 0.1933251147502960  | 0.2691211150923650  |
| 0.5122798042116286 | 0.4448625252699566  | 0.8587089244916866 | 0.6564527199717585  | 0.1935228315101036  | 0.7685180758247198  |
| 0.8678294875056573 | 0.086337729061829   | 0.0375431988343133 | 0.1523666286792172  | 0.907883614200379   | 0.4123303438221205  |
| 0.8665209747955973 | 0.0858202405050367  | 0.5372595653939670 | 0.154929135101350   | 0.907803762464686   | 0.912551161294444   |
| 0.690696927920235  | 0.265577545510207   | 0.1261924387610188 | 0.4381914738123087  | 0.4094292628134889  | 0.2691826767404178  |
| 0.6909158931604240 | 0.2645270842721579  | 0.6257709114664516 | 0.4414379249904905  | 0.4206083195983593  | 0.7625383519429872  |
| 0.6901848721273796 | 0.6225308020151510  | 0.3570030032096143 | 0.1530737317518719  | 0.4079189313529152  | 0.4119478813688414  |
| 0.6955276663600293 | 0.623918938674005   | 0.8582326881483785 | 0.1482983412554534  | 0.4109033787698018  | 0.9159607512570105  |
| 0.4388435999704495 | 0.3738162118316815  | 0.3219588093824678 | 0.4397669911927953  | 0.908106469105173   | 0.2689001041537198  |
| 0.6162759986830607 | 0.0826458819209001  | 0.1124059198492609 | 0.4410190389256524  | 0.9054306403151872  | 0.7693028609919711  |
| 0.6154551628086149 | 0.0811331434197927  | 0.6126072757987795 | 0.6524293187781435  | 0.9087591381431979  | 0.2686527133574945  |
| 0.3268746237954485 | 0.36964920704937996 | 0.5008056319662916 | 0.650446929999325   | 0.9099073017828906  | 0.7691140148427564  |
| 0.6155828269006955 | 0.5948350700895646  | 0.3555728445862954 | 0.5091773105641156  | 0.5509484902465236  | 0.3410115253741238  |
| 0.6208223519727046 | 0.5978471349888420  | 0.8559957212700730 | 0.5154414993676416  | 0.5475980603186090  | 0.846128989863621   |
| 0.5091114413057646 | 0.8475362002719271  | 0.4464234089337105 | 0.7965388744502446  | 0.0516443957937956  | 0.09051158063050414 |
| 0.5103602571618351 | 0.8464887252802404  | 0.9473441901637704 | 0.7956202823610455  | 0.0503582654529467  | 0.5902041722271332  |
| 0.0908757204814706 | 0.2646416362024988  | 0.3366517311686053 | 0.7968514578362310  | 0.2649445809138610  | 0.0908646184966309  |
| 0.0955753960457107 | 0.2631474533570041  | 0.8370993600202089 | 0.7967913503640092  | 0.2647726417196400  | 0.5897855641907296  |
| 0.288752756213008  | 0.2636227470262734  | 0.2388210224363083 | 0.2958136223357054  | 0.5502576882403996  | 0.44757163529208755 |
| 0.2903707420958758 | 0.2635073887707972  | 0.7374241175945663 | 0.3059965722402724  | 0.5508452618894359  | 0.9457173277269775  |
| 0.5097689517162017 | 0.01236508022882    | 0.4477391150024506 | 0.2974302264921458  | 0.088128985086736   | 0.3390505800541008  |
| 0.5109577447693936 | 0.0453768344574794  | 0.9462816067359122 | 0.2964320655918443  | 0.549649349451430   | 0.5900124128157700  |
| 0.5099082036518978 | 0.2633184413974333  | 0.2385630834537206 | 0.7953717980642849  | 0.0508682364158027  | 0.447726787214917   |
| 0.5120795807677607 | 0.2686472264731966  | 0.7364576285814119 | 0.7976548617449614  | 0.0504681135726095  | 0.948035302428473   |
| 0.2877382592158567 | 0.8452186225001636  | 0.4471863983852129 | 0.7959488594394379  | 0.2650654663154177  | 0.3405657071924067  |
| 0.2897157034884260 | 0.846917511328183   | 0.9475535050725955 | 0.7986644291832135  | 0.2673459239892712  | 0.8399056309181738  |
| 0.0905328383149617 | 0.0433713426174500  | 0.4470665915877726 | 0.5100292175157766  | 0.5523022802252526  | 0.09079949704704369 |
| 0.0925231899285063 | 0.04352726668712001 | 0.9474101678017766 | 0.5104471805409766  | 0.5504157402441801  | 0.5883156021122815  |
| 0.5097766596333333 | 0.2651126225607972  | 0.3360746677032505 | 0.7965140292493549  | 0.5519152922306350  | 0.4465441447669781  |
| 0.5176550170149328 | 0.2676538887535242  | 0.8359546386918496 | 0.7970509106136383  | 0.5515363832151589  | 0.94875959513808776 |
| 0.0931858854766813 | 0.263250359892501   | 0.4465306111113639 | 0.5119660031934926  | 0.0512150078635060  | 0.0901063652378553  |
| 0.0916997178549526 | 0.265027978086441   | 0.9475458037952980 | 0.5111644308866441  | 0.0481771825414474  | 0.59088040323919733 |
| 0.509254527985014  | 0.                  |                    |                     |                     |                     |



0.6167045050051239 0.3718966679545933 0.112762431920333 0.4361026601648446 0.3797523892108657 0.2322070886710144  
0.6171041456203934 0.3703309132375782 0.6107685413863179 0.436199747802318 0.3859153342897855 0.73015366765990883  
0.3242314684126310 0.5953226799506501 0.5003772174138781 0.6158260774936992 0.1994570794236989 0.3205805790804288  
0.328249125339798 0.3716557085935460 0.1122458847806404 0.615845605193661 0.2022536755906388 0.6199088130739208  
0.3252037626142870 0.3694804861277102 0.6124831032962309 0.2564290391791363 0.845249384466335 0.000717915044372  
0.6150859504340076 0.0803683808214559 0.5004117992179143 0.4367434610711482 0.8494809537183809 0.4994809537183809  
0.8401184926357850 0.3711209883709737 0.3554463934053955 0.4367758726808477 0.845916392099170 0.0001350315197547  
0.8413150261840557 0.3723957550469193 0.8560444578703675 0.4358143126913698 0.8433237522363513 0.4992528210324214  
0.6158705554781274 0.5950282494306178 0.4988414887795479 0.0801281501716555 0.1990850263908900 0.3204381373452219  
0.6163213287107322 0.59685344604991780 0.0008649949548447 0.0796387235837710 0.2015201262384904 0.8212581095135340  
0.8388693480626271 0.3713448004241718 0.4996515172405792 0.2570777356830000 0.3788527552245081 0.23202751542844371  
0.3258959847004627 0.5947548191873904 0.0021078772099546 0.2572141682885747 0.3796894760666180 0.7316822912328228  
0.6168208245823334 0.0847009122770364 0.9998978646078325 0.6159880062704750 0.0189387711730708 0.4107851312715513  
0.3276643401035093 0.3722888810298224 0.0009860491384316 0.6185853748219746 0.0221086226831699 0.9098232559673954  
0.8406709690472781 0.0823705887670229 0.0005462918528850 0.6153997183259848 0.1999905843727755 0.2322459771080503  
0.8405725029371370 0.371269582724359 0.0010843534243560 0.6162458666265039 0.2038213133179522 0.7317596162630542  
0.9749760153403532 0.4433599109440552 0.3226811553227776 0.3289585671629114 0.2740086273871254 0.0355345954817240  
0.9779375967893242 0.4408852521555572 0.8249021752019531 0.3271525747303580 0.2701258388416013 0.5365106095949391  
0.9754459446426398 0.2293442788108408 0.0367407742497857 0.2570609216181919 0.8424678317121012 0.410232105096828  
0.9744572541200939 0.2306382601041026 0.5350846635935840 0.2569518853652015 0.8455122192772087 0.01912600103296916  
0.974693997933298 0.016811686712324242 0.4295623008646552 0.0792151681587848 0.0221508756134862 0.0005802171477041  
0.97590518719192095 0.01686686298149 0.930113262498517 0.0785309225954622 0.019662515286507 0.4998089529057195  
0.9746923278016226 0.2290140165279379 0.3234314609079278 0.0799652436272469 0.3781137137517157 0.410285252684657  
0.9766101844180103 0.2307651560807022 0.8240424579321465 0.0789238956366762 0.3813230091911747 0.911287092264697  
0.9752311821748149 0.0168615250494277 0.0363807206117339 0.4370096474529034 0.0199015606404598 0.2315499250714535  
0.9739810205497950 0.016022019064514 0.536102965931048 0.4363071492276407 0.0202933269213428 0.7320509315530381  
0.9747192255282121 0.4419838992507300 0.4296974607990134 0.615374620225272 0.8429346197399378 0.3201811291530865  
0.9746573685104246 0.4433886532839626 0.9290067535121214 0.6165511840819577 0.8460426892709978 0.8207878320021009  
0.43874864941228473 0.3807346455795960 0.8199018468889423 0.2565433153660844 0.2044590441401258 0.000732524670583  
0.5223805388388068 0.598113271783504 0.7690646253439527 0.2556617421532279 0.1992628782310173 0.50042384604004899  
0.4739642416696265 0.567609597921131 0.743578422568377 0.5071836376507383 0.4501004928252458 0.356702759622239  
0.493324628168916 0.7769201583095229 0.7157714718601353 0.5086781838441153 0.4538851018913888 0.8556728199774991  
0.6045453882733538 0.6875573736609591 0.6932195208404112 0.8645850370481839 0.0933255439915979 0.036236363719989  
0.4134868775179442 0.757638846378283 0.6811623712008540 0.8637084094405454 0.0912856934550147 0.536022209452228  
0.530407775875720 0.6964335589929607 0.6128823847369637 0.6873301078478407 0.2716039590225488 0.1249050158255845  
0.5003118238861973 0.6019360411029994 0.6627685405485968 0.6873247075433428 0.2714897746110143 0.6242996780132056  
0.6101760857258355 0.615385239331337 0.6452330640750570 0.6877804243374037 0.6274462678616205 0.3559061005377433  
0.3560923402433862 0.7356311644642080 0.7707093472822167 0.6893140686336903 0.6309406546369392 0.8566372983373343  
0.2904605330102206 0.6460967620585137 0.758936991247889 0.4363267928823245 0.3788916890355749 0.3206296481785858  
0.214917219000327 0.689193584226894 0.8072589234743105 0.61335649035264856 0.088733319197329 0.110282973899589  
0.28633766997398061 0.5670697037150351 0.8166102767035127 0.611934903836318 0.887625489993441 0.61151578536980  
0.363670611307269 0.6465714698549635 0.8234078075490832 0.3237969302462496 0.375798250909016 0.4991853017669667  
0.4617245376774737 0.6058207291694260 0.7641726195960379 0.6135243841669317 0.5999210852812441 0.350658345486178  
0.5295579821732388 0.752537715802332 0.6978240670130971 0.6150798626873503 0.6050248628201569 0.853879535956316  
0.4877349961557021 0.715253736347029 0.6774004157162765 0.5064861410791637 0.8533724289485294 0.4450236244102500  
0.5354881755859284 0.6533474780861862 0.6484113388147027 0.5071737176939035 0.8536631394911658 0.9460259164289421  
0.3653474736529212 0.659958520301754 0.7886768649110806 0.0889930382782495 0.2694007939083580 0.3351325393545150  
0.2852661608719429 0.6391218363222388 0.7928765005266258 0.0901716211720043 0.2717073086343693 0.8352336631148605  
0.2860507138092326 0.2700603560479333 0.2366176657387425 0.2852046437305177 0.271964715295657 0.735975419191317  
0.5074403266115741 0.0475942552850193 0.4463959695983461 0.509672174299531 0.0519505641875380 0.9444169801792219  
0.5068455804868211 0.2709399009579563 0.2371305329729201 0.509681811154326 0.2773585382122292 0.7356615988158969  
0.2863722763050752 0.8513437610432707 0.4452915602125592 0.2857608009732275 0.8541122830198675 0.9464756912006076  
0.0877058107653162 0.04930690267979794 0.4455692391775810 0.0894030925807628 0.050968786090157 0.9461799348148217  
0.5070741642418577 0.2700876214942259 0.3348726862902234 0.5080817899851433 0.2681389752577656 0.8333544021191852  
0.0897440831085254 0.2692687103545767 0.4456365941139767 0.0883543654195793 0.2720797213056015 0.946146892635752  
0.5063743369955328 0.0491859601857349 0.2366702528652489 0.5065308853695083 0.0493528126012982 0.736356949728111  
0.5067035310584150 0.8520020601660924 0.334919332777132 0.5081073190313137 0.8549478316750944 0.8347380322372406  
0.284666635008063 0.2693451836748191 0.4460891001423390 0.2825050234700373 0.2770229785561802 0.945794159482738  
0.4366157228012661 0.4205451640979801 0.4109877303705143 0.4366329521558972 0.4258432642929896 0.9101388311638218  
0.8559954946987699 0.2017042745229750 0.0219462432724763 0.8548673385316096 0.1999729135432164 0.5214739018393647  
0.6578628554336976 0.2017884921475271 0.1201862741950190 0.6584874161582205 0.20069672051666212 0.6198517889434028  
0.4374902446615994 0.6170264584715247 0.4111719043844416 0.4392474639212101 0.621159453996488 0.912569634584862  
0.4374595134340526 0.4237123269062860 0.120643220987427 0.4379627340309065 0.4203275080567839 0.6177333842782181  
0.6589427806248468 0.1993161614717084 0.410833771158481 0.600304309924230 0.2014795211987704 0.9102706210158021  
0.8547609803001882 0.1996818451915467 0.4108752329624990 0.8545812406749657 0.2036587421990136 0.9111317493935059  
0.4369594139144780 0.6205938048822944 0.022347539105364 0.4369433936875919 0.6188403460208768 0.519604960760285  
0.8548652625752146 0.4217639538230408 0.4104789427992535 0.8522064257462815 0.4225642610558248 0.9119865441565851  
0.4367703587215266 0.2008477321369115 0.120318071906355 0.4351493102188304 0.1996229634175486 0.6201313194277502  
0.4379866805077862 0.2037124576676735 0.021560597359225 0.4356816974258925 0.1987495173685281 0.5225005206998449  
0.6591814038387891 0.6177069791963667 0.410151484154265 0.6583663992232355 0.6214480594875901 0.9110575949221608  
0.4726492570228378 0.0262544346032646 0.0335543225918477 0.4716970909170321 0.019989577807217 0.535732252071056  
0.2583820312662319 0.237014543761742 0.178047912519687 0.4374595134340526 0.4237123269062860 0.120643220987427  
0.2572770333961484 0.2345078833673978 0.6787666260292534 0.6848291226914431 0.7353307597566222 0.427463180108992  
0.3861758393590567 0.7374436205048358 0.9280465560050093 0.684621226914431 0.7353307597566222 0.427463180108992  
0.684900573312589 0.0226608898178771 0.6783880568104089 0.2579308851422297 0.4474315004526818 0.4286960985272132  
0.2548618970378606 0.4545243838982540 0.929610482992690 0.4715252723998796 0.7348867257335046 0.3221592112262667  
0.4707070410631954 0.7376609884926394 0.82302177718047 0.4715501170222633 0.4496983157233140 0.17863106424252963  
0.4686810810199863 0.4533670090947818 0.6750496895988143 0.6854188746856856 0.2347187747297000 0.3218171501509699  
0.6851845171775274 0.2394640925898266 0.8209054160828401 0.6851845171775274 0.2394640925898266 0.8209054160828401  
0.2590580544624871 0.7377398186270103 0.035683353303123 0.2589302847854400 0.7352178432186984 0.5345063184520973  
0.471910760420143 0.4482667771276902 0.3218581785375397 0.476571530168158 0.45750708822850 0.819058660441918  
0.6849729281718531 0.2345476382954318 0.1786054942645173 0.6858049083137731 0.2376239813097750 0.6773884950677741

2,4-Dimethylpent-2-ylum (FAU)

Si O Al H C  
1.000000000000000  
17.4005000000000010 0.000000000000000 0.0000000000000000  
8.7151432699999988 15.01622842999999544 0.0000000000000000  
17.5186242368413545 10.0514156217992259 28.3978170584678011

Selective dynamics

Direct

0.32835121080804951 0.6270866785103330 0.4458472264995745  
0.3298514779381916 0.63011244776017437 0.9465224137643790  
0.3289826775905473 0.4521010401032360 0.1247462577667689  
0.3280070819429281 0.4502037995166924 0.6241985694264605  
0.687533678358731 0.0906871181019919 0.4461907948406836  
0.6887017684196191 0.0934859673141877 0.9458857643233013  
0.8650058219026521 0.2698612910706212 0.2698612910706212  
0.8640878135520644 0.2731682342989051 0.8566431572537222  
0.5070330215067754 0.6306416517953650 0.0365553988760545  
0.506986900558854 0.6279943718826231 0.5342178157059285  
0.5074296879055835 0.6271890542713681 0.3566899159545223  
0.508860741752474 0.6298163709288734 0.8578669332660096  
0.8646873755060750 0.2722356598425392 0.0364973090090581  
0.8640675412541750 0.200062192160266 0.5356129135742160  
0.6871229672082025 0.0930402631265077 0.1245690528721702  
0.686690200668107 0.0920774926780940 0.6247747466633776  
0.3279650053385259 0.4498372903029396 0.4462292359358740  
0.32847180054348521 0.4540581042674390 0.9455810984741962  
0.3286051057915574 0.2723707539879715 0.1243204540511223  
0.3263184736602341 0.2703354577210075 0.6249703267933059  
0.6879857119703227 0.6275713623718432 0.4450011245252862  
0.6871012878414343 0.6303007254005708 0.9463419840778079  
0.8649700727255910 0.4503678289249176 0.3561629079968114  
0.8650947115028677 0.4522863410731769 0.8571179463714461  
0.5082858371855881 0.0947314648978007 0.0353938121142761  
0.5070500699100793 0.0903505019035529 0.5365488287776370  
0.8642962418246108 0.0909158938710355 0.4461695179213789  
0.8643657821842267 0.0946931211586611 0.9462425150302219  
0.8647225765456102 0.4505004259372014 0.4453956448471741  
0.8623849410622883 0.4517662228497370 0.94651303781234084  
0.5076317541812253 0.4525778555210151 0.1247923529221911  
0.5068730622729825 0.4507916676343354 0.6225608491207109  
0.3283992508172098 0.6301157973284165 0.0366856989103977  
0.3278759473089225 0.6274232385224255 0.5354535197402458  
0.6878269738234377 0.2700709958419522 0.3565243728592552  
0.6873502562409839 0.2735076720825666 0.8560806750514740  
0.4376616904313712 0.0244284828168101 -0.0014740060931168  
0.4364773251847631 0.0188304432436781 0.50049962920480123  
0.0800488891058760 0.3780937316944221 0.3205709411088279  
0.081304403176317 0.3802025071691086 0.8213297842258510  
0.2569091561673108 0.2003605066724779 0.2315475936817250  
0.256329654030186 0.2004975239944846 0.7321582466029876  
0.6155016224730492 0.

|                     |                     |                     |                     |                    |                    |
|---------------------|---------------------|---------------------|---------------------|--------------------|--------------------|
| 0.259628479787556   | 0.7349459342174603  | 0.4277141039156643  | 0.9712359560476879  | 0.0214091715513465 | 0.537777798389836  |
| 0.260951059822466   | 0.7378808034042000  | 0.9278189247335510  | 0.9722264203555385  | 0.4476991588007301 | 0.4277631874561871 |
| 0.259346462704751   | 0.4491474685775942  | 0.1785289596078714  | 0.9700982844234390  | 0.4501045795711626 | 0.927641363512844  |
| 0.2591334836744647  | 0.4490477017217218  | 0.67780221684704113 | 0.4341615816718907  | 0.3850637398785862 | 0.6196348450253520 |
| 0.68653232610796    | 0.0205830905665453  | 0.4286180708675791  | 0.4439907253556564  | 0.783181338154180  | 0.738248885293578  |
| 0.6868594036381788  | 0.0219803288956653  | 0.9294282269827943  | 0.5123681851935438  | 0.6655292383247726 | 0.7364585972290277 |
| 0.4712296727245526  | 0.7382889073344953  | 0.0353909571168866  | 0.4925065359646171  | 0.7567497696741688 | 0.6844712750299240 |
| 0.4709151341627273  | 0.7352715016756277  | 0.5337669789507167  | 0.3330517152843064  | 0.6738011317845127 | 0.807009350490342  |
| 0.4733735449588905  | 0.021758167340645   | 0.1779917468119325  | 0.2833750556125730  | 0.7922678676773873 | 0.7793953364145028 |
| 0.471488465218993   | 0.02082474454540797 | 0.6786414529952235  | 0.2282434627102262  | 0.6347642502687909 | 0.7922123950389660 |
| 0.2598842994768151  | 0.2376748268844766  | 0.0346563439376699  | 0.1892265763048850  | 0.6418370847731732 | 0.8696792198525108 |
| 0.2574638619466460  | 0.2352119748498194  | 0.5351040056599062  | 0.1303427797823259  | 0.7660919710512886 | 0.8501775205142390 |
| 0.6850143054873250  | 0.7352393162029449  | 0.3213813847177345  | 0.4425692567016768  | 0.6536589166330915 | 0.6798295173243070 |
| 0.6871653184206328  | 0.7386717258068053  | 0.8218156866607369  | 0.4064535769436202  | 0.5733805043867438 | 0.7374535110916958 |
| 0.3320363283888116  | 0.0989318450562324  | 0.0004250768717057  | 0.3191991131014396  | 0.6624086311551534 | 0.7134702701774380 |
| 0.3306499687213997  | 0.0932674040848453  | 0.5028573290156158  | 0.1901496454960725  | 0.7876461852829423 | 0.7244571016163587 |
| 0.1056653394122105  | 0.0962023838813478  | 0.0031707260176346  | 0.08729780708459    | 0.7662132676821404 | 0.771654780714192  |
| 0.1058740203123505  | 0.0932771354881103  | 0.5023704961829697  | 0.1264641828435855  | 0.8504956748347061 | 0.7647513595519375 |
| 0.1509134656913735  | 0.2019081223990652  | 0.0176959686714980  | 0.0848659181175829  | 0.6869178624810032 | 0.8569339812280818 |
| 0.1501445683686856  | 0.198262765962992   | 0.5177971235007044  | 0.4589115700972655  | 0.7329532787299554 | 0.722929833317889  |
| 0.1505642092961740  | 0.9161229083544439  | 0.0179887579062321  | 0.3785515624399380  | 0.7052992789303261 | 0.7337717778017744 |
| 0.1500540369580081  | 0.91345649059742    | 0.5168909499230268  | 0.2983224125317567  | 0.7222713655755787 | 0.7794545618873209 |
| 0.4365897323938707  | 0.9180506509831358  | 0.0167102274731353  | 0.20811405994103393 | 0.7041223716511794 | 0.7942900764671406 |
| 0.4359209625422376  | 0.9128734666823929  | 0.5176715511237942  | 0.1501927442622089  | 0.6993031987910114 | 0.8457159249075854 |
| 0.15111319868513551 | 0.1996923620860575  | 0.2674919333224954  | 0.3867205516397119  | 0.6504741501208464 | 0.7141966390161156 |
| 0.1500957614252539  | 0.2004681805080869  | 0.7682359174632902  | 0.1503167190907262  | 0.7811757098273228 | 0.7617865792805056 |
| 0.1509074529657203  | 0.4133612487071119  | 0.2676646413636503  |                     |                    |                    |
| 0.1515921874826190  | 0.414857162263233   | 0.767864069326700   |                     |                    |                    |
| 0.6507077344813479  | 0.9132186884605454  | 0.4103601117657996  |                     |                    |                    |
| 0.6520912794684722  | 0.9149935744888470  | 0.9110048940465834  |                     |                    |                    |
| 0.6508096819604952  | 0.198779853355929   | 0.2678458933176965  |                     |                    |                    |
| 0.6557998432229379  | 0.1982797996766518  | 0.7666832294378743  |                     |                    |                    |
| 0.1505548846857696  | 0.9130441515913200  | 0.4110242552808668  |                     |                    |                    |
| 0.1507289627528185  | 0.915693150270767   | 0.9113205686773339  |                     |                    |                    |
| 0.4353674517841268  | 0.4145740219299605  | 0.2679184332834783  |                     |                    |                    |
| 0.4328598876319570  | 0.4316796690828924  | 0.7612274197253684  |                     |                    |                    |
| 0.1503785158419303  | 0.4134061343691058  | 0.4104889569493478  |                     |                    |                    |
| 0.1430572177860222  | 0.4192992035072902  | 0.9143014280303056  |                     |                    |                    |
| 0.43717873695927772 | 0.9136079573758140  | 0.2673262523492034  |                     |                    |                    |
| 0.4352411638975153  | 0.913823597735962   | 0.7679784150250204  |                     |                    |                    |
| 0.6500843705281373  | 0.9141662118417330  | 0.2672944082482197  |                     |                    |                    |
| 0.6504172555154895  | 0.9167269722352860  | 0.7677926837079823  |                     |                    |                    |
| 0.5069739978071225  | 0.556207392488727   | 0.3394471081084572  |                     |                    |                    |
| 0.5087473274176784  | 0.5605432977710351  | 0.8398370919999729  |                     |                    |                    |
| 0.793370855652815   | 0.05822972504315    | 0.0891669881464213  |                     |                    |                    |
| 0.7923023221920692  | 0.0564965784720974  | 0.5889422134770730  |                     |                    |                    |
| 0.7934129636694944  | 0.27133073373503446 | 0.0895677922439412  |                     |                    |                    |
| 0.7933126825268344  | 0.27133624281448226 | 0.5884255600237088  |                     |                    |                    |
| 0.2933483555771030  | 0.5561613164934443  | 0.4458482789112286  |                     |                    |                    |
| 0.2951908842869969  | 0.5603285734182288  | 0.9456248119278884  |                     |                    |                    |
| 0.293511682440624   | 0.5584483155995195  | 0.089509063959412   |                     |                    |                    |
| 0.2935751866907917  | 0.5566429085359675  | 0.5885734004907368  |                     |                    |                    |
| 0.79311558569575551 | 0.0556506685379600  | 0.4465794588679767  |                     |                    |                    |
| 0.7945528528819686  | 0.0588096970713744  | 0.9460970947683907  |                     |                    |                    |
| 0.7937188644740203  | 0.2701548182566987  | 0.3391714327462996  |                     |                    |                    |
| 0.7941233538484630  | 0.2725561884594259  | 0.8390660726951109  |                     |                    |                    |
| 0.5076929989485731  | 0.5588220175128299  | 0.0893774369757691  |                     |                    |                    |
| 0.5063160369585474  | 0.557257161351641   | 0.5870401835051553  |                     |                    |                    |
| 0.793911712786021   | 0.556925441711233   | 0.4451878258035731  |                     |                    |                    |
| 0.7925983545749271  | 0.5582043921342119  | 0.946442582857738   |                     |                    |                    |
| 0.5081205281360951  | 0.0581865356402992  | 0.088598930689392   |                     |                    |                    |
| 0.50799354054515769 | 0.055185565238356   | 0.58937824629571    |                     |                    |                    |
| 0.2936871025291174  | 0.2737290805837457  | 0.0886556401204438  |                     |                    |                    |
| 0.2917989443876978  | 0.2699321942251606  | 0.589506274409685   |                     |                    |                    |
| 0.7938990661403382  | 0.5563792465388364  | 0.3384014190159028  |                     |                    |                    |
| 0.7952516421006506  | 0.5594790154498808  | 0.8393255394166208  |                     |                    |                    |
| 0.3309549546214494  | 0.8731149780260705  | 0.0023290951077618  |                     |                    |                    |
| 0.3297843870504008  | 0.8712455927360840  | 0.5015790116967421  |                     |                    |                    |
| 0.107255666341626   | 0.0929534263443074  | 0.375519990011929   |                     |                    |                    |
| 0.1080187065881204  | 0.0953989764558101  | 0.8581218955962026  |                     |                    |                    |
| 0.3306502271472469  | 0.3831886717251525  | 0.245928165809667   |                     |                    |                    |
| 0.3320391217210937  | 0.3838809983354793  | 0.7441616837816766  |                     |                    |                    |
| 0.6197150635868507  | 0.0937426810436562  | 0.3581357004918495  |                     |                    |                    |
| 0.6281415966377513  | 0.0934507914967056  | 0.8564268590790045  |                     |                    |                    |
| 0.6189040110440245  | 0.0943040781475022  | 0.2459640116822613  |                     |                    |                    |
| 0.6137734431655451  | 0.099562224052326   | 0.7443416660153905  |                     |                    |                    |
| 0.3305215857056832  | 0.8709001590598470  | 0.3572545162624131  |                     |                    |                    |
| 0.3307065973167097  | 0.874374318142009   | 0.8581019322062199  |                     |                    |                    |
| 0.3307855924110398  | 0.82623610294731    | 0.3581092934435107  |                     |                    |                    |
| 0.3194535011794402  | 0.3959791129199180  | 0.8574100048670704  |                     |                    |                    |
| 0.1077365123191264  | 0.3819197461368686  | 0.3575468198299241  |                     |                    |                    |
| 0.1093339984014889  | 0.3845866102243297  | 0.8580185280462445  |                     |                    |                    |
| 0.3309181084712460  | 0.094078866078897   | 0.2449662714144808  |                     |                    |                    |
| 0.3301797260750758  | 0.0941660363148551  | 0.74584849657570884 |                     |                    |                    |
| 0.6197670292095224  | 0.8705459095828663  | 0.3570708427831143  |                     |                    |                    |
| 0.6197539517492272  | 0.873414907571949   | 0.8579630686363274  |                     |                    |                    |
| 0.6131511023543984  | 0.375929986259672   | 0.3545347408988725  |                     |                    |                    |
| 0.6144713902534067  | 0.3793839698610106  | 0.855292217383119   |                     |                    |                    |
| 0.836696382096312   | 0.0869208396853590  | 0.4989724826664808  |                     |                    |                    |
| 0.6134598716135022  | 0.3779792925301726  | 0.1114351999118171  |                     |                    |                    |
| 0.6133500648841783  | 0.3772741818369240  | 0.6095163526098386  |                     |                    |                    |
| 0.3220821307898539  | 0.6000381684847186  | 0.4989938960725608  |                     |                    |                    |
| 0.3252368666217416  | 0.3778206769600733  | 0.1110301783756666  |                     |                    |                    |
| 0.32140948900603790 | 0.376559328966614   | 0.6110998735095983  |                     |                    |                    |
| 0.6124950417219891  | 0.0865768263556134  | 0.499078329242549   |                     |                    |                    |
| 0.8379528073624112  | 0.3758708605244354  | 0.3541435744857170  |                     |                    |                    |
| 0.8382176248296265  | 0.379643694785672   | 0.8535293728118650  |                     |                    |                    |
| 0.6132513521692806  | 0.600557047038428   | 0.4977197431308873  |                     |                    |                    |
| 0.6126399102733635  | 0.6036650262761810  | -0.0008018951953581 |                     |                    |                    |
| 0.8386958211331694  | 0.3766663541789256  | 0.498336925876938   |                     |                    |                    |
| 0.3235112085098481  | 0.603783292404131   | -0.0004602230362758 |                     |                    |                    |
| 0.6144404103386841  | 0.090234948178233   | -0.0012458034159521 |                     |                    |                    |
| 0.3247740121519486  | 0.3800360399345286  | 0.9986217856876451  |                     |                    |                    |
| 0.8368890328990436  | 0.0900740449562314  | -0.0008549162896215 |                     |                    |                    |
| 0.8362045844633017  | 0.3782533006406521  | -0.0003349604539737 |                     |                    |                    |
| 0.972601157486282   | 0.4479359216666511  | 0.3218024349118193  |                     |                    |                    |
| 0.9732285053180270  | 0.4496898501671784  | 0.8233589013581817  |                     |                    |                    |
| 0.9717558039115092  | 0.2380675575714926  | 0.0352349477148399  |                     |                    |                    |
| 0.9714850042990727  | 0.23585853650952587 | 0.5343803665232068  |                     |                    |                    |
| 0.9719246204589895  | 0.0213273883854147  | 0.428425643125457   |                     |                    |                    |
| 0.9723450774425161  | 0.0251485027279413  | 0.9286668564439546  |                     |                    |                    |
| 0.9726189065995449  | 0.234085829159585   | 0.321890937587813   |                     |                    |                    |
| 0.9724598174013332  | 0.2366185634987217  | 0.825258071836105   |                     |                    |                    |
| 0.9719007506765512  | 0.0231752318082085  | 0.0350458318781059  |                     |                    |                    |
| 0.9712359560476879  | 0.0214091715513465  | 0.537777798389836   |                     |                    |                    |
| 0.9722264203555385  | 0.4476991588007301  | 0.4277631874561871  |                     |                    |                    |
| 0.4501045795711626  | 0.927641363512844   | 0.6196348450253520  |                     |                    |                    |
| 0.3850637398785862  | 0.6196348450253520  | 0.738248885293578   |                     |                    |                    |
| 0.783181338154180   | 0.7364585972290277  | 0.6844712750299240  |                     |                    |                    |
| 0.6655292383247726  | 0.7567497696741688  | 0.807009350490342   |                     |                    |                    |
| 0.5123681851935438  | 0.6738011317845127  | 0.7793953364145028  |                     |                    |                    |
| 0.4925065359646171  | 0.7922678676773873  | 0.7922123950389660  |                     |                    |                    |
| 0.3330517152843064  | 0.6347642502687909  | 0.8696792198525108  |                     |                    |                    |
| 0.2833750556125730  | 0.6418370847731732  | 0.8501775205142390  |                     |                    |                    |
| 0.2282434627102262  | 0.6536589166330915  | 0.6798295173243070  |                     |                    |                    |
| 0.1892265763048850  | 0.5733805043867438  | 0.7374535110916958  |                     |                    |                    |
| 0.1303427797823259  | 0.7660919710512886  | 0.7134702701774380  |                     |                    |                    |

|                    |                     |                     |                     |                     |                     |
|--------------------|---------------------|---------------------|---------------------|---------------------|---------------------|
| 0.0799046040144023 | 0.3782841312410067  | 0.4102414806325415  | 0.4374641533125450  | 0.9181694531681287  | 0.0163793948175977  |
| 0.0787498050699764 | 0.381924864485182   | 0.9112879649029465  | 0.4359935964964240  | 0.9130016500084086  | 0.5176168184449672  |
| 0.4369656099905536 | 0.0202318629115956  | 0.2314776352507869  | 0.1509604025621225  | 0.2002974781546579  | 0.2673765273252397  |
| 0.4366907756423295 | 0.0203837502114407  | 0.7320138939390220  | 0.1499895783778774  | 0.2006728820121759  | 0.7681776641796381  |
| 0.611837075049927  | 0.8432545518364702  | 0.3201138962390805  | 0.1507878020459073  | 0.4134385908472129  | 0.2676017478069598  |
| 0.610609847208847  | 0.8462029420346390  | 0.8209532104041793  | 0.1529565019293461  | 0.4151110264997310  | 0.767811230032338   |
| 0.2563565065641638 | 0.2402276427324716  | 0.9993769579053906  | 0.6505343886085346  | 0.9137377876642783  | 0.4101094395212133  |
| 0.2558945871590746 | 0.1992631143913331  | 0.500306386618154   | 0.6520191260729319  | 0.91473599662382453 | 0.9112583919531803  |
| 0.5069383938394749 | 0.4504267259297515  | 0.3566356356800257  | 0.6506002227549830  | 0.1994196739834350  | 0.2676634523460584  |
| 0.5083044366788168 | 0.4540378287003022  | 0.8560717875474918  | 0.6594458120365508  | 0.1959275962106806  | 0.7663292035399342  |
| 0.8645703945520639 | 0.0395339144380089  | 0.0361703974006372  | 0.1504570557619679  | 0.9133995343772321  | 0.4108352875073041  |
| 0.8640010262523232 | 0.0911188101816807  | 0.5358615369012939  | 0.1506214719282829  | 0.9155896006071556  | 0.9114313839146053  |
| 0.6870486895487988 | 0.2722168611690072  | 0.1247016205222904  | 0.4350484734794329  | 0.4150750037306467  | 0.2678272039997188  |
| 0.6883164830218143 | 0.2709003154547272  | 0.6239495211483618  | 0.4327798113285944  | 0.4313682998836923  | 0.761295368418827   |
| 0.6875542728384774 | 0.6277872641682249  | 0.3559386559290185  | 0.1501271676112094  | 0.4137782741607899  | 0.4104618878364837  |
| 0.6893392484917238 | 0.6309414596390226  | 0.8565505268871620  | 0.1435599377770803  | 0.4201526613171208  | 0.9136970620481730  |
| 0.4359399988593075 | 0.3793446165618627  | 0.3205540152177362  | 0.43720346173762143 | 0.9139220207177157  | 0.2672123828442233  |
| 0.6134942135581760 | 0.0896068441190925  | 0.1105852195932834  | 0.4375692545800830  | 0.9143775319442127  | 0.76781520121742955 |
| 0.6121160090343303 | 0.0884737196855224  | 0.6109824332415631  | 0.6498799733243517  | 0.9145761461797672  | 0.2663202215203000  |
| 0.3236189043026703 | 0.3760019733559599  | 0.4991655783018840  | 0.649658053147968   | 0.9172169248105564  | 0.7677732989420134  |
| 0.613400502733075  | 0.6000881155829205  | 0.3541202966968737  | 0.5069065934311759  | 0.556468527234053   | 0.3393631376704303  |
| 0.6133769160924696 | 0.6045110465756325  | 0.8541472645417832  | 0.5090124645179885  | 0.5594903098104792  | 0.8408892996386653  |
| 0.5066905133904593 | 0.8532915746914605  | 0.4451706417562972  | 0.7933025167017862  | 0.0586572117254467  | 0.0891290452070258  |
| 0.5075521016081598 | 0.8540807318950273  | 0.9456923955092119  | 0.7927314416719948  | 0.0561054355272591  | 0.5887737824163986  |
| 0.0884659978157435 | 0.2698198279554725  | 0.3351639106089255  | 0.7931350415792507  | 0.2719271948304134  | 0.0893441452392501  |
| 0.0909372076236802 | 0.2720117273450224  | 0.8348867699098284  | 0.7944383765951339  | 0.270369480500344   | 0.5884882275114033  |
| 0.2861864097613434 | 0.2700501688521176  | 0.2366362164701666  | 0.2932035570504864  | 0.5563780244263972  | 0.4458460302540682  |
| 0.2853973972781669 | 0.2709116267301737  | 0.7356560497348443  | 0.2956394473392493  | 0.5600552150913405  | 0.9457031421962664  |
| 0.5072935563310526 | 0.0478229866353290  | 0.4462504907240731  | 0.2933012318594888  | 0.5589204918476177  | 0.0895894247257898  |
| 0.5091440673483870 | 0.0525341488764209  | 0.9442387703992207  | 0.2937727698244170  | 0.5566144543135203  | 0.58851819733081634 |
| 0.5066418983630604 | 0.2712556590092955  | 0.2370836583541498  | 0.7931461785809129  | 0.0561561685871918  | 0.4462641448373401  |
| 0.510333484816349  | 0.2744288496861977  | 0.737752072322455   | 0.7945800498663542  | 0.0589296460436982  | 0.946087371509155   |
| 0.286344776876074  | 0.851368277288829   | 0.4452028488716331  | 0.7934674973863072  | 0.2707133928404111  | 0.3389180349562164  |
| 0.2855587040708567 | 0.854784891744478   | 0.9463887053975172  | 0.7943004555852263  | 0.2729650484209938  | 0.839633802619770   |
| 0.0878985040014589 | 0.049436539140733   | 0.4453786873243452  | 0.5072086460378746  | 0.5592680163695007  | 0.0893630114851779  |
| 0.089432664727471  | 0.050418659758575   | 0.9461837467580696  | 0.5059722675490105  | 0.5566413407568318  | 0.5874396318713691  |
| 0.5066503112472918 | 0.2705614766171334  | 0.3347540998712188  | 0.7937362888889135  | 0.5567772179259763  | 0.4452828258163734  |
| 0.5107613244836772 | 0.2673551425826062  | 0.8320470283732437  | 0.7927186066730403  | 0.5586802221242538  | 0.9464131611048703  |
| 0.0901700619705177 | 0.2692906102578944  | 0.4454423613866278  | 0.5079116065113599  | 0.0586647176803035  | 0.0885078193522939  |
| 0.089602680495792  | 0.27268859798394    | 0.9460977434213890  | 0.5078132412901855  | 0.05600655963542    | 0.58166890554718    |
| 0.5061743708110282 | 0.2366405937761322  | 0.2366405937761322  | 0.2935580896358336  | 0.2736314073547552  | 0.087118521460220   |
| 0.5063790313512573 | 0.0511432406209824  | 0.7359698363128709  | 0.291788309693452   | 0.2700068363065239  | 0.5893878359769887  |
| 0.5065342735940764 | 0.8523558309364270  | 0.334856395493943   | 0.7937155819577837  | 0.556755713710083   | 0.338519517620536   |
| 0.5075388312154042 | 0.8547421143850201  | 0.8354958364824253  | 0.7956547599664754  | 0.5600104872581960  | 0.8390986566722218  |
| 0.2845532638797198 | 0.26959761284006998 | 0.4459860623578800  | 0.330899454860619   | 0.8735610079850946  | 0.0022660292893243  |
| 0.2821381020715170 | 0.2769052603612425  | 0.9458445230453334  | 0.3299656147616343  | 0.8711288727446080  | 0.501521358324044   |
| 0.4363783386300697 | 0.4208854519007749  | 0.4109176269908079  | 0.1071624532224399  | 0.0934048421087464  | 0.357357594327321   |
| 0.4371960493828394 | 0.4243195819819559  | 0.9107271740736630  | 0.1084002446795990  | 0.0956278943716726  | 0.8581579160306817  |
| 0.8560107545726896 | 0.2019568683172791  | 0.0217828675113805  | 0.3304281595133382  | 0.3834656733700867  | 0.2459120321157269  |
| 0.8551528456485233 | 0.1997776466434147  | 0.5214258415257607  | 0.3336277226244311  | 0.3819455247089186  | 0.7444486265045031  |
| 0.6576221488098265 | 0.2023479920722950  | 0.1199956811141523  | 0.6193738140884937  | 0.0943218205778973  | 0.35794178073652528 |
| 0.6592798818247585 | 0.1996702066168515  | 0.620100160549607   | 0.6291258309185164  | 0.0926820292073666  | 0.856415518004516   |
| 0.4373009866623611 | 0.6175002314489798  | 0.4110110591363663  | 0.6188802355841851  | 0.0946774544180800  | 0.2458647453071702  |
| 0.4394982326228626 | 0.6211285262393493  | 0.9125350203970785  | 0.6192412063563733  | 0.0982984619601359  | 0.3474832623636056  |
| 0.4373371745030377 | 0.423875159593751   | 0.1199678206719240  | 0.3304390963888946  | 0.8708907478690011  | 0.7571376776762020  |
| 0.4385867639510772 | 0.4195014960244274  | 0.6172146075635770  | 0.3305862320949265  | 0.8747070676992134  | 0.8580949738741108  |
| 0.6588283869670356 | 0.1399751608594470  | 0.4106386472509694  | 0.3304054153192187  | 0.3831266293921970  | 0.3580393478659870  |
| 0.6503013652763596 | 0.2013450642174545  | 0.9100803137716298  | 0.320221169086514   | 0.3941466700958899  | 0.837198696978042   |
| 0.8545298214330983 | 0.2002798595946611  | 0.4106438468083735  | 0.10742744540281173 | 0.382453719285030   | 0.357465633967322   |
| 0.8544059436220313 | 0.2039659592888681  | 0.9112158248825857  | 0.1090163363602462  | 0.3845308341830319  | 0.8579371554453120  |
| 0.4369801420534671 | 0.6206506589266634  | 0.0222399960211853  | 0.3307331992943704  | 0.0941984558880819  | 0.2449175488913080  |
| 0.4372194947217599 | 0.618427857764546   | 0.5198401027263925  | 0.3302786904853123  | 0.0940397185582877  | 0.745541359649206   |
| 0.8548600709354988 | 0.4216705144117327  | 0.4104812349480303  | 0.6195912848765104  | 0.8705375277993765  | 0.3571199545621830  |
| 0.8532167343228887 | 0.4232514351158668  | 0.9115289559710834  | 0.6202529894901219  | 0.8740926655368010  | 0.8576317966031670  |
| 0.4368397189018390 | 0.2012832566879644  | 0.1201603846920412  | 0.6128891718347145  | 0.3763354588281629  | 0.35444770700596394 |
| 0.435209483423037  | 0.2001181457896425  | 0.6200092027894492  | 0.6142116591568436  | 0.3788298759974066  | 0.855168100694936   |
| 0.437080584197575  | 0.2041296604424880  | 0.0214411325147740  | 0.8368200561742580  | 0.0872478354490453  | 0.49873873440031362 |
| 0.4359633830921742 | 0.1992548492973496  | 0.5222113129793058  | 0.6131869663808132  | 0.3785660346375302  | 0.11126020391997365 |
| 0.6588483582604997 | 0.6187452043031200  | 0.4101890364512223  | 0.6147468197102584  | 0.3767548371112252  | 0.6083551217223011  |
| 0.6587651047987212 | 0.620910239102023   | 0.9111393134780059  | 0.3224468850984362  | 0.6001781353211473  | 0.4988326325393837  |
| 0.4725837670190941 | 0.0266223214251561  | 0.033424961847219   | 0.3250551243210310  | 0.3782742961822494  | 0.1107972133977888  |
| 0.4717447365220093 | 0.0206233068616279  | 0.5354729595931486  | 0.3202524409252065  | 0.3765767922921256  | 0.6115112088522970  |
| 0.2584799235450433 | 0.2375168191505670  | 0.1779760495402913  | 0.61265924833459496 | 0.0869128907616408  | 0.4988141383975430  |
| 0.2570433142173680 | 0.2341554156760868  | 0.6787356809349258  | 0.8376479780325671  | 0.3765039805148480  | 0.3539096180790303  |
| 0.6850056394781077 | 0.7354491429239080  | 0.42770918613635936 | 0.8386486293798936  | 0.3798901503045237  | 0.8534776395403219  |
| 0.6858938624708602 | 0.7376915056322674  | 0.9279946585969036  | 0.6132741993912257  | 0.600634086062787   | 0.4979138618666221  |
| 0.6842355464518493 | 0.0237552461837559  | 0.178149058198483   | 0.9711706639290828  | 0.603599695985737   | 0.99922239319444505 |
| 0.6847238027932836 | 0.021515340080386   | 0.6782076934821250  | 0.8368961676807265  | 0.3764350780319525  | 0.4984151732184400  |
| 0.2576729402370026 | 0.447694525888225   | 0.4289787659790953  | 0.3231694054968078  | 0.6033955972053564  | 0.9998709304809496  |
| 0.2560080053031531 | 0.45449971065004773 | 0.9288921975507298  | 0.6142841571640887  | 0.0906729293765940  | 0.9986712565280319  |
| 0.4717217539817341 | 0.7351607508773095  | 0.3219500165347713  | 0.3233885670358096  | 0.3802213004534923  | 0.9987933650176721  |
| 0.4709713140315515 | 0.7375033112189984  | 0.8235326750014570  | 0.8368971973114696  | 0.0900443866261963  | 0.9991470605180762  |
| 0.4712280731494417 | 0.4499815186025510  | 0.1785779791056734  | 0.83592903189173847 | 0.3786046637354776  | 0.99939184278002482 |
| 0.4711938184756663 | 0.4484697146410809  | 0.6751217653875403  | 0.9723377779185630  | 0.4484530980706064  | 0.3217288781445591  |
| 0.6849722048545028 | 0.235404083041738   | 0.3216088082972694  | 0.9737608035350418  | 0.4501260760424545  | 0.8228157900200169  |
| 0.6870713893494885 | 0.2383685221175680  | 0.8206653186501192  | 0.9715004209712362  | 0.2386693807790941  | 0.0350622641778485  |
| 0.2592080151275639 | 0.7380444151180408  | 0.0355348395450551  | 0.97203344743       |                     |                     |

|                    |                    |                    |                      |                     |                     |
|--------------------|--------------------|--------------------|----------------------|---------------------|---------------------|
| 0.2278013356729210 | 0.7027426823810540 | 0.8438351100276575 | 0.7960741305181216   | 0.1645544922430844  | 0.7340759516886948  |
| 0.3535545360069556 | 0.5891957687285134 | 0.7486115008280193 | 0.7145032619853396   | 0.2553738661307031  | 0.6660760272791296  |
| 0.4218877501633823 | 0.6226757266711218 | 0.7024793901434785 | 0.7681393326165112   | 0.3458161708992122  | 0.9951789883994095  |
| 0.2628847787043251 | 0.5920870237296180 | 0.7536134361929779 | 0.6738173240780441   | 0.2600989953063220  | 0.9476949353157096  |
|                    |                    |                    | 0.7892927040075008   | 0.2158221009881416  | 0.0042514296622613  |
|                    |                    |                    | 0.5832403944404163   | 0.3514676393122536  | 0.9853198597650490  |
|                    |                    |                    | 0.5757434500847135   | 0.2812440758108827  | 0.8221640324691800  |
|                    |                    |                    | 0.5883982047062496   | 0.2603009019175914  | 0.6288830915018211  |
|                    |                    |                    | 0.5509735631553376   | 0.1631295272820892  | 0.7490949237802614  |
|                    |                    |                    | 0.6667775169525538   | 0.3413952549192264  | 0.5350943910404870  |
|                    |                    |                    | 0.9635128627873542   | 0.0719842390810257  | 0.6208910779042561  |
|                    |                    |                    | 0.8418260407066356   | 0.0484440621047426  | 0.677558604258478   |
|                    |                    |                    | 0.9019818210002128   | 0.9615942281126451  | 0.5651648458149765  |
|                    |                    |                    | 0.7771754012724088   | 0.0568757724802396  | 0.8417288320117464  |
|                    |                    |                    | 0.7128661790893602   | 0.072205373023712   | 0.673564882525683   |
|                    |                    |                    | 0.7504641097375853   | 0.9652388502470330  | 0.974645086637323   |
|                    |                    |                    | 0.6644575884817812   | 0.0620654409584986  | 0.9371511135829635  |
|                    |                    |                    | 0.5780312502142237   | 0.9659487311758923  | 0.974625500670919   |
|                    |                    |                    | 0.5617088115444844   | 0.0421037411561258  | 0.8202155132185666  |
|                    |                    |                    | 0.5865811945148778   | 0.0634440045948637  | 0.6316267707782686  |
|                    |                    |                    | 0.6678644282201560   | 0.9666477853754927  | 0.5760358141703392  |
|                    |                    |                    | 0.4704090113845751   | 0.1646781573122524  | 0.1131550604992668  |
|                    |                    |                    | 0.4687983247020139   | 0.6663266848798328  | 0.6997659444369669  |
|                    |                    |                    | 0.967196245819593132 | 0.7653505356719350  | 0.2031425516152723  |
|                    |                    |                    | 0.9772365863438708   | 0.1745448708003963  | 0.1981296776798800  |
|                    |                    |                    | 0.472526836435251    | 0.2652719265461718  | 0.703196330045745   |
|                    |                    |                    | 0.4685177314018389   | 0.7653454160573148  | 0.1116594046255486  |
|                    |                    |                    | 0.9646571146420207   | 0.6710998865612652  | 0.6165694853891317  |
|                    |                    |                    | 0.5973588174420073   | 0.1553872319664009  | 0.152087628898659   |
|                    |                    |                    | 0.3425078042650380   | 0.6552471863107483  | 0.6594010077252170  |
|                    |                    |                    | 0.0918658461488846   | 0.7682566880434791  | 0.1505974972099864  |
|                    |                    |                    | 0.0968749805368248   | 0.1520951313241099  | 0.1349463931336272  |
|                    |                    |                    | 0.3500199821395475   | 0.2654870460672652  | 0.6475741475741223  |
|                    |                    |                    | 0.5845094730156575   | 0.7678825259881629  | 0.1921010698972125  |
|                    |                    |                    | 0.8479237279409304   | 0.6532407545948615  | 0.69090024478077064 |
|                    |                    |                    | 0.5456300152491664   | 0.0913859376482193  | 0.0003752212922166  |
|                    |                    |                    | 0.3947623235158595   | 0.5889068138314594  | 0.8085482196075096  |
|                    |                    |                    | 0.0510816303410380   | 0.8414462279150214  | 0.3012908613069030  |
|                    |                    |                    | 0.0527714886460871   | 0.0881970871047457  | 0.2917494267254028  |
|                    |                    |                    | 0.3885243869757083   | 0.344669125178749   | 0.7914545718322293  |
|                    |                    |                    | 0.587926419305022    | 0.446669157806314   | 0.0420016582231995  |
|                    |                    |                    | 0.8840079197876491   | 0.5841602664525709  | 0.5342304174743049  |
|                    |                    |                    | 0.5545103912776383   | 0.2226448373023686  | 0.9942724807635841  |
|                    |                    |                    | 0.3835773398562804   | 0.7197236448614885  | 0.8215574975457825  |
|                    |                    |                    | 0.0561903749086144   | 0.7103031335474341  | 0.3187670925951565  |
|                    |                    |                    | 0.0799768228269855   | 0.2167171922430811  | 0.302008593843696   |
|                    |                    |                    | 0.3842641668090316   | 0.214887286242042   | 0.8236727579586981  |
|                    |                    |                    | 0.5698813681736468   | 0.7176410007905147  | 0.0120026463289307  |
|                    |                    |                    | 0.8595541733960346   | 0.7126626281126462  | 0.5181549461086661  |
|                    |                    |                    | 0.6567539665940103   | 0.1496124389822100  | 0.3239868324522774  |
|                    |                    |                    | 0.2782411188656796   | 0.6504595971503481  | 0.4918318952459306  |
|                    |                    |                    | 0.1642792372827202   | 0.7730578804481883  | 0.9911540613803211  |
|                    |                    |                    | 0.1563317867825376   | 0.1575467681324128  | 0.9654015748898672  |
|                    |                    |                    | 0.2908769632161409   | 0.2573353758243647  | 0.4775345742546453  |
|                    |                    |                    | 0.6459222336836277   | 0.7650531977276292  | 0.3602087704845829  |
|                    |                    |                    | 0.7889191260773458   | 0.6658903070158075  | 0.8606532356828183  |
|                    |                    |                    | 0.6477102887700836   | 0.26429525616279066 | 0.2299499548181346  |
|                    |                    |                    | 0.2947032412941267   | 0.7658731985966535  | 0.5833171738630711  |
|                    |                    |                    | 0.157669441347895    | 0.6612284462450617  | 0.9487297400880803  |
|                    |                    |                    | 0.1528290786551381   | 0.2648564624505951  | 0.080033932452280   |
|                    |                    |                    | 0.2799116153023498   | 0.1589403346205208  | 0.680652192959314   |
|                    |                    |                    | 0.6563042456418871   | 0.6630901373962441  | 0.208512266667730   |
|                    |                    |                    | 0.7849076939014665   | 0.7648852270750979  | 0.7302919589574159  |
|                    |                    |                    | 0.7267366825954440   | 0.1706157820158083  | 0.1628722858094227  |
|                    |                    |                    | 0.213648267491444    | 0.6765543866851261  | 0.656285431768416   |
|                    |                    |                    | 0.2215791155045039   | 0.7638014501976258  | 0.16439284273430253 |
|                    |                    |                    | 0.2270840787661967   | 0.1616388247035587  | 0.1278574237885479  |
|                    |                    |                    | 0.2197335052639107   | 0.2724682804682449  | 0.6390372825385089  |
|                    |                    |                    | 0.7149550675288623   | 0.7764423399209477  | 0.19433103281938446 |
|                    |                    |                    | 0.717755076995443    | 0.6549212559953185  | 0.6935195960840544  |
|                    |                    |                    | 0.6718197466388318   | 0.0816288409585013  | 0.4877677117019666  |
|                    |                    |                    | 0.2625165906486387   | 0.5893526221026727  | 0.3219268124075612  |
|                    |                    |                    | 0.1663043926363770   | 0.8430046073616637  | 0.8288882704845832  |
|                    |                    |                    | 0.1735328795382571   | 0.0848091446146242  | 0.8066187549192350  |
|                    |                    |                    | 0.6644850029993989   | 0.8462672666304345  | 0.5155356739353891  |
|                    |                    |                    | 0.7703944724560827   | 0.5862288799406692  | 0.0127813542584434  |
|                    |                    |                    | 0.771077866583174    | 0.5161720355731649  | 0.4155391906020540  |
|                    |                    |                    | 0.1673626038170514   | 0.6657113920477359  | 0.3905759856111402  |
|                    |                    |                    | 0.2667247017068846   | 0.7638923051383415  | 0.869179529217321   |
|                    |                    |                    | 0.2685960494534945   | 0.1653657788043503  | 0.8077424608663742  |
|                    |                    |                    | 0.1714504091507168   | 0.2760078184454802  | 0.4864552538366451  |
|                    |                    |                    | 0.7643751946318138   | 0.7873637201086933  | 0.4305115464023501  |
|                    |                    |                    | 0.6710691419236596   | 0.6548206323122514  | 0.9357677871835883  |
|                    |                    |                    | 0.6689226336629824   | 0.2138442166799008  | 0.4926203087986391  |
|                    |                    |                    | 0.2778759836389346   | 0.7201738030202961  | 0.3286690369900664  |
|                    |                    |                    | 0.1525684065302428   | 0.7118245041996047  | 0.8211557514684316  |
|                    |                    |                    | 0.159623085982813    | 0.2148992416007900  | 0.7912408552863468  |
|                    |                    |                    | 0.2593760588064545   | 0.2136288416949380  | 0.3008657167056815  |
|                    |                    |                    | 0.6751940715154821   | 0.7126824926934400  | 0.5353557551740099  |
|                    |                    |                    | 0.7641751638518031   | 0.7155007851284552  | 0.037344071909876   |
|                    |                    |                    | 0.8660566697659462   | 0.0764119199110667  | 0.4897391698972129  |
|                    |                    |                    | 0.0793709256088277   | 0.5802108201581007  | 0.3205944507342124  |
|                    |                    |                    | 0.3632989391694892   | 0.8492645069664064  | 0.8297326068663734  |
|                    |                    |                    | 0.3658043909904620   | 0.0841533974802380  | 0.8214786989721006  |
|                    |                    |                    | 0.7820315102096682   | 0.34746003297430807 | 0.3228662326725384  |
|                    |                    |                    | 0.8637117025797272   | 0.8448618234683778  | 0.5038653075624609  |
|                    |                    |                    | 0.5705431687132361   | 0.5858179762845879  | 0.001683590881063   |
|                    |                    |                    | 0.8886358363939877   | 0.1496632378952540  | 0.334096334872811   |
|                    |                    |                    | 0.0568990213808789   | 0.6437472398715443  | 0.4862160679148317  |
|                    |                    |                    | 0.3659531788115729   | 0.7800074838487446  | 0.9930943370778280  |
|                    |                    |                    | 0.3698128028191334   | 0.1481488689723349  | 0.98948675078560949 |
|                    |                    |                    | 0.0495246201255455   | 0.2705295598814246  | 0.4732105548481836  |
|                    |                    |                    | 0.8821943704751405   | 0.7711141763339953  | 0.3480507692364156  |
|                    |                    |                    | 0.5571964465918424   | 0.65622100485883345 | 0.8417102446099112  |
|                    |                    |                    | 0.8549081850326203   | 0.1546499514822131  | 0.1449554651248164  |
|                    |                    |                    | 0.0857344981944479   | 0.6569421759387382  | 0.67578419152628493 |
|                    |                    |                    | 0.3507809242761937   | 0.7662408602272706  | 0.18483995210719502 |
|                    |                    |                    | 0.3511487758904721   | 0.1639810177865613  | 0.1816700534508087  |
|                    |                    |                    | 0.0903788952566771   | 0.2803229383893253  | 0.65935896226137991 |
|                    |                    |                    | 0.8431267558738966   | 0.7774331071146250  | 0.1616012581497799  |
|                    |                    |                    | 0.5919539395620650   | 0.6510416402157427  | 0.6530945910965457  |
|                    |                    |                    | 0.8857058994999178   | 0.2646521800395263  | 0.2418751530102767  |
|                    |                    |                    | 0.0537084994999178   | 0.6236244464043197  | 0.5682184352422907  |
|                    |                    |                    | 0.3915027495817046   | 0.6646524525390669  | 0.0706708058801972  |

0.3910664036581803 0.2649548463019410 0.0692532516161123 0.5546628988548170 0.1358077999254866 0.0969958000206133

0.0551781596948260 0.1638614417490132 0.5873602233480213 0.4050138939828839 0.6352718713982348 0.7749438046067660

0.8856982107391715 0.6643020595355722 0.2353972080029365 0.0509604782614204 0.7475948859249665 0.2727766143878971

0.5556775732149296 0.7645904540409097 0.7318202913885854 0.063326068897095 0.1379542117032618 0.2680746465008289

0.7756638489632998 0.0862499402173924 0.0320394406020554 0.4084020289925708 0.2457429010647230 0.7785041207687303

0.1673625020283040 0.5845622618677053 0.7785848159324544 0.5542964110577506 0.7527240365003914 0.116648720806019

0.2775602593114215 0.8477462119660477 0.2886177149779741 0.8970032428486669 0.6337296492148290 0.6191286788391782

0.268760711938069 0.085793949960548 0.2749688487518327 0.6694764782479069 0.1625115733421748 0.2476347146799516

0.1681270368322458 0.3466468926928788 0.777303277553047 0.2889286787484557 0.6643556960796458 0.6282795220709698

0.7657007306367376 0.8469374269268783 0.0489574300293683 0.1702680735682412 0.7163197693830270 0.1323485547777611

0.6741965203072080 0.5817622729155929 0.5479779277195566 0.1722001005533301 0.16387496573040967 0.1136287140668335

0.4824327973557618 0.3544435944832239 0.1115579520560732 0.2921994864447298 0.2139298810166946 0.6292635483404699

0.4645676318702812 0.8570911880928875 0.7041444939794417 0.6604405797513014 0.7191775955619566 0.2729485135351311

0.9756754236628922 0.5719100743577101 0.2005080737885478 0.7920803783293606 0.6619706426516493 0.7479880949797190

0.9762756981563498 0.3551873930335958 0.1996822554331885 0.7030813348570615 0.1270487999729645 0.4626910639575736

0.4651541248457320 0.0705622370118138 0.6953539036710694 0.2535021596550120 0.6345000469559317 0.4115643645154672

0.4719336330296221 0.5669710277087617 0.1279457741016021 0.1952359748904410 0.7484027158740026 0.9079954203331001

0.9664911537058174 0.8536168441205518 0.6226739711453746 0.2017239055203844 0.1310981465926816 0.8937741511722258

0.6011181255415593 0.3802646132575923 0.1758299068543660 0.2622140863132229 0.2541557479666745 0.4130521628276031

0.3454828132567536 0.8798086861166041 0.6411151666666667 0.6970231397959924 0.752652648208033 0.4877871495490360

0.0935998675157350 0.5496064383399215 0.1319066425110123 0.7551873225535657 0.6322913958054959 0.9931353510069336

0.0941992546717927 0.3763754570155835 0.13220200034508071 0.8603369839910742 0.1250221139280352 0.4689250573200752

0.3446640362069915 0.04727398073129969 0.6349989076524052 0.0969876526278770 0.6278832932082625 0.4083395497765409

0.5926917014439211 0.5523918876629266 0.189186779109875 0.3523003866167998 0.735357098344045 0.905635616868664

0.8485403034805117 0.8766317570158080 0.6925691374449343 0.358848676884954 0.1278786016792993 0.9122354740048261

0.5434602314751402 0.4662044612111689 0.0600203534209534 0.1071842078799998 0.2580312232568009 0.4103434243125310

0.400459880031689 0.9655472049496074 0.7630570581497835 0.8520531703460772 0.7546744608787345 0.4794205980125894

0.0413341629867361 0.4633185149209496 0.2560666588105747 0.5977775595959917 0.6316986010484764 0.9773908891371794

0.6601013860662032 0.3695686228562967 0.3451544667749678 0.9122794032162759 0.1648833462799728 0.2617620308863707

0.2780604208389690 0.8795570722332038 0.4791982864170308 0.04894243001312090 0.6596498604100736 0.6172040068165558

0.161691496118866 0.5599307334980210 0.970018976988263 0.4047957186760878 0.723732233654561 0.1158967004069934

0.1577734905500634 0.3712212360177887 0.9667605352422939 0.4076754522090403 0.162506817984365 0.121097417982032

0.2829656698128744 0.0674380362154139 0.4667015784140958 0.05221127368581995 0.2216759286907957 0.6187030732962525

0.6556747453759562 0.5606838676884333 0.3570491777107773 0.9033501967468527 0.7208660503216962 0.2659944780058357

0.7834250062542196 0.8646041683300413 0.8576798200440550 0.5523170529848106 0.6630852462204385 0.7609213987052560

0.7309646484700801 0.3602738165658833 0.1824777597230672 0.7980509270519003 0.1353891369449057 0.116295641876768

0.2162834944767908 0.8603206710454527 0.6495642699760323 0.1630973739369744 0.6324171725119979 0.7639848605844716

0.2230745453605833 0.553010557390608 0.141104756838928 0.2918264305888372 0.7518815351042853 0.2702198820122408

0.2246090103143509 0.3684549381869713 0.1342638125760099 0.2894362184182684 0.1361004866735844 0.257588976033849

0.21380159482926055 0.0472389418479230 0.627390389338981 0.1702117662435737 0.254039586849134 0.735827501975271

0.7235990217612089 0.5558943032415068 0.1911443089560639 0.7807306280435644 0.785985042724514 0.1375621823579201

0.7179495505634463 0.873036390584966 0.6893490516886906 0.6735561663729684 0.6289235476925785 0.634485524967216

0.6888057190369981 0.4624722644504793 0.4762389402214085 0.5628189150868350 0.3649434918413024 0.1132060265243445

0.2503662463266139 0.967694209849839 0.3479099165932453 0.4037018138196165 0.8643603981219041 0.7611534204905076

0.1939002698352681 0.4655987428359651 0.8420113050660802 0.0553564826355277 0.5195864908182016 0.2550260921543499

0.7556842612312997 0.3668101704393876 0.4357273369466503 0.0573857132944425 0.3633135785787501 0.2598399471325971

0.1655460979756995 0.8691762908596843 0.3829734330396448 0.4050514497991499 0.0196215435685029 0.7608948306548091

0.2764053449733765 0.5655376263952582 0.8808552229809123 0.5522319163640238 0.5200072542983342 0.1253001659987415

0.2761549718854326 0.3672701377315335 0.8846546877386174 0.90670772217476293 0.8617800552392154 0.6224725802621877

0.1640975420816133 0.0630561270751002 0.3874742974302521 0.6711580783955160 0.3201948888546849 0.2628371383135077

0.7757542433317710 0.5570708656690625 0.4308812669965091 0.2916961947605859 0.8229077414600720 0.6194949469799748

0.6640430568864062 0.8702411282312287 0.9310420628487535 0.1712739850656474 0.5567850768489498 0.1181272413320802

0.8625707118174191 0.4625138606225292 0.4756805224669591 0.1729073164131066 0.3243919848354335 0.1210438969724877

0.0796715577113218 0.965735639526897 0.3439233430249615 0.288605799805476 0.0565767184969579 0.6191315455829842

0.3588292359698499 0.465968780632151 0.8427519913362715 0.665598035270522 0.5597523316115867 0.2732671870330519

0.8813830491256311 0.3829143066699601 0.3255139820117492 0.7956151360105567 0.3271398072661449 0.7701462435027059

0.0566778807794037 0.881180540644277 0.4879880362707990 0.7073275203327123 0.3625164601099002 0.4793177923635897

0.3806549763247702 0.5459961097826067 0.9931420798516153 0.2544668377489511 0.8674725808935718 0.4015282087902740

0.3903149378618626 0.796949730336003 0.9798445416299506 0.2102853014321628 0.939849012158388 0.8993171113252499

0.005096177964589 0.0543528457213455 0.4801621552834528 0.2108315060662315 0.3645812740217536 0.905662252836466

0.8915923298139390 0.5556407106719377 0.3445481563142465 0.2538252973202919 0.0226540540842730 0.4014622418830671

0.5466813542555329 0.8683189486166043 0.8510299863436117 0.7069124574133189 0.5171755574650210 0.4832005577424158

0.8560971545581424 0.3708439499550500 0.1349125742290767 0.7532717821512972 0.8656257904950445 0.979454510613320

0.0886508996887443 0.8661659872035885 0.6765813784875192 0.8615214912000297 0.3653246039177885 0.469012553479410

0.3489219320834285 0.5678602143167987 0.1816417130871180 0.0996980736687331 0.8660293334526334 0.401917314734480502

0.3624501183517338 0.3727965453435183 0.1741280571341453 0.363358496378915 0.5181316793786089 0.90698187434486811

0.0868306189958261 0.0496223212460162 0.6688504408604975 0.3647527734809478 0.3650952733460662 0.9069164557068915

0.8515536025187558 0.5498619366106752 0.1573451701908937 0.0985645599578505 0.0201327781050372 0.4066373594540718

0.5894211345346818 0.8823313287114640 0.6658744060939376 0.8610139435527633 0.5181309086624969 0.4755208423711057

0.7716393654788476 0.4630731787162059 0.0750101851688711 0.60022327766124412 0.8661561178037521 0.9792240906188178

0.1641670847303800 0.9608098573616601 0.7515545252569878 0.9083447942490319 0.3212872039495058 0.2583733262988517

0.2853669111602047 0.468438974690144 0.2629022252081579 0.0537096786449556 0.8164120301685976 0.6137013943907461

0.2747609868136671 0.3418271419807727 0.3314092374334903 0.4080709407337323 0.5669683320585324 0.1172469844158902

0.2831896565681822 0.3852160273757209 0.2216659758994734 0.416229395712544 0.3189976595236612 0.1152129867860265

0.4344241955824109 0.5359469281602869 0.3096550488989850 0.0510270380626238 0.363896734791707 0.6204242826573820

0.3806549763247702 0.5459961097826067 0.9931420798516153 0.9084668784224627 0.062373487041983 0.263088906101650

0.3508843654353531 0.454391456887333 0.33816505794652687 0.2102853014321628 0.8208466092440866 0.77052280276708

0.3730239785137969 0.4407438910548812 0.4645005179127070 0.7916435998130885 0.3610236338884341 0.1258444167770932

0.4617560517919685 0.41490280384334 0.2849636289688909 0.1678143881244185 0.859798979022700 0.5864851878380406

0.4828771812950875 0.3301424079929319 0.4191559225094514 0.2903606108156795 0.5229524363062488 0.2563394958574660

0.4367249863015953 0.300625464346923 0.319287799447037 0.1692047011742866 0.0129503683811194 0.750449112366809

0.3962355742420977 0.3217348246091158 0.4339961222888503 0.7860682091367958 0.5150781063752685 0.1388031118939199

0.5194737476225060 0.510476047891875 0.4369352917925489 0.6707857715916823 0.8670844170925648 0.6408149496661259

0.5110676304004169 0.625856428804576 0.3657488573387366 0.9771441724665453 0.2382185303822023 0.6509094341398290

0.538248000406236 0.6280702256790557 0.4898154254779704 0.8526862471635978 0.2560730731030921 0.69384386982013

0.4559136091638176 0.6481415879129157 0.4614062490077234 0.9039539887204109 0.3162825048436919 0.538546178297298

0.4641160871477412 0.53282610616494 0.5312753381525681 0.886128204062970 0.1858759080586864 0.5359489113457326

0.4200701425715795 0.5262277170683654 0.3860885390923768 0.787832576796038 0.2530233639993404 0.8602612752097446

0.3961595160819879 0.4547351874335711 0.3945975433649841 0.8055279473427417 0.1416956543737001 0.7583782124326791

0.4322032709923833 0.4038630217963865 0.3493656392222234 0.7245406584889443 0.2336639424882011 0.693222409545687

0.4347018385319171 0.335087454190227 0.3814336018352439 0.7794239317744064 0.3220544446156385 0.0232268078056266

0.4774823396799572 0.5428764663157909 0.454270780664937 0.6844063679209683 0.2370443875634542 0.9778334267720099

0.4969229148672188 0.6153112851749271 0.4420965158937565 0.8002460234024090 0.1920199861845499 0.0314173785816300

0.594792444181022 0.3289817700374965 0.0165760940784676 0.5855050147094503 0.2581571165309783 0.854161684930735

0.5975021377828051 0.2364826618883795 0.6611218118585727 0.5631585590021770 0.1389737462757507 0.7872505931283916

0.67251523692703406 0.3188864682818603 0.56472561578022037 0.9751829043775906 0.049602069815960 0.6508368417024539

0.85414141144169643 0.0251404035941039 0.7099263428420193 0.9128385464416842 0.9393481798729414 0.5941529451906278

0.7898672911202403 0.0375240433561587 0.8743995288817287 0.7245509710311071 0.0453265758321786 0.7059555169907210

0.7631177121748308 0.9433832128798353 0.0041445853701151 0.6768106278723779 0.0403951537264390 0.9689877752353138

0.5911341491969895 0.9436234053871705 0.0072996647758486 0.5746675755215614 0.0179196644418401 0.8517824789114742

0.5981822555339181 0.0405971643844185 0.6629497760264456 0.6772811831705986 0.9430750572397302 0.6039237920778837

0.4826565135925681 0.1404637990323723 0.1469185983191669 0.4773360658467395 0.6467918281628356 0.7275895897140906

0.9765017863070756 0.74225839171506 0.230881493521811 0.888879644099825 0.5488105293056304 0.2337836631417001

0.4821963344332101 0.2386591790863212 0.7370185547182754

|                     |                     |                     |                     |                     |                     |
|---------------------|---------------------|---------------------|---------------------|---------------------|---------------------|
| 0.4764176304967728  | 0.7544829077367879  | 0.1393859949546192  | 0.4087587720129124  | 0.9418839277236363  | 0.7901797948714795  |
| 0.9727417881893183  | 0.64899739167461942 | 0.6466949397123227  | 0.0526645427157220  | 0.4420268004871940  | 0.2836003923075463  |
| 0.6102573003443948  | 0.133111884012207   | 0.1824234950255859  | 0.6721760102994599  | 0.845792619375587   | 0.3747200214310506  |
| 0.3514441524661876  | 0.6331058417234396  | 0.6863164730468404  | 0.2831786517551455  | 0.3522574558931409  | 0.5101012082894186  |
| 0.1006442154895254  | 0.7372035520413161  | 0.1809763223820298  | 0.1753709413279410  | 0.5378545421700500  | 0.0029197074743754  |
| 0.1087249952775096  | 0.1336400532735241  | 0.1705644288798321  | 0.1742846518309285  | 0.3524090282531991  | 0.0088262951015469  |
| 0.3590368442145964  | 0.2343653700101327  | 0.68642138265267418 | 0.2920453341118677  | 0.0418868164772898  | 0.5023530736798379  |
| 0.5919441653672473  | 0.738745256283743   | 0.2194585159255645  | 0.6627528082341233  | 0.5374049278867556  | 0.3878812571558895  |
| 0.8555416815647792  | 0.6297974206397298  | 0.7029422719115665  | 0.7965356288766834  | 0.8447216477172188  | 0.8842726497035790  |
| 0.55733529701677755 | 0.0690233583029233  | 0.0306148238187927  | 0.7410173343849982  | 0.3355843106519252  | 0.2103604052764728  |
| 0.4050150592017666  | 0.5645674082521456  | 0.8317380290559971  | 0.2290903533349371  | 0.8414256346500151  | 0.6874051938502767  |
| 0.0614260096055985  | 0.8198192017745426  | 0.3228949415252392  | 0.2295860913433979  | 0.5198988163579966  | 0.1789623531561233  |
| 0.0636566819392717  | 0.0672802711919554  | 0.3255777146991526  | 0.2329036900423980  | 0.3513029577360111  | 0.1847293635618624  |
| 0.3992492056304013  | 0.3197966075056333  | 0.8228013961324294  | 0.2255001239123685  | 0.0188681525022070  | 0.6658482264860340  |
| 0.5768118685259136  | 0.0741005071787607  | 0.0741005071787607  | 0.7301403040675200  | 0.5281844306216926  | 0.2218369141848240  |
| 0.8917014070982398  | 0.56343030746537890 | 0.5622389376061153  | 0.7308673879574937  | 0.8503464043563278  | 0.7151124949170937  |
| 0.5653911997459421  | 0.200350912930612   | 0.0272849472026558  | 0.6975762216384864  | 0.4397889971347828  | 0.5076446987196801  |
| 0.3905342676129162  | 0.6947954375640109  | 0.8520467599596527  | 0.2640830112725725  | 0.9449578980107306  | 0.3763202313488053  |
| 0.0614231818620297  | 0.6897983927991002  | 0.354534589593722   | 0.2046988351025054  | 0.4419322324795213  | 0.8746978094399381  |
| 0.0916545323357331  | 0.1953716823582943  | 0.3969278347713304  | 0.7846664398545496  | 0.3432588890590264  | 0.4737472339072619  |
| 0.3966802332678308  | 0.1907411076481742  | 0.8637491571301744  | 0.1772410312467363  | 0.8466977436019726  | 0.399230909411073   |
| 0.5704565095967749  | 0.6959127400247457  | 0.0357610201152205  | 0.2871152585865930  | 0.5423210355586310  | 0.9045197943592678  |
| 0.8671968741136422  | 0.6924050288665577  | 0.5509676059172032  | 0.2979395343156924  | 0.3437435109969259  | 0.9152167011879662  |
| 0.6700126883936816  | 0.12584986109743568 | 0.3540737687585075  | 0.17652072329058414 | 0.0389443615334252  | 0.415033811809933   |
| 0.284966023232119   | 0.6280394610701868  | 0.5214978462582841  | 0.7833898725265265  | 0.5350829971506801  | 0.460136790097479   |
| 0.1733263364594155  | 0.7463699070287986  | 0.022194966277862   | 0.676562793612161   | 0.8493848177384594  | 0.954038915501573   |
| 0.1691240285251632  | 0.1352895543898025  | 0.0020488881297744  | 0.8702280812472496  | 0.4411319583160586  | 0.506926374773927   |
| 0.3005122396791129  | 0.23469232778640952 | 0.5151575737684867  | 0.0892811764098527  | 0.9433515563104062  | 0.3730189898574323  |
| 0.6554843093752906  | 0.7436684396004306  | 0.3865314698573687  | 0.3708274568987672  | 0.4420532967057379  | 0.8715465470651766  |
| 0.7940931885400327  | 0.6402686906430398  | 0.8897277350755852  | 0.8864297011393094  | 0.3618331361509289  | 0.3560820337242885  |
| 0.6574419827450341  | 0.2412612247740293  | 0.2627055737666167  | 0.0709985468268498  | 0.8542049841166074  | 0.5118562568682005  |
| 0.2994832218394525  | 0.7430848539672621  | 0.6143531434469462  | 0.3908029323339340  | 0.5258939837388193  | 0.0183027102168671  |
| 0.1785793834086669  | 0.6363717221504378  | 0.1319755081898916  | 0.4013989854514655  | 0.3571720354226779  | 0.0114045514341734  |
| 0.1712458260285138  | 0.24369769578881204 | 0.1154758107219704  | 0.0646103542529835  | 0.0306521681610960  | 0.5133882167876766  |
| 0.2801770182001760  | 0.1349605530300997  | 0.6407389388265446  | 0.9898297759275988  | 0.5330767534499470  | 0.3732680063743266  |
| 0.6704167130348656  | 0.6396012811539686  | 0.2662728141033920  | 0.5567506512293718  | 0.8467531875338095  | 0.8834776826816157  |
| 0.7945494056764738  | 0.7417647992179032  | 0.7633445302194203  | 0.8656964992336812  | 0.3472686564392143  | 0.165043185249671   |
| 0.7394470558135504  | 0.1509517929289912  | 0.1937043385494697  | 0.1001543562239229  | 0.8428513265225546  | 0.70155431782642016 |
| 0.2215448928759203  | 0.6507389439372021  | 0.687589454378904   | 0.3528219570861265  | 0.5570669270510346  | 0.2012977158030740  |
| 0.2397412839626469  | 0.7475453384879835  | 0.191950932480095   | 0.3750330294836550  | 0.3456189646424521  | 0.2030070260289500  |
| 0.2394135596520065  | 0.1374606263612014  | 0.1647442176337144  | 0.0981701658501776  | 0.3036546029340501  | 0.702974351437722   |
| 0.2303947320317411  | 0.2527317821806399  | 0.6773222745879686  | 0.8579790528527206  | 0.5271635458975181  | 0.1866878528887707  |
| 0.7217858600903266  | 0.754942609030415   | 0.2182575862132712  | 0.60153492279094315 | 0.8588009077910094  | 0.69935791662621    |
| 0.7248428451725657  | 0.634234216316840   | 0.7254172313814637  | 0.7808756262886715  | 0.4389175358045852  | 0.1027592942546138  |
| 0.6839678976004024  | 0.0593232101724213  | 0.5199620272867952  | 0.1688993785932784  | 0.9371203893643119  | 0.7891800760573476  |
| 0.2712223711254649  | 0.5678852929191445  | 0.3514356036571408  | 0.3096327947746980  | 0.4501852746536510  | 0.2970749310360980  |
| 0.1716313965970326  | 0.8178688904698491  | 0.8602956676791071  | 0.2913819194420968  | 0.3222590568394203  | 0.3723187473845224  |
| 0.1845747335052970  | 0.0600993507043737  | 0.84402744668840075 | 0.299467669271197   | 0.3647497872972089  | 0.2610037291128161  |
| 0.6729971426798939  | 0.8189365286225744  | 0.5449645740825065  | 0.3439137741595603  | 0.4142741830257689  | 0.44770843004827633 |
| 0.7747811735646052  | 0.5623367556330258  | 0.0437477889854758  | 0.4170859988363312  | 0.4230104112408294  | 0.3682890567779353  |
| 0.7820574068069973  | 0.1327683723124228  | 0.4522601609297842  | 0.4120047321845722  | 0.4069095640724945  | 0.6231582531180891  |
| 0.1745116972244736  | 0.6440132424905447  | 0.4183217591037648  | 0.3686396870292127  | 0.3390587782475326  | 0.5578025034847380  |
| 0.2743119063969570  | 0.741298883918168   | 0.8967283674551747  | 0.5148700697241682  | 0.3766450686081682  | 0.5409748162258861  |
| 0.2806743076550393  | 0.1401201263485828  | 0.9020374915053889  | 0.5021413389644339  | 0.2516456074538364  | 0.4962888490871656  |
| 0.1840843268473260  | 0.25884180530241317 | 0.43925576294983286 | 0.5063160486361497  | 0.3033126543949696  | 0.3920722048747936  |
| 0.7739209705912158  | 0.7574828790598462  | 0.4577831108078589  | 0.4284272382976244  | 0.27275511061128414 | 0.43332544544420626 |
| 0.6769826793937865  | 0.6352291110412086  | 0.9715645710773899  | 0.4238256354936265  | 0.4969859305806510  | 0.5327236466229582  |
| 0.6759383034454373  | 0.1912000427799105  | 0.5220167471153819  | 0.481314445040481   | 0.5375143887386266  | 0.3731595801432362  |
| 0.2857799056111791  | 0.6982485062411449  | 0.3585437471210655  | 0.4568696842553710  | 0.598232527925282   | 0.4602261267015206  |
| 0.1605190466407031  | 0.6869820093567114  | 0.851449459754213   | 0.4101061322342324  | 0.5857568062545202  | 0.352354851906377   |
| 0.1719037471164904  | 0.1894863204813668  | 0.8256361660041045  | 0.3512802966617815  | 0.532125522767287   | 0.492098185120717   |
| 0.271685908077398   | 0.1937316352200605  | 0.335232047273836   | 0.3835699393398256  | 0.4452104164650419  | 0.4213656972041216  |
| 0.6854588035230422  | 0.6889935110082938  | 0.5576964911864161  | 0.4134713672626291  | 0.3675238476652496  | 0.568537749515090   |
| 0.7753048849082855  | 0.6921795590816230  | 0.0660002108562230  | 0.4698435140090655  | 0.3493604461628991  | 0.5240136124551629  |
| 0.8762799883599464  | 0.0549043282567719  | 0.5221845864296286  | 0.4763513067708354  | 0.2916067003929508  | 0.4569225632177590  |
| 0.0861454362363451  | 0.5597411065624616  | 0.3481448218829208  | 0.396897762819748   | 0.5103605237246142  | 0.4648692576272791  |
| 0.3715144665882660  | 0.8249631525457164  | 0.8537763636842597  | 0.4388342228266023  | 0.5605253689538016  | 0.4089657993634871  |
| 0.3788205632308567  | 0.0597789659241644  | 0.8563754303754644  |                     |                     |                     |
| 0.0867554239073982  | 0.3268553004463324  | 0.3569217248267125  |                     |                     |                     |
| 0.8740541083316985  | 0.8239001409345111  | 0.5292766198905966  |                     |                     |                     |
| 0.5756860954375940  | 0.5642850545238659  | 0.0323586031679324  |                     |                     |                     |
| 0.8972077790738751  | 0.1257527248203069  | 0.3636232095493461  |                     |                     |                     |
| 0.0652780348794669  | 0.6188329029703063  | 0.5170849982309373  |                     |                     |                     |
| 0.3731678858482937  | 0.7596736274840280  | 0.0202576830247164  |                     |                     |                     |
| 0.3807102958420912  | 0.1211384761601473  | 0.0262322106746268  |                     |                     |                     |
| 0.056362003552748   | 0.2512729255129575  | 0.50965653258594    |                     |                     |                     |
| 0.8922364581882553  | 0.74637601086875316 | 0.377838691562463   |                     |                     |                     |
| 0.5669392255422390  | 0.630604573487014   | 0.8676814499142086  |                     |                     |                     |
| 0.8677051189819751  | 0.1345311416126112  | 0.1737471292258012  |                     |                     |                     |
| 0.093532742040079   | 0.631762745900047   | 0.7066262650602313  |                     |                     |                     |
| 0.3591891903881748  | 0.7372265191020257  | 0.2110844512587826  |                     |                     |                     |
| 0.363914177960909   | 0.1451935504820903  | 0.2172397847292013  |                     |                     |                     |
| 0.1008284795840788  | 0.2561035174769207  | 0.6976410433383873  |                     |                     |                     |
| 0.8510221148137752  | 0.7554839335545615  | 0.1928886623325084  |                     |                     |                     |
| 0.5993711798905706  | 0.63114373072768120 | 0.6774425211709880  |                     |                     |                     |
| 0.8952031357216174  | 0.2428939068465621  | 0.2767741473214824  |                     |                     |                     |
| 0.0645175897078780  | 0.7374843312417456  | 0.5981985294356631  |                     |                     |                     |
| 0.4120502159573557  | 0.6453057974414016  | 0.0920198439319177  |                     |                     |                     |
| 0.4045567612715007  | 0.2404003289841072  | 0.0945890919184812  |                     |                     |                     |
| 0.0648014877613011  | 0.1422828192513975  | 0.6165238096479931  |                     |                     |                     |
| 0.8938266465699714  | 0.6412369888560184  | 0.2625976087924666  |                     |                     |                     |

0.0958734389202139 0.2770639672802001 0.3822604848915000 ...

Table with columns of numerical data, likely coordinates or identifiers. Includes a section for '1,4-Dimethylpent-2-ylium ST (MFI)' with sub-sections for 'Si O Al H C' and 'Selective dynamics Direct'.



```
0.1730299416534888 0.0835609880094713 0.8110991188783542 0.2829222037967423 0.3831585279164507 0.2287185245720894
0.6629769865404170 0.8403411008578739 0.5218068272040662 0.5212883009232580 0.410550683874768 0.4999043314249474
0.7661295262067078 0.5846744266855162 0.0189222646266770 0.3340352699472295 0.4916285172215394 0.5024297344778218
0.7695045974680879 0.1494039481445142 0.4205275871589585 0.3585425002406411 0.4972950454057670 0.6262975340368857
0.1664968334864720 0.661833885063466 0.3984813508959776 0.345784460037228 0.4278574442834718 0.5725867695572711
0.2648349617150987 0.7620544070967182 0.8757367920097828 0.43491232693070530 0.56280748471759149 0.458359565996980
0.2667052233377180 0.1650363062765475 0.873686370662727 0.5151163241092291 0.528371825258815 0.4749526820290447
0.1699301469494059 0.2740438600141652 0.4134299143410276 0.4707685435886430 0.5618277499848116 0.5757280669921872
0.762750105752943 0.775800535450856 0.4369385488171439 0.3805165013816513 0.3850551835288454 0.360680826668141
0.6694025639403178 0.6571679957839555 0.9402492004345298 0.5076088393568535 0.4534013068141336 0.2995812693050438
0.6674518868999136 0.22113998109037868 0.4981477907374497 0.5103723598008719 0.3323636484068431 0.3728496439291666
0.2762990107418328 0.71713930447032218 0.3354693257949443 0.4481709878143766 0.3626019934716905 0.5406504932006840
0.1504147085548310 0.7112388277668188 0.8274689214009538 0.4440151573134947 0.4551216967197591 0.2119754507175901
0.1573607880074331 0.2138165842836467 0.7986887142565103 0.4292747683626322 0.4914279116106808 0.325849592842607
0.2582422962366661 0.2095314024374123 0.3097499606723342 0.4883128410257381 0.3150053189786996 0.2527351832512459
0.6731076455366396 0.7104139127253536 0.5397093910754779 0.4392322557123394 0.2819203647757030 0.3514988666354151
0.7635935818845305 0.7141104696780011 0.043444949792295 0.4694792542337977 0.4101288788949343 0.5203224462113591
0.8643506372626759 0.0745605603679684 0.4955130071843575 0.4352795543763824 0.4670608970389942 0.5284867847307558
0.075765055187882 0.578313110881219 0.3283503921703652 0.46607651170106526 0.5329033236841343 0.507541780030589
0.360267617948072 0.8478566211511794 0.832966566837649 0.3646372765601733 0.4677701122968849 0.5589644817805478
0.3619886950135659 0.0815802125115394 0.8247307257284396 0.4281664962333791 0.3858865254534257 0.3243442284162670
0.0749419734056501 0.3450098998543917 0.328759297744524 0.4672116970332681 0.3245865428561953 0.3259594636228370
0.8619464901236589 0.8423775890346903 0.5103135762756952 0.45424111670637111 0.4498691419750371 0.4986991419750371
0.5720862125540129 0.5851171448335143 0.0074683836073625 0.45424111670637111 0.4498691419750371 0.4986991419750371
0.8873564655012359 0.1482360154804808 0.3402289529072141 0.45424111670637111 0.4498691419750371 0.4986991419750371
0.055268867740315 0.6433329148537286 0.4921285148741483 0.45424111670637111 0.4498691419750371 0.4986991419750371
0.3646578215011372 0.7816335956450295 0.9979022404543532 0.45424111670637111 0.4498691419750371 0.4986991419750371
0.3680287012938309 0.1438126152446030 0.9940187929133258 0.45424111670637111 0.4498691419750371 0.4986991419750371
0.0476894074869599 0.2674316371556210 0.4772953970586402 0.45424111670637111 0.4498691419750371 0.4986991419750371
0.8804210760433829 0.789122107520507820 0.3541746615719372 0.45424111670637111 0.4498691419750371 0.4986991419750371
0.5548593064777951 0.6550559379310448 0.8479844000478215 0.45424111670637111 0.4498691419750371 0.4986991419750371
0.8526498529308009 0.1530059281000240 0.1518372645480038 0.45424111670637111 0.4498691419750371 0.4986991419750371
0.0836877140667917 0.6651547189225583 0.6823054944017989 0.45424111670637111 0.4498691419750371 0.4986991419750371
0.3482811790933459 0.7614594378585804 0.1894397818208038 0.45424111670637111 0.4498691419750371 0.4986991419750371
0.3496901644989268 0.1633490024847756 0.1865330221986698 0.45424111670637111 0.4498691419750371 0.4986991419750371
0.0883612405094279 0.2771237423097109 0.6635007001990276 0.45424111670637111 0.4498691419750371 0.4986991419750371
0.8415359095002249 0.7763486892334147 0.1681430942986349 0.45424111670637111 0.4498691419750371 0.4986991419750371
0.589254158309912 0.4692871445783245 0.6588979730760416 0.45424111670637111 0.4498691419750371 0.4986991419750371
0.885446929439046 0.2630616593940174 0.2471753384940663 0.45424111670637111 0.4498691419750371 0.4986991419750371
0.0511875337514179 0.7613510277908661 0.5750019496306612 0.45424111670637111 0.4498691419750371 0.4986991419750371
0.922246506403939 0.664602952021911 0.0709478420333220 0.45424111670637111 0.4498691419750371 0.4986991419750371
0.3882811029491886 0.2620215189570088 0.0695147354740555 0.45424111670637111 0.4498691419750371 0.4986991419750371
0.0521468581373693 0.1614841677022004 0.5920458983601163 0.45424111670637111 0.4498691419750371 0.4986991419750371
0.8835134673030252 0.662515785814381 0.2411820397806081 0.45424111670637111 0.4498691419750371 0.4986991419750371
0.5527614626528656 0.762848534811556 0.7376358654531828 0.45424111670637111 0.4498691419750371 0.4986991419750371
0.7739023556873263 0.084546647982454 0.0383246647377304 0.45424111670637111 0.4498691419750371 0.4986991419750371
0.1643648811729510 0.5893625113304094 0.7856750432991296 0.45424111670637111 0.4498691419750371 0.4986991419750371
0.2759814979726845 0.8484960472561327 0.29207545481237081 0.45424111670637111 0.4498691419750371 0.4986991419750371
0.2679565985919093 0.0816772016044272 0.2772877764605844 0.45424111670637111 0.4498691419750371 0.4986991419750371
0.1614500160870442 0.3457621232960142 0.7825972680056151 0.45424111670637111 0.4498691419750371 0.4986991419750371
0.7631960631204263 0.8454231981925256 0.0552742359387526 0.45424111670637111 0.4498691419750371 0.4986991419750371
0.671216452723709 0.5794653935474761 0.554438344286495 0.45424111670637111 0.4498691419750371 0.4986991419750371
0.4800394037327615 0.3528852438269880 0.1019515372094442 0.45424111670637111 0.4498691419750371 0.4986991419750371
0.4622951004773058 0.855243716526266 0.709679341413036 0.45424111670637111 0.4498691419750371 0.4986991419750371
0.9734943610250605 0.5693492982032370 0.2063013274255259 0.45424111670637111 0.4498691419750371 0.4986991419750371
0.975362376292940 0.3541575295881017 0.201830597605341 0.45424111670637111 0.4498691419750371 0.4986991419750371
0.4631359233338644 0.0692537432983103 0.7009432914567222 0.45424111670637111 0.4498691419750371 0.4986991419750371
0.47125206650771479 0.566579977417299 0.128931175340950 0.45424111670637111 0.4498691419750371 0.4986991419750371
0.9648768591761324 0.8530704153672270 0.6288008433327404 0.45424111670637111 0.4498691419750371 0.4986991419750371
0.5965841663787423 0.3768356827012550 0.1788614879631052 0.45424111670637111 0.4498691419750371 0.4986991419750371
0.3432424958580533 0.8785392116728923 0.6444804488206415 0.45424111670637111 0.4498691419750371 0.4986991419750371
0.0926012596435523 0.5476537112418558 0.1398352493884230 0.45424111670637111 0.4498691419750371 0.4986991419750371
0.0966814279665188 0.3754476061357550 0.1411281790230006 0.45424111670637111 0.4498691419750371 0.4986991419750371
0.3433628169640163 0.0454026882217806 0.6375833290970280 0.45424111670637111 0.4498691419750371 0.4986991419750371
0.5907670173891695 0.5498749810271181 0.1949067471556259 0.45424111670637111 0.4498691419750371 0.4986991419750371
0.8465739181747254 0.8744394106721867 0.6986964778234624 0.45424111670637111 0.4498691419750371 0.4986991419750371
0.5428859507855007 0.4651896409131536 0.0623333950780747 0.45424111670637111 0.4498691419750371 0.4986991419750371
0.3986017580663905 0.9638096824948329 0.7667172916687318 0.45424111670637111 0.4498691419750371 0.4986991419750371
0.0390219909277031 0.4612886539975072 0.26225451131905845 0.45424111670637111 0.4498691419750371 0.4986991419750371
0.655876641926513 0.369665283661047 0.3485920302901171 0.45424111670637111 0.4498691419750371 0.4986991419750371
0.2757391362341902 0.8715925939460943 0.4831012125262193 0.45424111670637111 0.4498691419750371 0.4986991419750371
0.1586657431550714 0.5587236913380504 0.9772200113427346 0.45424111670637111 0.4498691419750371 0.4986991419750371
0.1570872323049594 0.3687544193650374 0.9736910312701446 0.45424111670637111 0.4498691419750371 0.4986991419750371
0.2813348118932104 0.0672951168824888 0.470356542305515 0.45424111670637111 0.4498691419750371 0.4986991419750371
0.6527365727700173 0.5595024594381807 0.3632786841116140 0.45424111670637111 0.4498691419750371 0.4986991419750371
0.781865700946307 0.8624251147470678 0.863881397089479 0.45424111670637111 0.4498691419750371 0.4986991419750371
0.727329568892767 0.592928864250996 0.186495755399126 0.45424111670637111 0.4498691419750371 0.4986991419750371
0.2140562347773607 0.8584033796939646 0.653673206647866 0.45424111670637111 0.4498691419750371 0.4986991419750371
0.2235012446653216 0.5596590806035990 0.1465913202521777 0.45424111670637111 0.4498691419750371 0.4986991419750371
0.2281073044392644 0.3599165828216773 0.1377840611740492 0.45424111670637111 0.4498691419750371 0.4986991419750371
0.2122351401939553 0.0468224473808200 0.6311452023501471 0.45424111670637111 0.4498691419750371 0.4986991419750371
0.7214268926720068 0.5534498024090832 0.1979216764729459 0.45424111670637111 0.4498691419750371 0.4986991419750371
0.7159639762869631 0.871458263445520989 0.695797526501291 0.45424111670637111 0.4498691419750371 0.4986991419750371
0.6864886531480298 0.4607766011961468 0.4810717995412083 0.45424111670637111 0.4498691419750371 0.4986991419750371
0.2491782510150425 0.9650583288293491 0.3541348456616730 0.45424111670637111 0.4498691419750371 0.4986991419750371
0.1894446168547541 0.4643671446834989 0.8486090216701222 0.45424111670637111 0.4498691419750371 0.4986991419750371
0.7728963459983350 0.3654830003660754 0.4353961712291227 0.45424111670637111 0.4498691419750371 0.4986991419750371
0.1636479650608361 0.866438640006564 0.3857483907297714 0.45424111670637111 0.4498691419750371 0.4986991419750371
0.2732037525816217 0.5632525142613590 0.8864561623993122 0.45424111670637111 0.4498691419750371 0.4986991419750371
0.2718628016334928 0.364476408069373 0.8803025183394962 0.45424111670637111 0.4498691419750371 0.4986991419750371
0.1629633285780363 0.060129059189819 0.39107249399819 0.45424111670637111 0.4498691419750371 0.4986991419750371
0.7729825946320075 0.5662102760352480 0.4370460700514920 0.45424111670637111 0.4498691419750371 0.4986991419750371
0.6623934479457424 0.8694089142361226 0.9354093087989228 0.45424111670637111 0.4498691419750371 0.4986991419750371
0.8587515075924780 0.460609973244214 0.48033569120114761 0.45424111670637111 0.4498691419750371 0.4986991419750371
0.0783143071363984 0.963058054768407 0.349232627794234 0.45424111670637111 0.4498691419750371 0.4986991419750371
0.3562887119013667 0.4641722641477291 0.84875284125566108 0.45424111670637111 0.4498691419750371 0.4986991419750371
0.881817866057533 0.3812155856157448 0.3305986115809145 0.45424111670637111 0.4498691419750371 0.4986991419750371
0.0563941781897527 0.8802002522376906 0.4949914851274335 0.45424111670637111 0.4498691419750371 0.4986991419750371
0.3773958344760926 0.5440313532705825 0.9995731020474807 0.45424111670637111 0.4498691419750371 0.4986991419750371
0.3762824216751237 0.380957308585562 0.9995731020474807 0.45424111670637111 0.4498691419750371 0.4986991419750371
0.0499971736366694 0.0513439739892627 0.4864076233004745 0.45424111670637111 0.4498691419750371 0.4986991419750371
0.8884169544163630 0.553899811596310 0.3498149236009332 0.45424111670637111 0.4498691419750371 0.4986991419750371
0.5446749557927795 0.8669028440109981 0.8565431732890980 0.45424111670637111 0.4498691419750371 0.4986991419750371
0.8532234280475890 0.3685354635070652 0.141336418013481 0.45424111670637111 0.4498691419750371 0.4986991419750371
0.086965679298783 0.8651658619664664 0.6835561811106224 0.45424111670637111 0.4498691419750371 0.4986991419750371
0.3494282456815637 0.5695950600129879 0.188386748479114 0.45424111670637111 0.4498691419750371 0.4986991419750371
0.3656535404779936 0.3647934980117471 0.1896453751216673 0.45424111670637111 0.4498691419750371 0.4986991419750371
0.0854767188793733 0.0482914141139524 0.6748872805171068 0.45424111670637111 0.4498691419750371 0.498699141975037
```

0.6931624875895720 0.688454325225535 0.3208434932941947 ... 0.6243083605196608 0.1047845454076605 0.8536149629796139

|                     |                     |                     |                     |                    |                    |
|---------------------|---------------------|---------------------|---------------------|--------------------|--------------------|
| 0.2504963174163387  | 0.7470049250700806  | 0.9978933858926905  | 0.1137478302060290  | 0.4151305631283924 | 0.0217488223331513 |
| 0.7527577255284741  | 0.2513037443348421  | 0.9898526110165170  | 0.2528872538754906  | 0.3794957634608039 | 0.0084986673611476 |
| 0.2492353258731360  | 0.2500376941441928  | 0.3251617362775143  | 0.7453315378214800  | 0.3796577143524902 | 0.0046477132297546 |
| 0.7477653021540358  | 0.7478575065628803  | 0.6634295527982499  | 0.8853232483778635  | 0.4120662108897145 | 0.0193992524113934 |
| 0.7450024901448479  | 0.7569733580140809  | 0.5097276527008851  | 0.6177654510348699  | 0.6956358813916623 | 0.0245349372697272 |
| 0.2463888755084880  | 0.2511431272775892  | 0.8395966890721270  | 0.3816146631290106  | 0.6984547898475867 | 0.0242536782130900 |
| 0.7480394336557158  | 0.2519576706138773  | 0.839910665548465   | 0.1242259659868641  | 0.1872271895552126 | 0.0255738020318451 |
| 0.2535208223048271  | 0.7562246458332321  | 0.5115050859256702  | 0.8767798002732478  | 0.1914196809983992 | 0.0198952642191613 |
| 0.2499310032808652  | 0.7476310371932020  | 0.6638232252100275  | 0.5879910537761804  | 0.2796160927576957 | 0.584071161684288  |
| 0.7535673333546847  | 0.2529295260850128  | 0.3193562733430230  | 0.5901031576853603  | 0.4430410996996983 | 0.3720411094221357 |
| 0.7486434010079549  | 0.7489721368776581  | 0.3309197928170577  | 0.5062858341698214  | 0.4146274089683382 | 0.3428798345205112 |
| 0.2434970436387521  | 0.2526662292317050  | 0.6622666859435190  | 0.5296436702444277  | 0.3641649422464658 | 0.4398839740789119 |
| 0.2434051074254651  | 0.2541170647366265  | 0.5017205737276917  | 0.4496915323288828  | 0.4127931840276842 | 0.4644480222593138 |
| 0.7443257901026918  | 0.7564288954198980  | 0.8433383803144305  | 0.6084030357969074  | 0.4484630333841133 | 0.4816189191783986 |
| 0.2532602142479505  | 0.7544443264487910  | 0.8432763492410090  | 0.5216776428099785  | 0.4994737389973900 | 0.5540341492985814 |
| 0.7535673225050477  | 0.2583731126355682  | 0.5034882566133589  | 0.5611249082020007  | 0.4283054499643783 | 0.5516243423484956 |
| 0.7527707687523929  | 0.2546229806552563  | 0.6638990831307601  | 0.46663724980658729 | 0.4266660828811046 | 0.5846611827068088 |
| 0.2515792305796772  | 0.7474222955154863  | 0.3312413464171350  | 0.5278798868125700  | 0.5451050746317820 | 0.4082441144869182 |
| 0.3734489779279079  | 0.3146332096525457  | 0.3053482506696923  | 0.5810274168389656  | 0.5466645705760809 | 0.3048798041784049 |
| 0.6176377583165906  | 0.697533943879314   | 0.6908231374529497  | 0.5017769050547297  | 0.5965427692695964 | 0.3102199317717761 |
| 0.6277224941625290  | 0.6901576561598020  | 0.4735733975616510  | 0.4959542017752540  | 0.5187407780927027 | 0.2762627103615440 |
| 0.3803588071943403  | 0.2978231238361195  | 0.85631111079527090 | 0.4434826045908851  | 0.5173350513843412 | 0.3798053123834177 |
| 0.6163325887660319  | 0.30200192520014364 | 0.8568378439604346  | 0.5302266217057083  | 0.4451922000769808 | 0.377775396527523  |
| 0.373078388784374   | 0.6923178649600509  | 0.4757885410176458  | 0.5090809462050891  | 0.4162432811540494 | 0.4381032957079673 |
| 0.3810747295093577  | 0.698530510263499   | 0.6912072409282809  | 0.5500481179583758  | 0.4374699142895335 | 0.4885881024303250 |
| 0.6260694266559059  | 0.313020245034879   | 0.3030241482167035  | 0.5220664665637627  | 0.4454662246428208 | 0.5478254146300739 |
| 0.8801259743298351  | 0.7995076671784045  | 0.3119886374760612  | 0.5031905813209905  | 0.5157712834854561 | 0.3724112783289384 |
| 0.1220446986458883  | 0.1887434437446602  | 0.6909959786181580  | 0.1225115117196190  | 0.5460863169390199 | 0.3126000999869257 |
| 0.1205366607308804  | 0.1928482571033825  | 0.4732556828315181  | 0.8712914634167638  | 0.8613021858352076 | 0.8623074311407836 |
| 0.1282999359306755  | 0.8166495170109842  | 0.8623074311407836  | 0.8753636943077655  | 0.4743609696204888 | 0.4743609696204888 |
| 0.8753636943077655  | 0.1961249270796498  | 0.8623074311407836  | 0.8731572788696559  | 0.6909959786181580 | 0.6909959786181580 |
| 0.8731572788696559  | 0.1888939754500600  | 0.6903463405964554  | 0.1199385577276975  | 0.6903463405964554 | 0.6903463405964554 |
| 0.1199385577276975  | 0.7984072617241639  | 0.3124407362696855  | 0.3676240053778489  | 0.6393728697773701 | 0.6393728697773701 |
| 0.3676240053778489  | 0.3156613070820197  | 0.6393728697773701  | 0.6170858413965853  | 0.3564298711333351 | 0.3564298711333351 |
| 0.6170858413965853  | 0.7005068740200995  | 0.8082550894168575  | 0.6272847570580200  | 0.8082550894168575 | 0.8082550894168575 |
| 0.6272847570580200  | 0.6892195155991100  | 0.5228626314982050  | 0.3754774367559611  | 0.5228626314982050 | 0.5228626314982050 |
| 0.3754774367559611  | 0.3058632134174438  | 0.5148237699991185  | 0.6177014599493376  | 0.8007001669592247 | 0.8007001669592247 |
| 0.6177014599493376  | 0.3097513500048734  | 0.5148237699991185  | 0.3727145255289891  | 0.3581213819085561 | 0.3581213819085561 |
| 0.3727145255289891  | 0.6897359416858952  | 0.3581213819085561  | 0.3816789378001181  | 0.696490587795686  | 0.696490587795686  |
| 0.3816789378001181  | 0.696490587795686   | 0.3581213819085561  | 0.632054552902762   | 0.3294315404123868 | 0.3294315404123868 |
| 0.632054552902762   | 0.764891376114975   | 0.6456895806686314  | 0.8803441336515433  | 0.6456895806686314 | 0.6456895806686314 |
| 0.8803441336515433  | 0.192725722291534   | 0.3552486371397027  | 0.1206283787850248  | 0.3552486371397027 | 0.3552486371397027 |
| 0.1206283787850248  | 0.1982449949516557  | 0.8076839899661013  | 0.1193692952872656  | 0.8076839899661013 | 0.8076839899661013 |
| 0.1193692952872656  | 0.8182409862290951  | 0.5291214043578839  | 0.8709150085742436  | 0.5291214043578839 | 0.5291214043578839 |
| 0.8709150085742436  | 0.8179041945030204  | 0.5287293848522778  | 0.1276793924060404  | 0.5287293848522778 | 0.5287293848522778 |
| 0.1276793924060404  | 0.2025041808488122  | 0.8078321586422644  | 0.8756927498099552  | 0.8078321586422644 | 0.8078321586422644 |
| 0.8756927498099552  | 0.1936381400981012  | 0.3563568724502885  | 0.8751447755253624  | 0.3563568724502885 | 0.3563568724502885 |
| 0.8751447755253624  | 0.8001106566097164  | 0.6458073301271968  | 0.1189755715157241  | 0.6458073301271968 | 0.6458073301271968 |
| 0.1189755715157241  | 0.3138379079668701  | 0.973009500595457   | 0.3691764532460205  | 0.1421531251323063 | 0.1421531251323063 |
| 0.3691764532460205  | 0.690543881510167   | 0.1876755026541484  | 0.6272499268897801  | 0.1876755026541484 | 0.1876755026541484 |
| 0.6272499268897801  | 0.3016142483638991  | 0.1876755026541484  | 0.3782033764762099  | 0.3016142483638991 | 0.3016142483638991 |
| 0.3782033764762099  | 0.2989344043318745  | 0.1858881044745310  | 0.62031439585810221 | 0.1858881044745310 | 0.1858881044745310 |
| 0.62031439585810221 | 0.6876680961313053  | 0.1412379483676886  | 0.3713004441802210  | 0.1412379483676886 | 0.1412379483676886 |
| 0.3713004441802210  | 0.3141318600686940  | 0.9740762592901092  | 0.6269007937554901  | 0.9740762592901092 | 0.9740762592901092 |
| 0.6269007937554901  | 0.7917873656698132  | 0.9779404939998132  | 0.8793857475431056  | 0.9779404939998132 | 0.9779404939998132 |
| 0.8793857475431056  | 0.196999755981973   | 0.1430789453304996  | 0.118528852008701   | 0.1430789453304996 | 0.1430789453304996 |
| 0.118528852008701   | 0.817162353906472   | 0.1949062104977408  | 0.8725835774972347  | 0.1949062104977408 | 0.1949062104977408 |
| 0.8725835774972347  | 0.8154769253563758  | 0.1954362269796612  | 0.1278956184742224  | 0.1954362269796612 | 0.1954362269796612 |
| 0.1278956184742224  | 0.1912597688422199  | 0.1377690463783124  | 0.8763244271573701  | 0.1377690463783124 | 0.1377690463783124 |
| 0.8763244271573701  | 0.797036305414968   | 0.9788708203577302  | 0.1184967839557257  | 0.9788708203577302 | 0.9788708203577302 |
| 0.1184967839557257  | 0.393217588711406   | 0.0893526458033949  | 0.9986810131189748  | 0.0893526458033949 | 0.0893526458033949 |
| 0.9986810131189748  | 0.60362502811731402 | 0.9240601664206848  | 0.0001226032587505  | 0.9240601664206848 | 0.9240601664206848 |
| 0.0001226032587505  | 0.6042908697177078  | 0.2598287125205438  | 0.9985360249926660  | 0.2598287125205438 | 0.2598287125205438 |
| 0.9985360249926660  | 0.8974454232996683  | 0.0780881146923447  | 0.4993236668306056  | 0.0780881146923447 | 0.0780881146923447 |
| 0.4993236668306056  | 0.8974454232996683  | 0.0780881146923447  | 0.499731316307223   | 0.0780881146923447 | 0.0780881146923447 |
| 0.499731316307223   | 0.0998375562219813  | 0.2504839962583034  | 0.4964230887739504  | 0.2504839962583034 | 0.2504839962583034 |
| 0.4964230887739504  | 0.398302863514561   | 0.4198943022442868  | 0.998335263850882   | 0.4198943022442868 | 0.4198943022442868 |
| 0.998335263850882   | 0.6043402615041304  | 0.5918865399598929  | 0.0002401531102459  | 0.5918865399598929 | 0.5918865399598929 |
| 0.0002401531102459  | 0.3991312540970679  | 0.756958637216958   | -0.0003453603795995 | 0.756958637216958  | 0.756958637216958  |
| -0.0003453603795995 | 0.8939297841848178  | 0.4113894696037958  | 0.499782932189723   | 0.4113894696037958 | 0.4113894696037958 |
| 0.499782932189723   | 0.1124682975537874  | 0.5840211895388006  | 0.4900787594527633  | 0.5840211895388006 | 0.5840211895388006 |
| 0.4900787594527633  | 0.8970605872669090  | 0.7439696147158202  | 0.5002060509171929  | 0.7439696147158202 | 0.7439696147158202 |
| 0.5002060509171929  | 0.3015806092472743  | 0.0756924739989132  | 0.1015390804027674  | 0.0756924739989132 | 0.0756924739989132 |
| 0.1015390804027674  | 0.7004804579956851  | 0.9020026649843894  | 0.9048085566502700  | 0.9020026649843894 | 0.9020026649843894 |
| 0.9048085566502700  | 0.7012540749952327  | 0.2373438115897897  | 0.8958993619342911  | 0.2373438115897897 | 0.2373438115897897 |
| 0.8958993619342911  | 0.3012148734879853  | 0.0787252471489327  | 0.0942304438877458  | 0.0787252471489327 | 0.0787252471489327 |
| 0.0942304438877458  | 0.7000240380953431  | 0.2386466273798796  | 0.0935191422462310  | 0.2386466273798796 | 0.2386466273798796 |
| 0.0935191422462310  | 0.7007739920130216  | 0.9022115405873020  | 0.5979316868942659  | 0.9022115405873020 | 0.9022115405873020 |
| 0.5979316868942659  | 0.80221108978529089 | 0.0888735965464202  | 0.4049145135708140  | 0.0888735965464202 | 0.0888735965464202 |
| 0.4049145135708140  | 0.1987065059071270  | 0.9301890692829347  | 0.4049949715260959  | 0.9301890692829347 | 0.9301890692829347 |
| 0.4049949715260959  | 0.2005574454605404  | 0.2585542610638089  | 0.4014438795398190  | 0.2585542610638089 | 0.2585542610638089 |
| 0.4014438795398190  | 0.1987862527323504  | 0.0933567786844479  | 0.5909810623483823  | 0.0933567786844479 | 0.0933567786844479 |
| 0.5909810623483823  | 0.200688944607961   | 0.9282238934246959  | 0.5934569500523845  | 0.9282238934246959 | 0.9282238934246959 |
| 0.5934569500523845  | 0.3044684770720776  | 0.4175253752107127  | 0.1000099685016412  | 0.4175253752107127 | 0.4175253752107127 |
| 0.1000099685016412  | 0.7021592036625286  | 0.5680677466707210  | 0.9082630909229018  | 0.5680677466707210 | 0.5680677466707210 |
| 0.9082630909229018  | 0.3022980856297153  | 0.7407163468922605  | 0.0957961502208605  | 0.7407163468922605 | 0.7407163468922605 |
| 0.0957961502208605  | 0.3036386493350276  | 0.777992057485938   | 0                   |                    |                    |

0.7998255520542853 0.81237354531761631 0.8196020667355091 0.8200296284378450 0.4097028666485376 0.5818723572543116

0.2001250793628479 0.8121377378132447 0.8199610399935052 0.1671657276300765 0.5730228450312627 0.4168110545284512

0.7997736819008600 0.1902358827281558 0.5134792190818245 0.3757495910623841 0.0824326293911978 0.6337734518179750

0.7994054899371363 0.18750097848137240 0.6507272416914754 0.6286515735711027 0.9043722578114045 0.309100075422779793

0.1948473778796937 0.8040769651479323 0.3489716703026850 0.61780092106155485 0.9155854517828635 0.4771293107712730

0.2976115092283707 0.3106547259193783 0.6815210729779851 0.3729163471593273 0.1041551858551528 0.8555294595885948

0.6931415130080396 0.6862414479282578 0.3207527419096458 0.6273152494111524 0.1046256446698986 0.8552031818212391

0.6999690149709136 0.687205496711145025 0.8501779095740886 0.3824672481393843 0.9155665669581156 0.4773006532858247

0.3037000410324659 0.3080300661587932 0.4840440390038005 0.3715195143240914 0.9040999451708384 0.6918446319036813

0.6948855338439814 0.3108572615163588 0.480896895007598 0.6228295549544275 0.0817923383485074 0.3032888228764744

0.3003818284137389 0.6869412678824951 0.8501373766812060 0.8690766035528090 0.6038503571120723 0.3081968570514405

0.3069708766921487 0.6859364105039709 0.3209368465154764 0.1150445596340266 0.4150178877870933 0.6874217128686536

0.7003973831661021 0.313869916906184 0.6823355784486391 0.1298443773728362 0.4082613085854919 0.4721999774027952

0.8053635354606314 0.8045876904361979 0.6822071098918726 0.8831514262895771 0.5819126031563520 0.8581390090910716

0.1964109356894907 0.1858454349303830 0.3170582960957011 0.117796825844516 0.5816776190995211 0.8590618415502269

0.1939211655853262 0.1875444582798316 0.8456577820212692 0.8750572874455000 0.4098827135987311 0.4741967241008627

0.8006140722578176 0.8121785169244281 0.4859360281090990 0.8881955796124094 0.4107573420669474 0.6858246220631441

0.2003655524518559 0.8126201829500385 0.486137693603212 0.1295342941116313 0.6033053163574059 0.3086923180875282

0.8038072417030102 0.1882603586121060 0.8445838145335119 0.3788144272360008 0.0780529667318693 0.638540131272587

0.803998084432034 0.1854511932818999 0.3144570469889545 0.6286665363864170 0.9041331438505302 0.3593619048483882

0.1945821354220068 0.8043842160505543 0.6829643780506747 0.6174375957352823 0.9161034565453643 0.8089529420375577

0.0857615216007318 0.3785084966515857 0.0808287232021037 0.3806713417478753 0.095874303609269 0.5213493144712933

0.914973612354395 0.622089087102187 0.914451542687450 0.6162857268755947 0.0893359270251996 0.5200210745568294

0.9142970181772440 0.62149297326734407 0.248698267587750 0.3833247159278855 0.9158362190291780 0.8097424410260707

0.9137198261236107 0.3784531377239690 0.0802308457166058 0.3714007227263601 0.9039268749229651 0.359551181815658

0.0848388782980415 0.62177131035104227 0.249068194464264 0.6202398629126343 0.0764717354336404 0.637317063342707

0.0855864073393765 0.6221225507404299 0.9151075855952543 0.8690965125576571 0.6057352513550182 0.641039974314678

0.585989160997171 0.8778783478206711 0.0842246114595483 0.11634410933750599 0.4123562077060493 0.3543974739169296

0.4147940249906856 0.1215618852372734 0.9167506374486569 0.1313237391709529 0.4025095885634181 0.8046383637917910

0.4139392429711318 0.1214855059694818 0.2496510187286411 0.8858297764350140 0.5838643074343101 0.5247885924419093

0.4137881134433991 0.8786109662739962 0.0850947126116042 0.1163671223365091 0.5828690828715559 0.5253914766086919

0.5845832275448083 0.1212182568772698 0.2494982206930678 0.6868637851207114 0.403591583279340 0.802936490855610

0.5856242595505055 0.1222463498913875 0.9162765162316885 0.8838537250256414 0.4148044380899413 0.3556846803948630

0.0870109199509303 0.3790320180190626 0.415258486095710 0.1314307061313038 0.6053515030349110 0.6413231801903824

0.9160270851687389 0.62348676055052276 0.5820736374502230 0.3813975471231464 0.0800170886111452 0.9716501293399057

0.0858216497111698 0.3786457254480354 0.7470306227551928 0.6171912393537862 0.9143008181501750 0.143443248361236

0.9151102556896707 0.379655242180090 0.7457454235990747 0.3753704908268923 0.1034606394508853 0.1872083791104129

0.086185078393459 0.6230748515376111 0.5821505830126853 0.6229875089150498 0.10330212324032326 0.1869174302761260

0.9143558563252492 0.3803823217080596 0.4157187341312279 0.3628579734239720 0.9153198103347242 0.1438158331400348

0.58622560670911215 0.8797354605902987 0.4181627560078177 0.6195201530206443 0.0814119791525647 0.9713290813213450

0.41278618793699 0.1208174844195917 0.5845140368974644 0.87115015613552211 0.6039413462146306 0.9745314961219225

0.5863670075040717 0.8800356984804905 0.7500132260839375 0.1296855560022666 0.4049178289701680 0.138301377727570

0.4142380578463676 0.879779734052135686 0.7506732710667561 0.8835488788227285 0.5811721198660211 0.1922694591838868

0.5881899315783727 0.1203303785352176 0.5827067486368380 0.1156315955018607 0.5811219230361271 0.1925791907319041

0.4141058679932121 0.8796265544139207 0.4184646218946302 0.8690024484089768 0.4049761816260990 0.1372134037042392

0.0863888582743104 0.2228118596572776 0.0795664137952825 0.1290296834468118 0.6038660719194328 0.9753746262354613

0.9143137650083248 0.777308090275457 0.9139248801176456 0.2415053759704520 0.1211426466475201 0.3357620808263769

0.9145115939723829 0.7769882250052982 0.2469656404490818 0.7684704968895022 0.8745335271802307 0.6678902834509877

0.9138367504782811 0.222653546831433 0.0781213034797137 0.7575426044794155 0.8809710196926207 0.4878634616754844

0.0856119471179376 0.7768105413613008 0.2474657994715356 0.2339554122983283 0.1214818593564326 0.8229832831715350

0.0855742982472352 0.7717169915257701 0.9145371835945580 0.765197552193444 0.1224194921177735 0.8197780721515439

0.5858943679840817 0.7226467321235853 0.0866343950961833 0.2426015270265919 0.8819766058673513 0.4881816404880208

0.4139480631798149 0.2767169213318028 0.9200400947020995 0.2316345399792576 0.8742878169366899 0.668434247174774

0.4143872502592422 0.2771124074991583 0.2512506321697940 0.7571980702426703 0.1215435441301383 0.3334498810934665

0.5850804093524703 0.7264945112244015 0.0870300268747733 0.7307692590342626 0.6194093483550390 0.344225317373227

0.5848874271310874 0.2767490297795045 0.2503606428989393 0.25478714888570204 0.3799925528046875 0.6775593227037015

0.085021215892304 0.2776284281102110 0.9200479116662480 0.2709733111133420 0.3807446738470076 0.4957410994344824

0.9153576993190951 0.7785626539774597 0.5808810837326704 0.7489161574962606 0.6243667572640408 0.832958962600706

0.0847162387801866 0.2226301839514897 0.745725635262101 0.2520545795048968 0.6236097431222178 0.831228268542677

0.9134140787238515 0.223761076513090 0.7450247507385542 0.7325056537746713 0.3819649698772030 0.4895098437522078

0.0855838705131815 0.7781835680839768 0.5808681532114499 0.7492041513837276 0.3809196109069836 0.6824834924212687

0.9115431919493341 0.2244892878996593 0.4143763767417435 0.2685002265892312 0.61877775519582 0.3430099362099247

0.5860501169982949 0.723552898339435 0.4199186153067432 0.2452217265083128 0.1217582785330588 0.6660712453240555

0.40942667388004 0.2728240200307598 0.5857433163649113 0.7684788436327935 0.8746145775785235 0.335108095246583

0.5862423770670961 0.7239505255511257 0.7534052799684819 0.7569876021997095 0.8815681807441609 0.8224110746798000

0.4144291359064682 0.7237991193287507 0.7537045480467607 0.2423724253966676 0.1257886611744332 0.4918528936342888

0.4143231692688525 0.7233826319164934 0.4206791788119776 0.7541515258371022 0.1265518562702239 0.4928398260385748

0.2756706837168372 0.9959464515240777 0.9978136418083472 0.2438091100459344 0.8809282844876816 0.8225272730595978

0.7245116530565047 0.9965168370271744 0.9970814628494432 0.2317290174277115 0.8742645650864553 0.3345981279305515

0.7157452575054348 0.0035322913328288 0.1740041563263505 0.7526921050402290 0.1228005706790161 0.6643424064754508

0.2828456277034886 0.0038337115443239 0.1733081086426786 0.7309681093948764 0.6188301062777102 0.675500555880211

0.7837217332589322 0.5017637429200772 0.9929461514332594 0.2560216970124132 0.3789437686875203 0.3410006636030258

0.2167029536188294 0.5017834808736273 0.99390215736091534 0.2707762576366934 0.3769814853369194 0.8033748560999122

0.2236242761588548 0.4987911459592312 0.1677536287160067 0.7503255886653841 0.6254777253635248 0.5115475736834350

0.7549734103292443 0.4987911459592312 0.1677536287160067 0.2505550724872091 0.6260780572258253 0.500266533128933

0.2739071218698427 0.9606924980102261 0.3244439753760220 0.729781278287372 0.377565670204983 0.83409127979318307

0.727693845754309 0.963773096115721 0.6665568358703932 0.7451964016649557 0.37897936549461 0.337962959591831

0.7218939604836302 0.002704764644089 0.5028107854803785 0.2695745538588222 0.6188525932785159 0.677388266257604

0.282766695378357 0.0029578225471131 0.8406664033333253 0.2468260790205171 0.1215030182471445 0.9975678794026362

0.717590106587151 0.0037194679294198 0.8399382654265310 0.7577060480593725 0.8823378609280123 0.156103264442152

0.2804457317109753 0.0034961610646419 0.5052441324303754 0.2361720854961083 0.1231720585496924 0.1557098609076988

0.2729233156057073 0.9958527169064819 0.6665547278875122 0.7621395758416369 0.1225855608526158 0.1549619026627356

0.725924789604170 0.9961629044350614 0.3307489032127440 0.24280852667989590 0.8820430886744390 0.1565434311264215

0.7814974313595446 0.5016905921743504 0.3276732251406292 0.75381424999674505 0.1220600101706904 0.0004383719846564

0.2175038228856758 0.5020162260828887 0.6596560679360785 0.7328487751657902 0.619495511810592 0.010699637175930

0.2249728743197804 0.5003455301539462 0.5029989803183683 0.2699249278355078 0.3783610086727768 0.1643457857514395

0.7763920952550628 0.4981981935842890 0.8330967894210038 0.7504274973954150 0.6256104365775594 0.1662582484551016

0.2239136927908983 0.4976483916192246 0.8334903493703707 0.2493776637931125 0.6250971669233296 0.16818050165517818

0.7777045241187489 0.500690785796152 0.503966005625682 0.7302998322873625 0.3777438974749218 0.1678074416305132

0.7837802344735129 0.5024155605438616 0.6579155812431491 0.2676257082689312 0.6196108774175126 0.0102928804275247

0.2173168295824246 0.501121624083068 0.327048980920941 0.3204881552060646 0.29990712740963090 0.0814532182179797

0.3330519051328162 0.0721897713999689 0.0809089169654112 0.6726337486496838 0.6805962457834267 0.9180677334327164

0.6750018001970202 0.9122314371401392 0.9160895984085892 0.627967723493929510 0.68078417750044263 0.2512552407141490

0.6758864472378261 0.9113897626972485 0.2503303499215971 0.3285667175762323 0.377539994731596 0.081719473638862

0.6653264450703944 0.070510469693349 0.0809937104840046 0.3272821565543753 0.6809710577860219 0.9181831432097373

0.3241946769271191 0.9130916813357434 0.2505892329575347 0.8249351650989230 0.7996438255490489 0.0849120242472589

0.3247949484069377 0.9113698015852806 0.9168203852631701 0.1706637859415476 0.1810345186609471 0.9145507812874116

0.8347757278006722 0.5733669581951775 0.0828749074229185 0.1723217382450984 0.1800683192403942 0.2483472272711822

0.1739170654494790 0.413785198157727 0.9147398408605082 0.1750745627290604 0.7992856580804961 0.0856834155813623

0.1746333598443397 0.4131305424541878 0.2478010765317087 0.8300752511157400 0.1777589027350893 0.2464767475980264

0.1659360169219109 0.5738682389971183 0.0836160252616991 0.82624043824849298 0.1790293945936817 0.9134165516367621

0.8289706476394995 0.4163867712465090 0.2475706488420207 0.3250752626189569 0.3001431668604363 0.4146178747468168

0.8284218017501527 0.414586539460330 0.9135434240901807 0.6710538157117945 0.6816596907529639 0.5844223550031447

0.3339646355761676 0.0723422780330057 0.414548851012598 0.3251704413827688 0.2999869745147174 0.7491007693510005

0.6786980687797414 0.9144276402727229 0.5828489791680765 0.672514014577623 0.302029534490239 0.7501090361956936

0.3324

0.2460567268475498 0.251175825755726 0.9916726165937406 0.4952038165993496 0.2867099410925239 0.5879559520115346

0.7470831947275370 0.7476151850418046 0.9979660963904057 0.5003680867280517 0.7052418110899603 0.7571878567199751

0.7459367887718573 0.7549986232537884 0.1755845925470952 0.6281085649012016 0.9041543614304565 0.0254466960759256

0.2461335915989738 0.2514440479613484 0.1716415266252724 0.7678925311147173 0.8751433749535251 0.005236587750487

0.7544039992465945 0.2507718672389978 0.1718191547731772 0.230908530622657 0.8750236598800703 0.0069747333534210

0.2546637187842989 0.7545939961613510 0.1758635585685959 0.3710572361667718 0.80275603035860741 0.0261753847310463

0.2518851568308198 0.7475395521549290 0.9978744107284593 0.1139393841125903 0.4147653406189321 0.0209406078255711

0.7536081997779548 0.2512485133455905 0.9909400496113263 0.2533070659102546 0.3792151780532497 0.0092411555468878

0.2469171366553575 0.2503229612474049 0.3261691459051739 0.7464332474644297 0.3794193861440856 0.0065837600519454

0.7490400228184846 0.7467447005144503 0.6638596980223538 0.8860049093542152 0.4143358939389641 0.0201343115637173

0.7466788927782216 0.754527381397271 0.5091558884033560 0.6175510984154841 0.6957398677738559 0.020486925249991

0.2481295427227720 0.2496031578465942 0.8379070105070565 0.3821055734805643 0.6971558705756374 0.0204133614222953

0.7486931100285126 0.249782046990759 0.8387867228850704 0.1269687306142249 0.1863536987090055 0.0250384412883835

0.2546949876425346 0.7552762187106845 0.5093595462213337 0.8748914061533233 0.1877784473786236 0.0220136413365441

0.2514206394031865 0.7466470282621886 0.6657252963368214 0.5892725774919407 0.2753773355997486 0.5847155789946447

0.7531581589548103 0.2506178927313738 0.3200150162511571 0.5140958768429085 0.3639099960680070 0.5351144167920915

0.7483723375193132 0.74708716402819562 0.331116579724780 0.5970392800462362 0.4211096699899946 0.5443764669042881

0.243464680643043 0.2518443413994686 0.66221078317503135 0.4114479156894701 0.4630535502709668 0.5448040989007009

0.2422865194985561 0.2549050403952128 0.5027915208448841 0.4441628182290236 0.4167619840740458 0.6103321530839963

0.7468298459223470 0.7540055910624635 0.8426647565163965 0.5118448348239695 0.5418525407660595 0.5574993275203250

0.2529935819218747 0.7532389364041757 0.8419249264133664 0.5508249018081629 0.5375186542165152 0.6682633948023397

0.7503274233608154 0.2554015571202435 0.50508876630914512 0.6179807608188828 0.540402189992025 0.6217281858444311

0.7538969087167780 0.2533542185659347 0.6561164180721144 0.55798770329624034 0.4510603241856173 0.6616110284223366

0.2516279641959001 0.7466320027809880 0.3310886674334766 0.4863420582552423 0.438459541860444 0.480758162611602

0.3718757238310957 0.3136235982217928 0.3050764858694264 0.5895188962710736 0.5243584391108015 0.4579090877421362

0.617937945550836 0.6974071199512497 0.6907056655246260 0.581343031958369 0.490763695392951 0.3858915774405556

0.6288509825304458 0.6876356181633011 0.473848229765591 0.6531804649680283 0.4643166420103317 0.434481594404608

0.3816102612342713 0.296896710048193 0.8555327159341618 0.550680188310380 0.3809295080057479 0.42744885789265

0.6171278266531375 0.3000619720504313 0.8567514302042467 0.552935215265556 0.4037096620470989 0.5161960708325942

0.3728251505102810 0.6882833477789806 0.4756248703863672 0.45235961161103636 0.4571486621125994 0.5795466107493732

0.3827904093924730 0.6973344796807247 0.690175715891432 0.5075434189983907 0.5002707362295474 0.5876115506970256

0.6281198043575267 0.3145544918401753 0.3031849833159979 0.5613409002195318 0.4971949753882873 0.6372182730900188

0.8804124403009116 0.7963566628930276 0.3110457730977144 0.5445658146410529 0.4256813574355898 0.4545457640034530

0.1239905527626360 0.18590047554407780 0.6906457755475269 0.5956056056723093 0.4792756581873069 0.4321793113021830

0.1204216473667580 0.1924240392069242 0.4741226200010276 0.8721379316127326 0.8613396549334769 0.8625274462338762

0.1286036562434320 0.8161907939191795 0.8613396549334769 0.8738528702010662 0.195507699903214097 0.4737420689348517

0.8736261196394272 0.1868130456080899 0.6905323257799321 0.179497881808975 0.795984396507545 0.311179822511927

0.3661489897745366 0.795984396507545 0.6905323257799321 0.311179822511927 0.311179822511927 0.311179822511927

0.6172850543421481 0.69786867159074004 0.3567635910364697 0.003657035758371 0.000000000000000 22.62600000000000190

0.6282004303148706 0.6889365192533808 0.8080114059989407 0.6172850543421481 0.69786867159074004 0.3567635910364697

0.3781574636927299 0.2987998033599644 0.5219111322269551 0.6171343000032202 0.310945409899700 0.5155489773919711

0.3724569775658128 0.686828799897559 0.8082834668359847 0.3724569775658128 0.686828799897559 0.8082834668359847

0.3819737135872361 0.6968521815294442 0.3581862363887207 0.3819737135872361 0.6968521815294442 0.3581862363887207

0.6323777169466336 0.3214869148604128 0.6387813973119730 0.6323777169466336 0.3214869148604128 0.6387813973119730

0.8809657054859112 0.7968764972399236 0.6450668441235287 0.8809657054859112 0.7968764972399236 0.6450668441235287

0.1229226237045210 0.190470292641281 0.3563592593766082 0.1229226237045210 0.190470292641281 0.3563592593766082

0.1195527564992917 0.1984539875786201 0.8080179150262844 0.1195527564992917 0.1984539875786201 0.8080179150262844

0.8723010717478031 0.8164328548582716 0.528213923668351 0.8723010717478031 0.8164328548582716 0.528213923668351

0.1286577117780298 0.81643136386244 0.5284269180162540 0.1286577117780298 0.81643136386244 0.5284269180162540

0.8784325129414123 0.201559484954442 0.8079006856674236 0.8784325129414123 0.201559484954442 0.8079006856674236

0.8754039486360844 0.191593805034447 0.3559332137142528 0.8754039486360844 0.191593805034447 0.3559332137142528

0.139610788337754 0.7962985810915929 0.645191312250771 0.139610788337754 0.7962985810915929 0.645191312250771

0.362146918177481 0.3148590847307270 0.9720541851552659 0.362146918177481 0.3148590847307270 0.9720541851552659

0.62112861726731 0.680106053385305 0.1414021500380899 0.62112861726731 0.680106053385305 0.1414021500380899

0.3801123861726731 0.2983352988830871 0.187784040229990 0.3801123861726731 0.2983352988830871 0.187784040229990

0.6194547237683674 0.296885397812928 0.1865383415215427 0.6194547237683674 0.296885397812928 0.1865383415215427

0.371559680518744 0.686827218780381 0.1410956997345824 0.371559680518744 0.686827218780381 0.1410956997345824

0.6284325215820798 0.314381379188132 0.9737236394363930 0.6284325215820798 0.314381379188132 0.9737236394363930

0.8796639845881936 0.7962123737156228 0.9779222824580268 0.8796639845881936 0.7962123737156228 0.9779222824580268

0.1189120971515374 0.197125979130088 0.1422496189467869 0.1189120971515374 0.197125979130088 0.1422496189467869

0.8723172108343329 0.8156421683453620 0.1943021287726506 0.8723172108343329 0.8156421683453620 0.1943021287726506

0.1284757125483713 0.8154716742440602 0.1951805842190001 0.1284757125483713 0.8154716742440602 0.1951805842190001

0.8799424983445522 0.195493313862284 0.1395750612023515 0.8799424983445522 0.195493313862284 0.1395750612023515

0.1191334179082556 0.7959480734049069 0.978985586070923 0.1191334179082556 0.7959480734049069 0.978985586070923

0.99397002005243113 0.3943259750910535 0.0900466874990557 0.99397002005243113 0.3943259750910535 0.0900466874990557

0.0002011969212245 0.603016369182358 0.9236464291139600 0.0002011969212245 0.603016369182358 0.9236464291139600

0.9995132483167409 0.6030686656058697 0.2591167550227104 0.9995132483167409 0.6030686656058697 0.2591167550227104

0.4998053541977259 0.8959544902672965 0.077576663894736 0.4998053541977259 0.8959544902672965 0.077576663894736

0.5002087892708875 0.1025085755853208 0.9091917296088604 0.5002087892708875 0.1025085755853208 0.9091917296088604

0.4992039359681502 0.1003072482511177 0.2462904669379118 0.4992039359681502 0.1003072482511177 0.2462904669379118

0.000836944141290 0.395526430088644 0.4217481642863065 0.000836944141290 0.395526430088644 0.4217481642863065

0.040754459786685 0.60311611973519 0.5892919667347693 0.040754459786685 0.60311611973519 0.5892919667347693

0.0005611579119139 0.397325930336971 0.756916843534441 0.0005611579119139 0.397325930336971 0.756916843534441

0.5001209996266520 0.8971288758276054 0.4113724476937272 0.5001209996266520 0.8971288758276054 0.4113724476937272

0.499158317593586 0.111885293492523 0.5840378880752519 0.499158317593586 0.111885293492523 0.5840378880752519

0.5002071655031340 0.897056718049492 0.7430795600800340 0.5002071655031340 0.897056718049492 0.7430795600800340

0.0999338901917435 0.3008164633885604 0.0737655480720820 0.0999338901917435 0.3008164633885604 0.0737655480720820

0.905694490491868 0.699594771357910 0.9011662757546911 0.905694490491868 0.699594771357910 0.9011662757546911

0.9053495230894221 0.699190929833253 0.2353412805211126 0.9053495230894221 0.699190929833253 0.2353412805211126

0.900006905711556 0.3006888128095341 0.07347149954699338 0.900006905711556 0.3006888128095341 0.07347149954699338

0.0944317564084892 0.6990165099537433 0.2357984975771953 0.0944317564084892 0.6990165099537433 0.2357984975771953

0.0947418180582646 0.6995127688795743 0.9022007621927962 0.0947418180582646 0.6995127688795743 0.9022007621927962

0.598404966695957 0.8008096329998877 0.0908391049539046 0.598404966695957 0.8008096329998877 0.0908391049539046

0.4049977641996667 0.1987155431795485 0.9307152885626907 0.4049977641996667 0.1987155431795485 0.9307152885626907

0.406363839477055 0.1991466384291504 0.261270982647280 0.406363839477055 0.1991466384291504 0.261270982647280

0.4016213170576851 0.8007424759168770 0.09299548483463958 0.4016213170576851 0.8007424759168770 0.09299548483463958

0.5927440769206631 0.19887428395949363 0.2613846196270905 0.5927440769206631 0.19887428395949363 0.2613846196270905

0.5944225496123953 0.19949852604028231 0.9297026440431492 0.5944225496123953 0.19949852604028231 0.9297026440431492

0.1006427618706491 0.3010701544094453 0.4124265380329390 0.1006427618706491 0.3010701544094453 0.4124265380329390

0.9081733488229878 0.7007661831109317 0.5887985706608648 0.9081733488229878 0.7007661831109317 0.5887985706608648

0.0964414842957703 0.30179162008155473 0.7386361032576901 0.0964414842957703 0.30179162008155473 0.7386361032576901

0.9041740671708660 0.301977330574442 0.7368311113709506 0.9041740671708660 0.301977330574442 0.7368311113709506

0.0933163500110597 0.7003999406714760 0.5686417875201102 0.0933163500110597 0.7003999406714760 0.5686417875201102

0.8982066541837882 0.3020840819528862 0.4116915241710332 0.8982066541837882 0.3020840819528862 0.4116915241710332

0.5978682472038404 0.8015815513336062 0.4256475298975365 0.5978682472038404 0.8015815513336062 0.4256475298975365

0.3879082623636943 0.19623075046956 0.5939335157751900 0.3879082623636943 0.19623075046956 0.5939335157751900

0.5985840425883067 0.8020282212605679 0.7576328676812776 0.5985840425883067 0.8020282212605679 0.7576328676812776

0.4021036430126309 0.80185322764669833 0.7583892082804589 0.4021036430126309 0.80185322764669833 0.7583892082804589

0.6145613042997853 0.1942959008597396 0.5880863672247937 0.6145613042997853 0.1942959008597396 0.5880863672247937

0.4025319558399310 0.8014945669223101 0.4256358130253036 0.4025319558399310 0.8014945669223101 0.4256358130253036

0.000179667752276 0.2056642698849575 0.0769565832177036 0.000179667752276 0.2056642698849575 0.0769565832177036

0.9999814302000991 0.7980764900783645 0.9135757003571272 0.9999814302000991 0.7980764900783645 0.9135757003571272

0.0001026005152905 0.7977547185705266 0.2463197383904938 0.0001026005152905 0.7977547185705266 0.2463197383904938

0.4999110131107587 0.7043730467189306 0.0907766569336452 0.4999110131107587 0.7043730467189306 0.0907766569336452

0.499776915553606 0.297987861556387 0.9232696755641941 0.499776915553

0.3059941631422805 0.6864110451482005 0.6548842811544857 0.6646166734841262 0.0719656898767434 0.4133263109133638  
0.27026953521337235 0.3098573248999726 0.3413392452884171 0.8333776919474754 0.5730961700421136 0.4159576721142931  
0.8048485801666750 0.8049690408205791 0.3479754442533791 0.1729589851379231 0.4122980214116881 0.58253393895794134  
0.1942317888720310 0.18455416630286836 0.6497547519751122 0.8332038964785875 0.5736456451529997 0.7487317959944456  
0.1860092109962038 0.1835010543338838 0.5124104286798612 0.1666472422066912 0.574210572109693 0.750860949423139  
0.798033267786335 0.8129326675794443 0.8189295265588464 0.8185739292096571 0.4100865402020492 0.5811058318369634  
0.1992562417344297 0.8117811328891224 0.8201510371202607 0.1673692220226318 0.5729113072151296 0.4171365850448781  
0.8011692585116483 0.1891942344889666 0.5127061816680087 0.3751542052916220 0.0814509258960070 0.30576536525100  
0.7984697790770311 0.1867490967620569 0.6498966394495215 0.6274061374852264 0.9038025669529330 0.6906378897653187  
0.1941194601942372 0.8036566956669149 0.3495154965097945 0.6174515885981804 0.9147240730050700 0.4763708064058972  
0.2939745155116147 0.3098999934457933 0.6809830713927264 0.3698375222446035 0.1038194123312351 0.8558037365913749  
0.6925838632623783 0.6870859855465422 0.3200055834031439 0.6247862431082783 0.1045404731001966 0.8539362470406791  
0.6991739730219902 0.6878581236487938 0.8494652917901492 0.3844772179444054 0.9139572247336322 0.4780022789931119  
0.294942215697959 0.3026411154448303 0.4843172045552205 0.3702965713973116 0.9035423953773009 0.6929922017030038  
0.6952278794168755 0.3088915116606120 0.4802079243848519 0.6174303696218684 0.079683148897802 0.3038225462836609  
0.2999348698576764 0.68675998575624052 0.8503628267362420 0.8699605527277545 0.603839320799361 0.307677632938407  
0.3058258952583616 0.684837576342178 0.3213681066883602 0.1113615518490077 0.4169108669582614 0.6885394434277796  
0.6994360834897704 0.3133118697132902 0.6806126863998766 0.1229987857167394 0.4089187025538877 0.4735801813970265  
0.8044317880386207 0.805801905979390 0.6816161626487658 0.8823469823320624 0.5810698696239359 0.8581344765501173  
0.1946017959553547 0.1845793669684976 0.3160473311400799 0.1161276859446466 0.5822728871143866 0.8588680194981462  
0.1910692568302721 0.1881335765270859 0.8467525936881445 0.8728048603886921 0.4084255905164123 0.4734241335237888  
0.7995386936835608 0.8127613496274442 0.485253527326523 0.8875911792910648 0.416980525851779 0.6845189166786361  
0.199734200741687 0.8121779325170372 0.4864652548071184 0.1286692144927170 0.6012685806186531 0.3088024220292117  
0.8015710911769156 0.1887944308203016 0.8437627799901184 0.3769046413511408 0.0788310557405540 0.6392700113952196  
0.8007882315842439 0.1848932421315347 0.3124920001056258 0.6296961721631964 0.9025711057115310 0.3588110897934038  
0.1929352076758026 0.803838277023666 0.6830637556031189 0.6107075164465478 0.9165703940536318 0.80859247042321  
0.0834069776985448 0.3778711980570261 0.0802071982029113 0.3699836186417544 0.1054196474802530 0.523570864415041  
0.9138366309542820 0.6220073197132222 0.9141256205206534 0.6178797600034606 0.0960983233676358 0.51978630602568195  
0.9143310225106740 0.6211520134898492 0.2476298590460871 0.3824100507908058 0.9173397365186862 0.8101766702716082  
0.9115553354385227 0.3779821518822573 0.0786930572938764 0.3713043355167728 0.9043612209978353 0.36011553351651972  
0.0847174478877663 0.6207976353837097 0.2490452432096104 0.6175463191740573 0.0779345511718782 0.6362993541585795  
0.0841991405767127 0.6220830640981038 0.9153821990627148 0.8698756147797078 0.6047035892834740 0.6405869558173203  
0.5852059755820617 0.8785996552688491 0.0834810069429122 0.1153634520974384 0.4103061385681953 0.3554238010843453  
0.4126264225632900 0.1214362876272418 0.916527353896745 0.1285215514602476 0.4027653852587708 0.805642131435202  
0.4109433548919399 0.12011584424104594 0.2503686240579309 0.8857912877647607 0.5829984648329908 0.5242502625108036  
0.4131755139913676 0.87860166464535240 0.0852826148301923 0.11732626671237939 0.5827167936960193 0.5259678894355437  
0.5812982370555950 0.1186464130021166 0.2487789740559615 0.8651543149751962 0.4037801392800161 0.8012900112923441  
0.5835933203467071 0.1220708651380971 0.9152669961995377 0.8809295862973588 0.4148870434826876 0.3548911815675496  
0.084229899298594 0.3277632967891105 0.4158021081629454 0.1310429128913305 0.60599497933254535 0.6417959772668156  
0.9157465441702989 0.6220739621290 0.5816243864250735 0.3788195451860781 0.0802120917952452 0.9718891473244642  
0.83198959036471 0.3791682683858779 0.7478145936967664 0.616720720759665 0.8133838795394272 0.1427022980292963  
0.9125107280101248 0.3795015215543625 0.7448496552235412 0.3689899498295611 0.103563951487224 0.1891433854966846  
0.0856692452398630 0.6232685921373521 0.582275863953679 0.6206096072379631 0.1000978371452741 0.1086866562591293  
0.9102101721147171 0.378583589118697 0.4143953774959215 0.382477780165243 0.9158129033147332 0.1438827636851603  
0.5864853205728338 0.8786510801896158 0.4175802582163942 0.6181128744349894 0.0808990003677873 0.969674145077538  
0.411494951107790 0.1219156642487145 0.5856569797652890 0.8693810138737790 0.6047156053917081 0.97415035092334161  
0.5855895558749906 0.8800273501113478 0.7500454609957921 0.1264237903279954 0.4025647941264155 0.1388506433019194  
0.4135394487006771 0.8800735405489496 0.7517996404962086 0.8824996568794021 0.5803064571268268 0.1916552071537373  
0.5829673211006656 0.1214235811971241 0.5823730939799981 0.1162651313863048 0.5811417851551877 0.1923184213216383  
0.4147158965545057 0.8789471075851675 0.4182337567607542 0.8662266647346727 0.4047736873840388 0.13526585104623255  
0.0836735920632606 0.2223621837953833 0.0791949044404788 0.1283370678505746 0.6032909331945489 0.9752442004897025  
0.9132289607065636 0.7771193597528615 0.9130669062858420 0.2401223142324004 0.1201825615335562 0.3345304488025599  
0.9142013578450374 0.7761315247621159 0.2463884626501803 0.7678404741769292 0.8753766751027833 0.6677541122420663  
0.9116064981418076 0.2206615912042424 0.0768906295586821 0.7576859794959747 0.8823116730431283 0.4874807128973530  
0.0851219512333039 0.7761936443300136 0.2477753150699720 0.2306416847197007 0.1218658893596437 0.8237868812339667  
0.0840062787442213 0.7773492321113631 0.9145670331803506 0.7620530084075664 0.12230683815620136 0.8178350908374881  
0.5849522536322109 0.7226511419856516 0.0857984908051719 0.2447720906709824 0.8802730607697249 0.4889003452057605  
0.412005721026378 0.2766263311259018 0.9194086756581777 0.2308331028027584 0.6335503395357949 0.668071842705620  
0.4129323743418675 0.002305739220547 0.2523720268031962 0.7204473985440451 0.123229676994142 0.330798339498524  
0.4131028689648905 0.7227784388248019 0.0874254545283866 0.7320186684713933 0.6209167790834575 0.342867928094802  
0.5836945386828182 0.2745544515825196 0.2495961230125687 0.2493318799290764 0.3784120589756127 0.6786927405002928  
0.5830567867484163 0.2774532515897888 0.9193643600224052 0.2624812742260344 0.3754937698709234 0.495655140487223  
0.0821238152889799 0.2228263820834314 0.4140009398708286 0.7494660248542206 0.6257742959968788 0.832461338984296  
0.9142886604768008 0.7780436736873403 0.5802345266283301 0.2514598049612470 0.6230230936621552 0.8348531389858307  
0.0829854597392797 0.2234973197730934 0.7464119686568410 0.7313722817827668 0.3809006866941308 0.4893115567866749  
0.9114515558087503 0.2237911356710339 0.7446071819246668 0.7491912568541359 0.3798574664938773 0.6821915740118848  
0.0847251446591773 0.7782659085066627 0.5810139884792489 0.2683687466347092 0.6166193672398835 0.3419275795135376  
0.9081307069225717 0.2239691181531174 0.4123638528927853 0.2423996060920025 0.1206292946257094 0.6648314943692389  
0.5856324518231671 0.7224471351596209 0.4195691367726840 0.7700633161801345 0.8759859323177216 0.3332000179801532  
0.4086066844007629 0.276112340716298 0.5867048081146194 0.7568936725487433 0.8826327179669832 0.8216166854096720  
0.5855336459461015 0.7239716109791522 0.7528134043266760 0.2304168468946467 0.1191106863407613 0.4912015992974878  
0.4136447427736819 0.7242579010080675 0.7540486573258494 0.75644202230000053 0.1257147537268260 0.4901005107169207  
0.4140452122790282 0.722567041363507 0.4204040405721612 0.2433391623732499 0.8803614528169200 0.8229303157998664  
0.2749163981647017 0.9953483761420673 0.9986027930444407 0.23265581731084306 0.8727926994169755 0.3339958986834095  
0.7235388151024886 0.9964033018619088 0.9968973987105765 0.75049491999553526 0.1227713411958234 0.6656588613235244  
0.7195770808181867 0.00230700394740 0.172306704849093 0.132300723207904 0.6197108036813207904 0.6756862423086522  
0.2797880211598665 0.00230739220547 0.17239663398403752 0.2554113816626162 0.3776352332986955 0.3401770527240356  
0.7828470282894601 0.5016228136456742 0.992115294358977 0.2687299541603108 0.3770047726909886 0.8318781589150631  
0.2162109020580701 0.501135989833689 0.9938277209816121 0.7514464108014475 0.6263266861737505 0.500101722023775  
0.2213683403785089 0.4963806552383254 0.1670288514746322 0.2529314857912016 0.6227974706551048 0.50083053330073343  
0.773555373337597 0.4988883264037895 0.1660797796452414 0.72680815173714348 0.3785603322033029 0.8324543728289175  
0.2727737870359070 0.9953590908264602 0.3340644836227388 0.7415310606845175 0.3805780204051571 0.334869926452150  
0.7246786045932421 0.9967058295396758 0.6647119607922776 0.2698474483744252 0.6182094602531267 0.67691030564414817  
0.7183946739983952 0.0035647884743389 0.5039562629847624 0.2448535749309065 0.1205100717094918 0.9973440811976400  
0.2796166623357099 0.0029186372851132 0.8409882810500469 0.7573168583146200 0.8816430675372799 0.155633840595515  
0.7165824605427723 0.0046882940854913 0.8393614227820104 0.2305373111666669 0.1206618210452854 0.1545353683056732  
0.2832552992555045 0.0019218268692503 0.5068806639454474 0.7584952907174578 0.1229645041711766 0.1535377940538889  
0.270232881126414 0.9950079278135058 0.6659411688488135 0.2436400849274008 0.8795038670381322 0.157822599848170  
0.7241055488185183 0.9967660158596064 0.3301113163876327 0.75164686538627377 0.1220898250653518 0.0006709925745296  
0.7806177132011294 0.5027949429790675 0.3257357104486961 0.7309839319554710 0.6189977489992385 0.0094942851005858  
0.2157373220219557 0.5017178453527978 0.6599609697564313 0.2663782398755334 0.3756539848150049 0.1654411140898888  
0.2231542241757957 0.4975315604606075 0.5020314364449587 0.7493215823319068 0.6252251610724158 0.16621289597413264  
0.7740836975880541 0.4990386769912266 0.8325859921935992 0.2517711652040582 0.6215460130414300 0.1688731143397851  
0.2217582239277981 0.497531778948983 0.8325859921935992 0.7280484228232963 0.3776770797386368 0.1678756368609375  
0.7768600837586752 0.5004122646448189 0.5023987840600033 0.26745484117112663 0.6189296573781820 0.009245999940110  
0.782840656991449 0.50223588126715544 0.6580948928325245 0.322788121773384 0.298552275297980 0.0821978005229210  
0.2163711064018681 0.499259926932400 0.3280486015326756 0.6716918973192181 0.6807354540374921 0.9173074520119592  
0.3311187137460827 0.072551702439657 0.0814677918584713 0.6716135039143677 0.6808443575099740 0.250654952006936  
0.6750698560104241 0.9124939935309237 0.9154838811344252 0.6778192361710124 0.3010570735908311 0.0810984641281294  
0.6754085927205294 0.9116099420079070 0.2495649007028397 0.3273675313851487 0.6819459558215696 0.25195384708780121  
0.6621955432097223 0.0697763750408843 0.0080884097764411 0.3275697460043351 0.6821132821017836 0.9183284451344345  
0.3246413889798557 0.9145148385540464 0.2509972058226980 0.8245101298176085 0.7990405411519942 0.0843726285050783  
0.3246494168752794 0.9119352894876570 0.916868894769259 0.1678316602204306 0.1812316033887203 0.915995336131298  
0.8332194939530082 0.573291617698197 0.0822923430369813 0.1689487051619097 0.1784767111595948 0.2477994610890903  
0.1737042682823442 0.4124310836712334 0.9151804908431471 0.1736556151654481 0.8000036611129341 0.0854073975035897  
0.1716999900248884 0.4123729699048395 0.2483108988422352 0.8286180346334378 0.1758975424501387 0.2449266960529226  
0.1664712408432595 0.5739124072713406 0.0834436634195622 0.8232076704556238 0.1778620479016221 0.9125503560745999  
0.8283603328422081 0.4166200452687585 0.2462001353948850 0.3197672203001949 0.2971636634

|                    |                     |                     |                     |                     |                     |
|--------------------|---------------------|---------------------|---------------------|---------------------|---------------------|
| 0.1658183091785954 | 0.1798139692826399  | 0.5818884916064834  | 0.4985104173627776  | 0.2976799609508600  | 0.2530268194890288  |
| 0.8243688624250025 | 0.7988598942739563  | 0.7513582817063983  | 0.9951504660040936  | 0.2107281942483529  | 0.4089717972742546  |
| 0.1723181504638979 | 0.7992914833516552  | 0.7527001450231977  | 0.9995303635002111  | 0.8000569298694806  | 0.5792270361031929  |
| 0.8245497009626892 | 0.1822451687531892  | 0.5812976278326033  | 0.9931330270917543  | 0.2046318485371937  | 0.7452425660132000  |
| 0.1723761979889832 | 0.799381180159874   | 0.4190336473089630  | 0.49935342456170863 | 0.703066401578333   | 0.423605841567015   |
| 0.2443099376282279 | 0.2501006820835531  | 0.9935175565905214  | 0.4909891829173090  | 0.300098497611939   | 0.58143394303450    |
| 0.7458490970795267 | 0.747196694599339   | 0.9978248199033903  | 0.4995325603686129  | 0.705603474686529   | 0.756698626915488   |
| 0.7453891094985216 | 0.754493194515593   | 0.1750870179584175  | 0.6270224317764189  | 0.9039802263339068  | 0.024586873887611   |
| 0.2455151626772565 | 0.2481193324144952  | 0.1710823314820623  | 0.7668934988339710  | 0.8747526502020533  | 0.0004505667282826  |
| 0.7528252161533703 | 0.2508648426649918  | 0.1713689396994751  | 0.2305297566051634  | 0.8743949149828042  | 0.0003207294519836  |
| 0.2520261543294363 | 0.7513887026649788  | 0.1743886690560131  | 0.3703135633122063  | 0.9021159341144550  | 0.0262790489516914  |
| 0.2495988662226784 | 0.7465609421127302  | 0.9979654910242647  | 0.1130812282820603  | 0.4150507436682754  | 0.0213379438322424  |
| 0.7517084600839484 | 0.25111349452269803 | 0.9904544308058990  | 0.2519646528482574  | 0.3782956175048500  | 0.0104228408021299  |
| 0.2458034526254080 | 0.2491526038588668  | 0.3230331083226896  | 0.7443252676831104  | 0.3794517001822439  | 0.0057445304492426  |
| 0.7478642289467191 | 0.7476729984666414  | 0.6631687679867166  | 0.8843527210978421  | 0.4132484376282574  | 0.0182041637853517  |
| 0.7449009298864325 | 0.7554526938706761  | 0.5079828852599967  | 0.6160850498291659  | 0.6955904719234945  | 0.0231294283125752  |
| 0.2458098463037363 | 0.2498668431266711  | 0.8398675347515746  | 0.3805237097833836  | 0.6971797932884672  | 0.0246219613288003  |
| 0.7478318080795312 | 0.2513400089042864  | 0.8388814277487600  | 0.1252040793904362  | 0.1846634253106531  | 0.0260037473722484  |
| 0.2521107985196682 | 0.7525080572912395  | 0.5077969524101399  | 0.8731782691577098  | 0.1875801750651590  | 0.0204626838269753  |
| 0.2484819623275627 | 0.7453684911850849  | 0.6655132901149278  | 0.5836779543126170  | 0.2801116812476018  | 0.5827886152702608  |
| 0.7545857185627471 | 0.2523227279905890  | 0.3163022550451022  | 0.5544340180397204  | 0.3907462986907818  | 0.3437048227740346  |
| 0.7458272293291136 | 0.7491390525680780  | 0.3301774723079029  | 0.5177860701971364  | 0.2965598270967671  | 0.3899824576375285  |
| 0.2417020726809090 | 0.2506913448339368  | 0.5584924555457482  | 0.4585348280169011  | 0.2986038057279636  | 0.456338966991159   |
| 0.2437436532754751 | 0.2486319285861062  | 0.4995710525254100  | 0.5493266876382561  | 0.3228829664293748  | 0.4618530837551541  |
| 0.7449794741525143 | 0.7552685018450137  | 0.8422253457380562  | 0.4651796051627104  | 0.4805443575941106  | 0.4672787983441198  |
| 0.2518482794328033 | 0.752604429237844   | 0.8418176219943627  | 0.4508034645405447  | 0.4059488244449317  | 0.5088300192412329  |
| 0.7524081400324745 | 0.2546679200808364  | 0.5045020744242855  | 0.389360016799235   | 0.4292456340154346  | 0.4520265847950349  |
| 0.7531033622272203 | 0.25258917960664123 | 0.6618584169725538  | 0.4928820492280799  | 0.5250031393319197  | 0.3796744475462689  |
| 0.2497175907176105 | 0.7445625654418619  | 0.3333875006184452  | 0.6505872994307830  | 0.4727994707178190  | 0.3909310252557832  |
| 0.3723203998553941 | 0.3122946292583648  | 0.3076282729424570  | 0.6227909139015390  | 0.5541223889098209  | 0.4048548673065119  |
| 0.6174334364728250 | 0.6877918383446217  | 0.6900105604468854  | 0.5102835172480601  | 0.506252169433188   | 0.2708705121025453  |
| 0.6286554760441053 | 0.6666903493299097  | 0.4733053936893725  | 0.5734874605075323  | 0.5646049914962002  | 0.2984343497047415  |
| 0.3793442558172416 | 0.2970652862740040  | 0.8550135096341699  | 0.603407318370207   | 0.4838201604364945  | 0.2839358063501775  |
| 0.6152223071598694 | 0.2995040449770802  | 0.8555121781281397  | 0.4644063213255849  | 0.4164218288888640  | 0.3358299046835479  |
| 0.3726650340691093 | 0.6882376769352732  | 0.4757106233395201  | 0.5923509654204048  | 0.4903277746007808  | 0.4516130180247306  |
| 0.3811989753870478 | 0.6994947116011312  | 0.6910047358561745  | 0.5133991788050046  | 0.4223094070556102  | 0.3648847832006474  |
| 0.6268755189271836 | 0.315521293263647   | 0.3029620887037544  | 0.4879000840384331  | 0.3915395512798727  | 0.4199734392354759  |
| 0.8797440818218750 | 0.7946881413953643  | 0.3105216460178939  | 0.4999388392029707  | 0.3238056375178965  | 0.4289192458670036  |
| 0.1230171168513516 | 0.1858055718357985  | 0.6923203810774934  | 0.4484497322615550  | 0.4293708352003881  | 0.4653129234262436  |
| 0.1104476339713851 | 0.182956592964471   | 0.474751557046165   | 0.53836939390787015 | 0.4938589472642486  | 0.364469407987873   |
| 0.8710893898808211 | 0.8162405524521836  | 0.9607114396743837  | 0.604426381818895   | 0.503238452403841   | 0.4054634912671199  |
| 0.1276971543840539 | 0.8159969576531037  | 0.862646506813632   | 0.5571218566241664  | 0.5132232678569719  | 0.3007702887398596  |
| 0.8759757395486556 | 0.1949837421397650  | 0.4737442523579809  | 0.8722041866998567  | 0.1859316740970915  | 0.6903405224872032  |
| 0.8722041866998567 | 0.1859316740970915  | 0.6903405224872032  | 0.1190244190425971  | 0.7960681898769307  | 0.3117754346453183  |
| 0.3647998545108003 | 0.3157434600567834  | 0.6384286914422471  | 0.6165280779598480  | 0.6963586378048245  | 0.3563146138100707  |
| 0.6165280779598480 | 0.6963586378048245  | 0.3563146138100707  | 0.6275252221287442  | 0.6886315957028280  | 0.8072537712385394  |
| 0.6275252221287442 | 0.6886315957028280  | 0.8072537712385394  | 0.3680106771561082  | 0.2916951233982443  | 0.5230502220252501  |
| 0.3680106771561082 | 0.2916951233982443  | 0.5230502220252501  | 0.6163088663292451  | 0.3046873659712232  | 0.5117237803220297  |
| 0.6163088663292451 | 0.3046873659712232  | 0.5117237803220297  | 0.3715435859707057  | 0.688064304522326   | 0.8080420924805635  |
| 0.3715435859707057 | 0.688064304522326   | 0.8080420924805635  | 0.3810991449764847  | 0.6952679983587415  | 0.3583415398398085  |
| 0.3810991449764847 | 0.6952679983587415  | 0.3583415398398085  | 0.6323090582012246  | 0.3218823204627215  | 0.6365680824481804  |
| 0.6323090582012246 | 0.3218823204627215  | 0.6365680824481804  | 0.879914959621319   | 0.7970517844857836  | 0.6442698379300509  |
| 0.879914959621319  | 0.7970517844857836  | 0.6442698379300509  | 0.1221229053146752  | 0.1899838523708864  | 0.35639317683445946 |
| 0.1221229053146752 | 0.1899838523708864  | 0.35639317683445946 | 0.1168010525404889  | 0.1999440146263651  | 0.8092698360300919  |
| 0.1168010525404889 | 0.1999440146263651  | 0.8092698360300919  | 0.8714557337967449  | 0.8158039924301106  | 0.5273500279043916  |
| 0.8714557337967449 | 0.8158039924301106  | 0.5273500279043916  | 0.1288795666905096  | 0.817084548899539   | 0.5294262324894419  |
| 0.1288795666905096 | 0.817084548899539   | 0.5294262324894419  | 0.8766795986363826  | 0.2015768921643028  | 0.8075724854745751  |
| 0.8766795986363826 | 0.2015768921643028  | 0.8075724854745751  | 0.877110693584044   | 0.1880677304234731  | 0.3557844224676910  |
| 0.877110693584044  | 0.1880677304234731  | 0.3557844224676910  | 0.1174524417718047  | 0.7964590037742007  | 0.6457747973684628  |
| 0.1174524417718047 | 0.7964590037742007  | 0.6457747973684628  | 0.3679637566353459  | 0.31441405958663217 | 0.9719315543489501  |
| 0.3679637566353459 | 0.31441405958663217 | 0.9719315543489501  | 0.6273995783532188  | 0.6879777818273318  | 0.1405325761135972  |
| 0.6273995783532188 | 0.6879777818273318  | 0.1405325761135972  | 0.3775029161200813  | 0.2976694946729209  | 0.1897153782524200  |
| 0.3775029161200813 | 0.2976694946729209  | 0.1897153782524200  | 0.6176409104000582  | 0.2957970709648874  | 0.1860506168036312  |
| 0.6176409104000582 | 0.2957970709648874  | 0.1860506168036312  | 0.3716845605929332  | 0.6864689744576070  | 0.1417229189060350  |
| 0.3716845605929332 | 0.6864689744576070  | 0.1417229189060350  | 0.6262820016108143  | 0.314452322975949   | 0.9728110071742964  |
| 0.6262820016108143 | 0.314452322975949   | 0.9728110071742964  | 0.8783680297034172  | 0.7954743813998018  | 0.9771419010922968  |
| 0.8783680297034172 | 0.7954743813998018  | 0.9771419010922968  | 0.1155919195884897  | 0.1983083994228447  | 0.142615027507788   |
| 0.1155919195884897 | 0.1983083994228447  | 0.142615027507788   | 0.8718790611078766  | 0.8149720089030617  | 0.1938870127436704  |
| 0.8718790611078766 | 0.8149720089030617  | 0.1938870127436704  | 0.1277752016418189  | 0.8143978347675222  | 0.1951522314335340  |
| 0.1277752016418189 | 0.8143978347675222  | 0.1951522314335340  | 0.8773131401935564  | 0.1943869018605944  | 0.1380844444031365  |
| 0.8773131401935564 | 0.1943869018605944  | 0.1380844444031365  | 0.1174454731495601  | 0.7964378091593250  | 0.9789929799846024  |
| 0.1174454731495601 | 0.7964378091593250  | 0.9789929799846024  | 0.9973976168641772  | 0.3944243001223664  | 0.0888702693382216  |
| 0.9973976168641772 | 0.3944243001223664  | 0.0888702693382216  | 0.9989595368420597  | 0.6026299706831428  | 0.9242574816822593  |
| 0.9989595368420597 | 0.6026299706831428  | 0.9242574816822593  | 0.4049592828352235  | 0.5016657430306118  | 0.2577571112386630  |
| 0.4049592828352235 | 0.5016657430306118  | 0.2577571112386630  | 0.490628252035647   | 0.8959666781761128  | 0.077308131608044   |
| 0.490628252035647  | 0.8959666781761128  | 0.077308131608044   | 0.4980540193783812  | 0.1024193765528609  | 0.9086351300437275  |
| 0.4980540193783812 | 0.1024193765528609  | 0.9086351300437275  | 0.4957722666487877  | 0.0984810676055269  | 0.2442283602846742  |
| 0.4957722666487877 | 0.0984810676055269  | 0.2442283602846742  | 0.9974175358455137  | 0.390483903883294   | 0.4194492997489239  |
| 0.9974175358455137 | 0.390483903883294   | 0.4194492997489239  | 0.0007614333878743  | 0.6033042618780305  | 0.5923033660610167  |
| 0.0007614333878743 | 0.6033042618780305  | 0.5923033660610167  | 0.9973767254425262  | 0.3964570303261155  | 0.7580690792486774  |
| 0.9973767254425262 | 0.3964570303261155  | 0.7580690792486774  | 0.5005469722485498  | 0.8963682094991102  | 0.409918581109822   |
| 0.5005469722485498 | 0.8963682094991102  | 0.409918581109822   | 0.4963294922260185  | 0.1027184441070739  | 0.5788004802227326  |
| 0.4963294922260185 | 0.1027184441070739  | 0.5788004802227326  | 0.499332578585394   | 0.8973084440160137  | 0.7436247658493896  |
| 0.499332578585394  | 0.8973084440160137  | 0.7436247658493896  | 0.0968451525294411  | 0.3002430016139191  | 0.0719658812059206  |
| 0.0968451525294411 | 0.3002430016139191  | 0.0719658812059206  | 0.9053021471586047  | 0.699368526570875   | 0.9005305716515178  |
| 0.9053021471586047 | 0.699368526570875   | 0.9005305716515178  | 0.9058278408201393  | 0.6984128119227628  | 0.2339216427712602  |
| 0.9058278408201393 | 0.6984128119227628  | 0.2339216427712602  | 0.89823559069       |                     |                     |

0.79792326680585563 0.1841484318154244 0.9824001329838784 0.1656832942288844 0.5757049882364832 0.0846566243371486  
0.1927718068023435 0.805706558473323 0.10146436662439020 0.8235424966429801 0.4148339623894299 0.2488664457156355  
0.2978339371785218 0.3094140684121379 0.3467145518677940 0.82419756680129640 0.4144349801065200 0.9159596736652067  
0.6929416248742033 0.686963370763403 0.6519741632016508 0.3271644041759271 0.0732121383598188 0.417960649972284  
0.6973456531180300 0.68079397168750931 0.5151148321494952 0.6725187267516590 0.9111312437582656 0.5425353347307280  
0.3026175668938668 0.30328239898984341 0.8188760191032629 0.3283107949053586 0.0731907800526788 0.7456597856081727  
0.6930233129781073 0.305605876805183 0.8197898837226240 0.6631579531006500 0.0711104172822340 0.7843845470110259  
0.3013739676256166 0.681148283737148 0.51262382747718695 0.32762739861770206 0.9103122780192677 0.5851178523172335  
0.3053640439470139 0.686998861806462 0.653284850890360 0.6681147850385890 0.0701462683656439 0.4153653492952161  
0.7004406550806273 0.3088918223354185 0.3436455922970374 0.8276132064133809 0.5725599625986901 0.4164347583313127  
0.8042366856771863 0.8055642123262200 0.3466404334850853 0.1660313931385596 0.4124148180050062 0.5848725253969693  
0.1953945127543061 0.18367667946496192 0.6491506915803361 0.8323669515130889 0.5728808217913044 0.7483924535809227  
0.1851442741402670 0.178846730391815 0.5121822748612037 0.1670368776351202 0.5739591553987203 0.7505271608245161  
0.7986580532182203 0.8110646677545154 0.8173842470848390 0.8268056297409677 0.4094352357022406 0.5837295939728764  
0.2004115049577798 0.809181761599234860 0.8184541456686579 0.1703533721518968 0.5720470812647304 0.4179964921790637  
0.8024034132103718 0.1827807056403262 0.5141857590002862 0.3794436642628841 0.0813535041674290 0.3095659495212684  
0.7982857008798160 0.1845339792808110 0.6504011766101374 0.6277416465979522 0.9000955300390749 0.6915233213104078  
0.1937975199657800 0.8053557364587518 0.3481365460207717 0.6127812248432226 0.9149288166451538 0.4762566360400271  
0.294356067169417 0.3093146227720738 0.6804614817538898 0.3668560038982518 0.1024222459096014 0.8580181925698383  
0.6911654258849933 0.6887631691392826 0.3181605898803276 0.6277878516599699 0.1030320792834260 0.8567064332317653  
0.6993054917585955 0.6854290786605219 0.8484948630033919 0.3871428643968624 0.9137715888535398 0.4783247291677610  
0.29455916273479116 0.29869705323265509 0.4844397926712327 0.3684606170169542 0.9002978743797160 0.6352147011793906  
0.6973486175560563 0.3027833548130671 0.4825438472855543 0.6138518345666912 0.078865180004273 0.3076970993329338  
0.300229885561386 0.6836869426241129 0.8499032159765036 0.8695345989870081 0.6007775602284634 0.308733258051179  
0.3062151538883824 0.687392002328454 0.319984129308010 0.3062151538883824 0.4170700256013674 0.6934316435798185  
0.7001414190853367 0.3109205456235492 0.6814424148531447 0.112805383701969 0.4170700256013674 0.6934316435798185  
0.8042378737656249 0.8056971008624527 0.6795252438380280 0.114783570456235492 0.4057981377025675 0.476313105409552  
0.195047086101180 0.1862247792599881 0.3163039155257594 0.8834398556271724 0.5803260544316051 0.8572449618824973  
0.1901390189517780 0.1859643239130508 0.8468528706060119 0.1169452620182306 0.5803707057230716 0.8595888172628722  
0.7986102999944229 0.8051179705483645 0.4837451572822570 0.884279847092278 0.4046964287324934 0.4766204175261257  
0.2007236486820781 0.8062876564070953 0.4855091561204384 0.8850433021723059 0.4168679126186103 0.6905654049439606  
0.803954300568817 0.1869034043069708 0.8454744298459108 0.1272636009579329 0.6017038814422588 0.3108505345523809  
0.7992226428295814 0.1835551539459699 0.3128493658184921 0.3825798233361444 0.080220543849742 0.6420507494228742  
0.1930970562795318 0.8050168006403771 0.6807300564117792 0.6295678690772503 0.9040728144932302 0.358667044828623  
0.0836492839801215 0.3765783850674819 0.0814228134485067 0.6165868939974342 0.9150303791064216 0.808917720928399  
0.9138591054246438 0.62048090188380555 0.9141190596893117 0.3629306305325691 0.1005469872570254 0.526722530814819  
0.913671977763485 0.619580886686160 0.2488144891750746 0.6254997008245783 0.0867302136844052 0.5238904413551399  
0.9119039548777994 0.3768277574803358 0.081004605068879 0.3838693117699098 0.9148453923024041 0.8119585512881753  
0.084500757406061 0.6198793803581422 0.250111532625739 0.3682680074650169 0.9051275622869147 0.3607856845249942  
0.585391674020240 0.6204350471122690 0.915762660712573 0.6109598187058248 0.0793368290968344 0.6402151895960798  
0.412863583634478 0.1205474273359408 0.9170034359989993 0.8723245581646263 0.602538878214202 0.641246883179547  
0.411851010999103 0.1186217648306588 0.2518201366190088 0.1215150035596355 0.4123919204370008 0.35783943489047  
0.4138659285967122 0.8774451604614748 0.0859382837240573 0.1270282337925863 0.3970343059783864 0.8099129961164728  
0.5815915025316200 0.1178163880075921 0.2508675178958488 0.8787740247325840 0.581764826798470 0.5247782221452122  
0.5829597253453440 0.12061034964983635 0.9162817054185934 0.1211812124383253 0.5815006313210672 0.5267057198653663  
0.0850625955446493 0.3758416466011200 0.4142854684645376 0.8670044679733891 0.3975343036723821 0.8067883017627007  
0.9145137025006259 0.62058297438560726 0.5804700108680241 0.8748109757735316 0.4176594913214433 0.3582877634069918  
0.0836770293396763 0.3761201174365915 0.7502996341957034 0.1261894671147083 0.6028140938594820 0.6431251714932382  
0.9122977907536781 0.3760491963973545 0.7483613724762718 0.3834412052619183 0.0798791348224837 0.9740638907429079  
0.0847650190308821 0.6206009902385884 0.5817889908745701 0.6173833790413746 0.9137526846827809 0.1427147667158495  
0.91116504301112723 0.37734741456356939 0.4126697369376056 0.3665022730185658 0.0998999833946054 0.1927478942200644  
0.585632062646011 0.8783347801377388 0.4164215218662972 0.6255640990592106 0.099162986076415 0.190993630297794  
0.4117840070409762 0.120131040393016 0.5842415531156575 0.3830032433992853 0.9148877252297721 0.144350219287330  
0.585037594077768 0.87759578041079527 0.7531611541818988 0.6138411916597202 0.0794836810315243 0.977500725368288  
0.4134961888795982 0.8774717303167324 0.7531611541818988 0.8688959341781302 0.6018194386512422 0.9735111491191634  
0.5824739612223524 0.1175332923334742 0.5806383091422255 0.12552217968191936 0.3987526847252018 0.1413814859104922  
0.084646587195313 0.2211009700631346 0.0789270796599515 0.8827611994475936 0.578748515419137 0.1924465289767772  
0.9137529322314111 0.7759342516599934 0.9116207202666747 0.8691920764147477 0.3900262958096663 0.1403641591564784  
0.9136672992541184 0.7748892192944852 0.2456457253034829 0.1276282409215339 0.6016653295188003 0.9758901198515269  
0.9124601286857377 0.2205102305308287 0.0774961463594245 0.2445366974743246 0.1237415329899340 0.3336698249846097  
0.0848992205295531 0.775084880751248 0.2470898022340935 0.7683245929931835 0.8763047886458829 0.665330950380296  
0.0847353428688007 0.7759031245355816 0.913198849113059 0.7479731445248068 0.8694038449942373 0.4889374367103070  
0.5849259994037107 0.7213913566472817 0.0852969702509875 0.2280101496682723 0.1185397943578154 0.8242250612989926  
0.4124192719384392 0.2756210946831700 0.9190743863953779 0.7642958297461894 0.1221981452395068 0.8191111027742607  
0.4131782991044559 0.2743511964808749 0.2525881141105732 0.2508835024576947 0.8709876563325067 0.4913183782619459  
0.4136760719747480 0.7216244682867888 0.0871952274222530 0.2289606377791548 0.8754787715520996 0.6658876505091662  
0.5832482697524582 0.2735698242728977 0.2519166188222728 0.7466522058204573 0.1250881376354481 0.3303692912982669  
0.5831663137392916 0.2757437696232189 0.9197368028653017 0.73120726030983623 0.6231117088082642 0.313682846391375  
0.0821449621308321 0.2215658639191374 0.4135171428702895 0.2508410414755330 0.3783772726329605 0.6764397600484022  
0.9141153726498668 0.776409473914994 0.5790447082574967 0.2510494474381045 0.3658430279516840 0.49923795008606841  
0.0835631303687975 0.2210513890142010 0.7461698322808691 0.7488148064374240 0.6223323603304353 0.8331528710764740  
0.9115850793299316 0.2209838888991381 0.7455101453717479 0.2533419940619446 0.6187731481070676 0.8306259249873252  
0.084270804652058 0.7763169766242695 0.580170922740012 0.7467168755844010 0.3681803479511825 0.4922858093756580  
0.9072758801495968 0.223659492285904 0.412033102652885 0.7461510984400244 0.3796370402740091 0.6789065008338801  
0.5857844763693721 0.7237331397947154 0.4186189620095631 0.2669014108299269 0.626563021275249 0.3420128989828042  
0.4094848764960325 0.275688746958012 0.5855706901979775 0.2445629284074281 0.1207570216465296 0.6622747281472051  
0.5852805401117993 0.7216544230889240 0.752748792243077 0.7702341843881892 0.8774672134048521 0.344675623217446  
0.4136784897611606 0.7215936035680723 0.7540915778167393 0.7559908577202020 0.8801621704364475 0.8221971266105456  
0.4129331808848885 0.7231478229937374 0.419729379237865 0.2225064803662406 0.1101899786764322 0.4932605274455574  
0.2775155085512605 0.9960221032483076 0.0003591419765190 0.7655294159345364 0.1147733617065447 0.493182134946558  
0.7208259557251046 0.9963315514844366 0.9981203421855070 0.2452347192728743 0.877118785196240 0.823672549926058  
0.7783417479438889 0.0011776172700004 0.1717259626631398 0.229089496081093 0.8761621107040014 0.3336894760207463  
0.2778669633479178 0.9996762987351212 0.1703018856107786 0.7464032044166068 0.1222921547841394 0.6636748059017425  
0.7794028175472378 0.5017291982253539 0.995048177763648 0.7330456760427880 0.6202779519096594 0.6732903932589160  
0.2179873211240114 0.5019306749335393 0.9964190657195215 0.2604832044166068 0.3807515847802685 0.3398729385744813  
0.2205878440628769 0.4942238450989774 0.1648000162450542 0.2678463393764045 0.3740076139061709 0.8349174183645982  
0.7763315512588448 0.4958021929447935 0.1643706294508452 0.7383301229575742 0.6119808060659785 0.5029234535632755  
0.2723760816443789 0.997668075394157 0.3320304418620983 0.2605007221500471 0.6128022140653751 0.5029271812903375  
0.7196401874189301 0.996515399046763 0.6637680048323952 0.72656574298724681 0.3770263300475904 0.835351312675631  
0.7234279210873328 0.9943794873174600 0.5007378322815931 0.7370029085074097 0.3808671386117606 0.3396593489495626  
0.2795468975426159 0.000385166320547 0.8394994343380828 0.2659713466981439 0.6200601226213905 0.6747861272476442  
0.2797700845296303 0.9955620489287201 0.5084437607382455 0.2485400157278623 0.1215802668326447 0.996660172746675  
0.2762419413295791 0.9955477741010968 0.665183672706697 0.2289567091998334 0.1188513315140641 0.1559634089615335  
0.7240160669612999 0.9978042691545786 0.3286148142015833 0.7620441863985791 0.1211177698126135 0.153054536829502  
0.7745667940602593 0.5033161456252575 0.3256104134431766 0.2447716361642148 0.876555749623709 0.1571916071607348  
0.2157697307151207 0.5015179961743046 0.6601273513837070 0.7473903381899203 0.1224853058344696 0.000368218324359  
0.220238827290334 0.4906692081319513 0.5008076106550606 0.7315104790228045 0.6209936967545375 0.0097878014909458  
0.7771240876967002 0.4963204285754219 0.8321437392700933 0.2665228619604875 0.3739717341318273 0.1652626929239293  
0.2202943837395189 0.4941053988162243 0.8327330861146863 0.7483574165569767 0.6213588873608966 0.169133027672843  
0.7791693830396111 0.4910162929351237 0.4996848926368051 0.2529753818404408 0.6185538118604668 0.1706944331372061  
0.7823274894686564 0.5016404924907277 0.6575570823814539 0.7283016375400676 0.3756751498723116 0.166990477808092  
0.2192291797129535 0.5019353779710781 0.3264931906469853 0.2659639515160029 0.6213792878228733 0.0102021216604301  
0.3319783520374349 0.0743200304982431 0.0831393596463882 0.3243250156409623 0.2975567638429075 0.0818690676001608  
0.6743547182075862 0.9122610698823796 0.9157907672348543 0.6718333351720599 0.6803546528884915 0.9163997436456768  
0.6764117192191405 0.91073438192553 0.2493222476837599 0.6694815747197285 0.6826307229413541 0.2490691724631083  
0.661322801244241 0.0700245856361511 0.0822005608047635 0.6753097664702924 0.2981016319494651 0.0819283216882400  
0.3235161308129347 0.9142295856414609 0.2508782676302701 0.3283685165315763 0.6828910328361573 0.250882026692700  
0.323959045097478 0.9119178362757576 0.9179218182568312 0.32737124230260088 0.6816999083470929 0.91813719



|                     |                    |                     |                    |                     |                     |
|---------------------|--------------------|---------------------|--------------------|---------------------|---------------------|
| 0.8243548174982428  | 0.176387683342914  | 0.9145185613112392  | 0.4026397793674710 | 0.79953748664467880 | 0.7623618434528244  |
| 0.3192536292862863  | 0.2979043955937044 | 0.4153709417170307  | 0.5968994670017568 | 0.1938535004720142  | 0.58493405055995018 |
| 0.6688912765941238  | 0.6814975023162144 | 0.5830019038384533  | 0.3976101515393752 | 0.8006272404994448  | 0.42484201103968722 |
| 0.3120627736288517  | 0.2976205796304278 | 0.7486641877517954  | 0.984069380436532  | 0.2023070859340604  | 0.0743660785074222  |
| 0.675258132018697   | 0.3981937087374518 | 0.7501234645132083  | 0.99971309109124   | 0.7968536821572761  | 0.9107199931026301  |
| 0.3290949349634630  | 0.581842425932029  | 0.5843640727097115  | 0.9952878814631837 | 0.795401136322796   | 0.2453557832231991  |
| 0.6821024030110885  | 0.2932467187073428 | 0.4121338127276985  | 0.4993199569035502 | 0.7017342556716716  | 0.0894177581851872  |
| 0.8256233307858962  | 0.1977001269757961 | 0.4158010222266495  | 0.4977100128282262 | 0.297058481963716   | 0.921303081827014   |
| 0.1648216346536364  | 0.7994141498975620 | 0.5818736376187882  | 0.4983418752196420 | 0.2965080846560307  | 0.2521802734721054  |
| 0.8233861285094706  | 0.7991860873321160 | 0.7492934408794614  | 0.9946161913171605 | 0.2113235337175094  | 0.4088744608891618  |
| 0.1741051244935617  | 0.7989972962162582 | 0.7505606999802234  | 0.9992163007417667 | 0.7988172237883356  | 0.5770982017342953  |
| 0.8279303270067175  | 0.1797958322705032 | 0.5826601519334844  | 0.9976769268979655 | 0.2026842876074089  | 0.7434013664598614  |
| 0.1729945430096703  | 0.7994838711393198 | 0.4176241788202557  | 0.4994541133840564 | 0.7071787316961979  | 0.4228822309716074  |
| 0.2444414348922771  | 0.251304551405959  | 0.9925799659843011  | 0.4920433796962863 | 0.3001617413426145  | 0.5821430533974505  |
| 0.7463599106573751  | 0.7487702604179245 | 0.9950032810303316  | 0.4995158489152199 | 0.7021824667076741  | 0.7550947981381804  |
| 0.7467889346141596  | 0.7511888096565490 | 0.171733095319408   | 0.6277773076804555 | 0.900583553128503   | 0.0249165828180147  |
| 0.2457411820383744  | 0.2463758330072562 | 0.1692667694574653  | 0.7684732504898126 | 0.8760910048448803  | 0.9995535051532416  |
| 0.7539466609086983  | 0.2489690755149618 | 0.1701697789280421  | 0.2288036033842124 | 0.8764549891621016  | 0.0011060290900356  |
| 0.2504799672929152  | 0.7482355005089706 | 0.1717127696231385  | 0.3697240243797974 | 0.8995585208762766  | 0.0270488352162390  |
| 0.2505151186861571  | 0.749187791690209  | 0.9961793961818139  | 0.1151630770152331 | 0.4156722942019904  | 0.0242664424870103  |
| 0.7523717230693424  | 0.2515093251708029 | 0.9910007244311708  | 0.2542028685857843 | 0.998080153960203   | 0.0116657649254311  |
| 0.24212999575630040 | 0.2520457117132490 | 0.3236895974949894  | 0.7419394293668404 | 0.3791327874940359  | 0.0088013987509724  |
| 0.7473598877355260  | 0.7486424403316184 | 0.6024228478578444  | 0.6810999845387912 | 0.4144092268455121  | 0.0220863724236301  |
| 0.75278402082370022 | 0.7408436623206118 | 0.50282836817404962 | 0.6163356604915132 | 0.6980186119799460  | 0.0215101911856778  |
| 0.2461947370447834  | 0.2462795330920590 | 0.8384843759361214  | 0.3804527136353902 | 0.6991178395512532  | 0.0238284967936114  |
| 0.7507999469569043  | 0.249836770487868  | 0.8401923207807995  | 0.1277656017526313 | 0.183432255630809   | 0.0268463684505532  |
| 0.2470043554647022  | 0.7418303357668323 | 0.5038836306689906  | 0.8707026299792000 | 0.1846257577940052  | 0.0233712677522926  |
| 0.2499870450705350  | 0.7480307349139451 | 0.6615454117428949  | 0.5853512860267702 | 0.2770569959860231  | 0.5831404435545081  |
| 0.7549239406335579  | 0.254093922181937  | 0.3163434481267536  | 0.4992793560792392 | 0.5525821048346955  | 0.5342411109426407  |
| 0.7442773892592317  | 0.7511458954631482 | 0.3275352645649371  | 0.4212869160877702 | 0.4122717497459125  | 0.4188720161932963  |
| 0.2413470706109514  | 0.2506764919833498 | 0.6580533830578468  | 0.3436841365326046 | 0.4618986637701704  | 0.4288585781366692  |
| 0.2417096042131599  | 0.2372398593624230 | 0.4970369089119155  | 0.3785281555352452 | 0.4164663064237331  | 0.489582883189123   |
| 0.7457704213916860  | 0.7521110105890620 | 0.8392754650737348  | 0.4925022799131492 | 0.5136873924325645  | 0.3813671834485744  |
| 0.2518239486591333  | 0.7486246342336540 | 0.8386652395531838  | 0.5041839689933675 | 0.5816250631276502  | 0.4302947328193013  |
| 0.7422156834331416  | 0.2404912924031919 | 0.5067966478081957  | 0.4186033653140660 | 0.5659002610155620  | 0.3954885401035436  |
| 0.7553934647613652  | 0.252383397003067  | 0.6611075930708510  | 0.5226109161659497 | 0.3873151646511641  | 0.5173876630235850  |
| 0.2523161692149928  | 0.7490390404858071 | 0.3304218115017941  | 0.5853537031720749 | 0.4823111077717172  | 0.4412694222792669  |
| 0.3724865583224752  | 0.3101215762400066 | 0.3076364589302639  | 0.6260634486909624 | 0.4947668610831463  | 0.5557667693717300  |
| 0.6183857710136479  | 0.6973378887913469 | 0.6897274036181479  | 0.6453338196724781 | 0.4819485310839264  | 0.5594725298106696  |
| 0.626343080575579   | 0.68488485457287   | 0.4721261043082918  | 0.4575340748504446 | 0.428134110803308   | 0.448392798198474   |
| 0.3793269601479272  | 0.2947185351315683 | 0.9545127161201047  | 0.5718530736842105 | 0.4000705869096133  | 0.4175133970518656  |
| 0.6167071438177733  | 0.2961216813282773 | 0.8558438732796674  | 0.6577575916933830 | 0.4162752327510689  | 0.6732684100513199  |
| 0.3735759589662014  | 0.6857688599851446 | 0.4743035433480460  | 0.5739385530204025 | 0.4408133113009036  | 0.503606813530664   |
| 0.3796235907762014  | 0.6982791258642135 | 0.6911412906071588  | 0.4639867556791351 | 0.5114873968073141  | 0.5230092548989691  |
| 0.6243563940360450  | 0.3103662026875113 | 0.3063169662570946  | 0.4423867616567907 | 0.5007100064048270  | 0.46704149648648788 |
| 0.8789098211271026  | 0.7961656989215534 | 0.3088629292644762  | 0.4665572539199327 | 0.5429438737314632  | 0.4156706696417127  |
| 0.1255337527903607  | 0.1827941904563444 | 0.6933698036776478  | 0.3939463871381653 | 0.444811880899349   | 0.4507309671495220  |
| 0.1097433325307007  | 0.188885065690484  | 0.4750730677206381  | 0.5720305395126178 | 0.4163157309256215  | 0.5112393369609652  |
| 0.8715839792026270  | 0.813621760154763  | 0.8584016699331742  | 0.6076144499501502 | 0.44463347733241220 | 0.5637842560806708  |
| 0.1285141158191465  | 0.8131006190289158 | 0.8605372261046322  | 0.8749856367253329 | 0.4743154617842629  | 0.5975811625584126  |
| 0.8749856367253329  | 0.1967988732664833 | 0.4743154617842629  | 0.8697320481597515 | 0.1816555956588991  | 0.6933569957343333  |
| 0.1185831690112713  | 0.7958236045483393 | 0.3109203261301119  | 0.3665635533515142 | 0.758236045483393   | 0.6393741194662750  |
| 0.6155754358685981  | 0.3129679333178680 | 0.6393741194662750  | 0.6155754358685981 | 0.6977530796319804  | 0.3550978802863463  |
| 0.6274310298911190  | 0.685193011649510  | 0.8064654290137102  | 0.6274310298911190 | 0.685193011649510   | 0.8064654290137102  |
| 0.368184659742391   | 0.294411487156333  | 0.5234730032590269  | 0.368184659742391  | 0.294411487156333   | 0.5234730032590269  |
| 0.6202047381586102  | 0.312646939390220  | 0.5166984701050183  | 0.6202047381586102 | 0.312646939390220   | 0.5166984701050183  |
| 0.372300113026562   | 0.6843224801249888 | 0.8080572294798409  | 0.372300113026562  | 0.6843224801249888  | 0.8080572294798409  |
| 0.3816775240924330  | 0.6961863868377960 | 0.357076904672325   | 0.3816775240924330 | 0.6961863868377960  | 0.357076904672325   |
| 0.6297168801294899  | 0.3154332058536122 | 0.6404468253351290  | 0.6297168801294899 | 0.3154332058536122  | 0.6404468253351290  |
| 0.8801036843527223  | 0.7968910579518829 | 0.6428654391918420  | 0.8801036843527223 | 0.7968910579518829  | 0.6428654391918420  |
| 0.1223062010675917  | 0.1876161923174076 | 0.3574979145691007  | 0.1223062010675917 | 0.1876161923174076  | 0.3574979145691007  |
| 0.1153935780484972  | 0.1981417092030046 | 0.8099515988274806  | 0.1153935780484972 | 0.1981417092030046  | 0.8099515988274806  |
| 0.8699025702782791  | 0.8127685462822460 | 0.5260681614993592  | 0.8699025702782791 | 0.8127685462822460  | 0.5260681614993592  |
| 0.1296515784154025  | 0.8131841091537029 | 0.5281616524197790  | 0.1296515784154025 | 0.8131841091537029  | 0.5281616524197790  |
| 0.8796485268758522  | 0.1995540350654708 | 0.8097733662423803  | 0.8796485268758522 | 0.1995540350654708  | 0.8097733662423803  |
| 0.8692615049393021  | 0.1861521562594583 | 0.3568572173823177  | 0.8692615049393021 | 0.1861521562594583  | 0.3568572173823177  |
| 0.1168715943607915  | 0.7962710887460063 | 0.6445835648003052  | 0.1168715943607915 | 0.7962710887460063  | 0.6445835648003052  |
| 0.3688081532204179  | 0.3139241799079596 | 0.9713383195255956  | 0.3688081532204179 | 0.3139241799079596  | 0.9713383195255956  |
| 0.6286058555515172  | 0.6845844375781365 | 0.1380771194459141  | 0.6286058555515172 | 0.6845844375781365  | 0.1380771194459141  |
| 0.3774776449651849  | 0.2957107616262329 | 0.1897107222034077  | 0.3774776449651849 | 0.2957107616262329  | 0.1897107222034077  |
| 0.6194166613282875  | 0.2937588071330629 | 0.1888057230611146  | 0.6194166613282875 | 0.2937588071330629  | 0.1888057230611146  |
| 0.3714501260202324  | 0.6842865640195503 | 0.1404474750493468  | 0.3714501260202324 | 0.6842865640195503  | 0.1404474750493468  |
| 0.6260521936315310  | 0.3129727924777755 | 0.9729924007159342  | 0.6260521936315310 | 0.3129727924777755  | 0.9729924007159342  |
| 0.8793397134482551  | 0.7966062654613774 | 0.975239437634818   | 0.8793397134482551 | 0.7966062654613774  | 0.975239437634818   |
| 0.1148152619491614  | 0.1977468679864090 | 0.1429578641281601  | 0.1148152619491614 | 0.1977468679864090  | 0.1429578641281601  |
| 0.8724927472127659  | 0.8129237032702305 | 0.1918443582639434  | 0.8724927472127659 | 0.8129237032702305  | 0.1918443582639434  |
| 0.1276677160322397  | 0.812332040705366  | 0.1943260535295042  | 0.1276677160322397 | 0.812332040705366   | 0.1943260535295042  |
| 0.8805046037003691  | 0.1944786112096487 | 0.1401797377060363  | 0.8805046037003691 | 0.1944786112096487  | 0.1401797377060363  |
| 0.1175299862223320  | 0.7970717612508062 | 0.9772649748830661  | 0.1175299862223320 | 0.7970717612508062  | 0.9772649748830661  |
| 0.9977213221710486  | 0.3937625049741439 | 0.0891149314266100  | 0.9977213221710486 | 0.3937625049741439  | 0.0891149314266100  |
| 0.999016725092360   | 0.6014063540964101 | 0.9242063740652666  | 0.999016725092360  | 0.6014063540964101  | 0.9242063740652666  |
| 0.999049331894055   | 0.6009953066808672 | 0.2585855195876734  | 0.999049331894055  | 0.6009953066808672  | 0.2585855195876734  |
|                     |                    |                     |                    |                     |                     |

0.7048543846131833 0.7114791554782139 0.8085202473654228 0.7242544567268596 0.3793818715956307 0.1910183969205951

0.2909326607851224 0.7220164975951643 0.8127597251553530 0.7243668599827680 0.3834463555003200 0.9420527142998577

0.7104230122445490 0.2880398044107051 0.4417632243581888 0.2401587469291772 0.1228000152777203 0.317162406077035

0.7105094396935375 0.2886520979883063 0.6939998376269174 0.7723080230478168 0.8781304099905893 0.6969194132540351

0.2943708926242449 0.7030237728028578 0.3067011008411387 0.7752270144713660 0.8769381534633395 0.43946513807723433

0.2130393137344276 0.2157377234926058 0.5638475866000390 0.2301007539785375 0.1173057156480030 0.8095740312622538

0.7989965306947449 0.2130597411224011 0.5681169859294863 0.7697043658478453 0.1247174943348917 0.8233894603083557

0.7157805059554702 0.7131749686835578 0.5587184215417983 0.2387225660957262 0.8730295769706825 0.4381832770328690

0.3019713445965155 0.7089419074112165 0.5600295766837191 0.2334756883046150 0.8782390663067576 0.6802097472334047

0.0662168296046018 0.2730939246348268 0.06558221349484610 0.7746595610962322 0.1221633843251998 0.3089759854409728

0.0051855763872160 0.7287130004163987 0.9329652810542680 0.7322446372391613 0.6282740526814120 0.34018434875516

0.0084612216739077 0.728245447774686 0.18138624803705473 0.2729874575985762 0.3800704769202575 0.6963900242955667

0.5046931455139579 0.7731157850823821 0.0575255406257744 0.2936299443974033 0.3811613151982479 0.4338909190269143

0.4988803659420815 0.22965547778942575 0.9409520286290289 0.7224940584886842 0.6218110516545419 0.8149656103937747

0.500206356945424 0.2215456527855126 0.1894665556623266 0.2583850525934850 0.6353324097861053 0.8214383915263488

0.0051628246473147 0.2712186618235709 0.3164461296103457 0.7279394699325279 0.3760765199999980 0.4343293999999979

0.0019345201338658 0.726506332406040 0.6813983924941334 0.7336682298407684 0.3780234551892782 0.6927912512416771

0.0058279152327313 0.7233685569964122 0.4308470552189198 0.2714660375784437 0.6199712461712874 0.3029900607672449

0.003832807826809 0.2724765557155049 0.8173270759336165 0.2437841620086990 0.1284116942889471 0.5599345200353649

0.4982432928481351 0.77529418042801115 0.3066273130673301 0.7770221980995002 0.1235811824680018 0.567289202612950

0.5028292825904918 0.2264652229617577 0.6924050502883798 0.7468950123340219 0.6268939241470144 0.570385852982858

0.556531850773476 0.212064983269510 0.43971612507890114 0.2846845608295599 0.6190908074955337 0.5631443896166040

0.4989304395744174 0.7795439346927870 0.80094876123947276 0.0941578714209633 0.2150049119940688 0.056617950133759

0.0073489986546661 0.2761313592035982 0.5671106892407735 0.9091259372116209 0.7779123153595499 0.9408754750118737

0.5092259724285786 0.7743692454448336 0.5578650790865609 0.9108565087302154 0.7743096358449223 0.192803262901451

0.4998197553970030 0.1237838573200599 0.0622567477571076 0.9085576259686281 0.226085924438133 0.057543068372315

0.50128916035382324 0.87924714693318188 0.9357066861800825 0.0958763355888532 0.7874307848197212 0.185209066282931

0.5030429569381731 0.8784765664898689 0.1814004375942598 0.0946016366462635 0.7851941123732956 0.9417050316666884

0.0055784533593034 0.6246748187884089 0.0569909425840495 0.5976055301281488 0.7208826411085182 0.067055117985987

0.0043069187709453 0.3764176070515652 0.9412724116694104 0.4070023026120167 0.2831893288962429 0.9315228929749504

0.0047289521079090 0.3732622929307070 0.1916677432714778 0.4078705633858337 0.2754352364495093 0.1820967207766563

0.5063333540452586 0.1177879385459632 0.3140788200115210 0.4119339617065513 0.7198013166759356 0.0631925221752878

0.5058130756472147 0.8793806668318096 0.6822896162972939 0.5933978767556516 0.2743316237072201 0.1822773033793451

0.5038867566971313 0.877646771725039 0.4326406056237934 0.5926591290362587 0.2812753534555285 0.933009521544025

0.5020856531208620 0.1227144952451315 0.8182061302190092 0.0935533704832088 0.2132182293170844 0.3077450914406668

0.0100608267553962 0.6218762182362610 0.3039057340427304 0.9076836564951079 0.7772035109509442 0.6914455354047367

0.0049501121721802 0.3781751851892329 0.6935360144706462 0.9132675998325983 0.7773863687747160 0.4321478059092553

0.0108714682742221 0.37474454448138706 0.4396758052195732 0.09389909988389010 0.2127733073596263 0.8070437907812795

0.0020134754186101 0.626713222865750 0.8078894173829715 0.9091847670511529 0.2212095835858670 0.8133206556059200

0.505957070848698 0.1207034628428416 0.5678557949095029 0.0903359539933434 0.7763194880599729 0.4425063700109803

0.0046801706051109 0.62203893246544 0.5569020041921610 0.0930314254745160 0.7819414238648775 0.684985671437664

0.7372513201348675 0.0039197544612654 0.9961438937958718 0.9080650644618702 0.2239661784003435 0.3067748746987990

0.7230539734180829 0.0038908550139119 0.1218718585842958 0.5924735369252476 0.7235109395626690 0.31270831306954253

0.2765607968074464 0.996055248347389 0.1139452489040175 0.412152988300495 0.2822884841647032 0.6875168297579503

0.7825613672157967 0.5151951903167361 0.9860173401726957 0.4117140621215075 0.2700111357282524 0.4291702454934181

0.2301006462736298 0.4938593477865229 0.0034877360945291 0.5922231659437671 0.7271472377969539 0.817592334903250

0.2353402346401616 0.503174436270260 0.1287765177759732 0.4061722821722655 0.725973001039480 0.8150950461627014

0.7791129527927649 0.4819945016402364 0.1086954927197169 0.5954645601559511 0.2752988991770557 0.4354573974579007

0.2740423716077027 0.0067715266949587 0.2427248179934177 0.5967745266949583 0.2782894564423963 0.6853890631826273

0.7348836493351560 0.0112288163232143 0.7463127598012593 0.4085375705791984 0.7187469952744728 0.3136005146984988

0.7373236293812850 0.997861916339196 0.3719243254232643 0.0982557665866933 0.2202879191064811 0.5607177601237572

0.2776917122941081 0.0062442736914990 0.8856759568596894 0.9126196787678815 0.2248245857521237 0.5616405654771947

0.7312711966017776 0.9904040373112487 0.8706316636277848 0.6003364727299054 0.7185635050854913 0.5680807474594801

0.2764381402725086 0.9934924534329396 0.371395988839159 0.4152842809188854 0.7229757898256546 0.5672254344247563

0.2771156004259819 0.9886873653535354 0.7573119310679238 0.25947715586091397 0.2549336093080877 0.0621311750047413

0.7415248130215000 0.9968301266421762 0.2468559968147010 0.7436644043959395 0.7531001973803208 0.9876376720261072

0.7787007783217929 0.5148938290859509 0.2310705369063150 0.7692840922220384 0.7333649481087118 0.1118278743466795

0.2330602491147998 0.5105939401944606 0.7518557978049596 0.24848139467288192 0.2259747954995041 0.128996732888776

0.2416504736469911 0.5057211702835647 0.3773466051139080 0.7663124413088557 0.471661761797329 0.137052060236300

0.7745317185928873 0.4988805071286095 0.8626785974862739 0.2465342790177348 0.7542472357027309 0.1159963603171491

0.2332810320826363 0.5059818709506431 0.8779279314642626 0.2618848111467292 0.7467018996569338 0.910566420009580

0.7720463497973625 0.4973760857333199 0.3569445546757727 0.7373432324450063 0.2614941089021875 0.030728756711462

0.7771988071790872 0.5125082652950870 0.7389434733231661 0.2569552566154566 0.2506505572133030 0.2534391022373430

0.2348573384726616 0.4818123394078189 0.2533189202539933 0.7390550237049505 0.7396799121612794 0.738468438878086

0.2716821804424740 0.0043295028140409 0.5003149382461318 0.757925020589585 0.759064580395787 0.3633525121316954

0.7338521920757972 0.004328812893606 0.4969838173176745 0.2437372795418999 0.2386971777610708 0.8814684058586366

0.7358302306578571 0.9938439511784019 0.6218805070107395 0.7643486206231992 0.2521265708967309 0.8879688018832962

0.2729698237175133 0.008325291130424 0.6293243572230074 0.2431875735750037 0.7482100881743808 0.367251166771997

0.7747500668356595 0.512996635720942 0.4907665796396633 0.2557807247104189 0.7509675077902136 0.7435202376509727

0.2355314723499797 0.4962645078522914 0.5021652078418807 0.7366100406866946 0.2574313046288328 0.2625109113655595

0.233869852978144 0.498934726534961 0.6270164264214155 0.7366281030204936 0.7550565136707769 0.2372020296736533

0.7738674326378178 0.4898796469590777 0.6152092178994294 0.2607258893026432 0.2496679992969682 0.7559799699831324

0.4099061761728213 0.0688718911901538 0.0507349268096783 0.2404709886782787 0.2526513501417093 0.37890859594141336

0.5934368110282563 0.9330586136429880 0.9418026969284886 0.7638054203043676 0.7561798804057058 0.8632030043248081

0.6013978455656871 0.9238541933025118 0.1902652853047687 0.2470272311937482 0.7761759065883652 0.8679448829919191

0.5950076991026659 0.07459902190109 0.0514077039491561 0.24848139467288192 0.2381757904534485 0.3856464326114584

0.4158845158011128 0.937906705210561 0.184508408480110 0.74168516787819329 0.2537024898529183 0.7621764315521740

0.4085505193917435 0.9301530943625681 0.9497764523579849 0.2578511052503107 0.7478072362478221 0.241631412826218

0.9108457279142687 0.5741269437570099 0.0642966312520362 0.2598427137898141 0.2610435567984739 0.50454984838685267

0.0899726596547828 0.4364652014902314 0.9338035521787265 0.7517847376774215 0.7410705492990421 0.4891731339074658

0.0915166450683365 0.4328351038704342 0.183490032201380 0.7592949805341010 0.7664175785730132 0.6143274139216247

0.0960187787769724 0.5694949909877817 0.0652849174147602 0.2491612513049375 0.2536599518216775 0.62980200195148043

0.9061632505666164 0.4191133898957180 0.1850644707390914 0.7654635843843514 0.2462430275447502 0.6367093071277932

0.9058556832323807 0.421750051211850 0.9331963033493375 0.2456507645395397 0.7500365138477421 0.6173960022574622

0.4143489213703174 0.0630700280539138 0.3103845286132789 0.2660883259359948 0.7405337655175057 0.4918311041755543

0.596738859079625 0.9338742881473230 0.6918459825243962 0.7433298876647783 0.2560277825190744 0.5116280029220456

0.5984042639099554 0.92876108198817700 0.4368122508118591 0.0119824477033790 0.309899525954549 0.1363422715439907

0.4099063068823317 0.0698824093453536 0.8122522131207378 0.0082098385509593 0.6914401966027590 0.8622991100816000

0.5947933324146026 0.0693717854315336 0.8144194728342271 0.0228005911395200 0.6650238013481838 0.2361775833131441

0.4130248577232721 0.9321828739131992 0.4418122537235017 0.0108670340473783 0.3386602015488400 0.0116718880840589

0.4113740685143839 0.93103104106767894 0.6829001400729613 0.5015430410676894 0.8376065688099881 0.1122393341293836

0.5992558747540961 0.0659988357306901 0.3034538720186563 0.49982515395011298 0.1643602281603815 0.8869501969937965

0.1089922575964234 0.5772746463676909 0.3041051412855569 0.4998354155402493 0.1823197518941208 0.2594642134484005

0.096237548164229 0.433662353834198 0.6926841041302446 0.5078586652150318 0.811615982087523 0.9874082024538340

0.1107298897692232 0.4198864840250636 0.4317248803344449 0.0966821654296670 0.30692264848020140 0.3871663267814978

0.9038320052029674 0.5805270614120956 0.814445789852892 0.0013194421919179 0.6856755516310373 0.6122677425234957

0.0890495423790588 0.5681301867708247 0.8166651911598855 0.0011954790883107 0.6611525727044398 0.4871739882546826

0.9242603314197346 0.430441447975105 0.4298227603755317 0.0010838318505727 0.3361832168667187 0.762128697732808

0.9112167358415392 0.4296265123388083 0.6853996325662001 0.4972456332865473 0.8373763928644871 0.3633181730239534

0.0965241674192984 0.561962783408214 0.311031196503319 0.4985205978183059 0.1646991592425217 0.6354878957868536

0.4147691235916995 0.0638142439991894 0.5613863774193297 0.5016944839836660 0.1804714479394852 0.5095649104763408

0.5997480496307883 0.0710554232680041 0.5649897458363762 0.5003317127222431 0.818189119119888 0.7394371010369286

0.9178629431708635 0.5632493593503997 0.5645106264274995 0.0113822923725536 0.3171332062772655 0.6364335794256947

0.1032589518954969 0.5758841430307387 0.5632542893258775 0.0141592118356564 0.6818514383176209 0.3622425124069629

0.2298873632963700 0.1141502467265990 0.0441698373630073 0.0090671497592891 0.6638745633297047 0.7374416948454587

0.7

|                    |                     |                    |                     |                    |                     |
|--------------------|---------------------|--------------------|---------------------|--------------------|---------------------|
| 0.4965500741896085 | 0.84440256488831204 | 0.8641232624709831 | 0.50780923285701820 | 0.8781675033640601 | 0.9342099198899482  |
| 0.4989786478945218 | 0.1569444749275083  | 0.1345435176375227 | 0.5102449289043002  | 0.8758930113556702 | 0.1795894705947981  |
| 0.4959912499969676 | 0.1925666244794147  | 0.0116045891663944 | 0.0138314552633408  | 0.6213825274001157 | 0.0534526331317490  |
| 0.4925216810870767 | 0.8157618149241611  | 0.2379074434345892 | 0.0080632361647270  | 0.3741292359540296 | 0.9419732493580503  |
| 0.8055299914291698 | 0.5576810607979835  | 0.4265965937814025 | 0.0114689912124850  | 0.3725690585861222 | 0.1912825562198066  |
| 0.4662981589792248 | 0.4502908238700865  | 0.5319546665347323 | 0.5052516563967888  | 0.1172476100457967 | 0.3144273226837716  |
| 0.5844512400590664 | 0.4283714097298758  | 0.3552723520809384 | 0.5107524627762572  | 0.8766000643975567 | 0.6807428474464437  |
| 0.6500277699295154 | 0.4961272800000332  | 0.4728272700000034 | 0.51130798649468473 | 0.8757775226125301 | 0.4317119650640391  |
| 0.5658714057583295 | 0.56937000225716353 | 0.4691524961270043 | 0.5091877990155372  | 0.1201649330751053 | 0.8179362383438681  |
| 0.5447836747870798 | 0.4039290667715891  | 0.4266466132155680 | 0.0104981001164769  | 0.6196749694711889 | 0.3032413673151014  |
| 0.4655997124385765 | 0.4859731564664682  | 0.3445528800924580 | 0.0126029829113234  | 0.3756304662974580 | 0.694262563083431   |
| 0.5791627520923865 | 0.4572302983335469  | 0.3208875561349638 | 0.0115973016111582  | 0.3745706861945438 | 0.4416349446180094  |
| 0.5610226727829757 | 0.5523864725334279  | 0.3498323858775095 | 0.0078163252255291  | 0.6257010476348080 | 0.8070482241828002  |
| 0.4818369126820227 | 0.5767858178104193  | 0.5805404654262115 | 0.5098373457736574  | 0.1190004586794649 | 0.5677199098128942  |
| 0.4305237949382131 | 0.4682339335346300  | 0.650715362387682  | 0.0121770834725210  | 0.6195471545417897 | 0.55402284946696905 |
| 0.4959404023235651 | 0.5360067896522088  | 0.6942649136465001 | 0.7407034715092079  | 0.0075789161931103 | 0.9909972891530368  |
| 0.5508018954816037 | 0.4509171042664535  | 0.6702950742869483 | 0.7343658201495389  | 0.9920056717987110 | 0.1161254508544820  |
| 0.6009610952408448 | 0.5587306954874853  | 0.6001955626917908 | 0.2814407645506941  | 0.9960448654682762 | 0.11283087810956396 |
| 0.5371052099117931 | 0.474845778555238   | 0.5393176909739869 | 0.7849001593423928  | 0.5126524764574135 | 0.9880599891803205  |
| 0.5715990499291408 | 0.5083722600000016  | 0.4753893600000012 | 0.2401240441178126  | 0.485794886644176  | 0.0034738863491986  |
| 0.5518897199373995 | 0.4646672699999996  | 0.4199746600000012 | 0.2419735052483415  | 0.5032219193508757 | 0.1281192217706701  |
| 0.5423304402378990 | 0.4931701256479244  | 0.3555391215485527 | 0.7865902463352826  | 0.4833159263470009 | 0.1111362000020383  |
| 0.531705320256191  | 0.5318446269029489  | 0.5934967480524461 | 0.2773811166547216  | 0.9952529323718170 | 0.2417174981098702  |
| 0.5004958683020773 | 0.4947187929354409  | 0.6556063980125135 | 0.7395292930540158  | 0.0102667302619683 | 0.7414080103262942  |
|                    |                     |                    | 0.740365263030506   | 0.9923466263940727 | 0.868295262882053   |
|                    |                     |                    | 0.2844615593781180  | 0.0036317816859003 | 0.384108753032592   |
|                    |                     |                    | 0.7398872737598869  | 0.9873915304979736 | 0.8660137270407566  |
|                    |                     |                    | 0.2839250020470363  | 0.9922727038788187 | 0.370611628102944   |
|                    |                     |                    | 0.2847461692756416  | 0.9851734079204795 | 0.7561289568115940  |
|                    |                     |                    | 0.7395325855658397  | 0.0078790036741420 | 0.2414856380224288  |
|                    |                     |                    | 0.7845646985338738  | 0.5118472678245399 | 0.2341829876448187  |
|                    |                     |                    | 0.2384334307365761  | 0.5076592314970698 | 0.7519850274601586  |
|                    |                     |                    | 0.2404953771702450  | 0.5065109612259120 | 0.3769900690233682  |
|                    |                     |                    | 0.7787972612323113  | 0.4906139175010886 | 0.8645860223954099  |
|                    |                     |                    | 0.2369221174305442  | 0.5030617150479709 | 0.8780285473754873  |
|                    |                     |                    | 0.7736787236410395  | 0.4907750381988580 | 0.3598593050006368  |
|                    |                     |                    | 0.7826406407255481  | 0.5116637134042523 | 0.7410415734666970  |
|                    |                     |                    | 0.2393131591730395  | 0.4842511971307183 | 0.2525611300070221  |
|                    |                     |                    | 0.2799142157642740  | 0.9994324277071920 | 0.499195625639365   |
|                    |                     |                    | 0.7412654634774803  | 0.0063515865469314 | 0.422524137451663   |
|                    |                     |                    | 0.7381262609899732  | 0.9876216407759969 | 0.6169529364029716  |
|                    |                     |                    | 0.2759353645492389  | 0.0048108943710004 | 0.6280472369846261  |
|                    |                     |                    | 0.7665396611711257  | 0.5108661895153687 | 0.4294896225767875  |
|                    |                     |                    | 0.2400079509244606  | 0.4921527927653998 | 0.8810958818318105  |
|                    |                     |                    | 0.2430431691953802  | 0.4972403857683237 | 0.627011112099864   |
|                    |                     |                    | 0.7878426774619595  | 0.4909431581239019 | 0.6179065430970280  |
|                    |                     |                    | 0.4145197873671512  | 0.0702062398253781 | 0.049364738341885   |
|                    |                     |                    | 0.6005706909580840  | 0.9316575192739558 | 0.9371214314808882  |
|                    |                     |                    | 0.6034077157335367  | 0.9274865417784560 | 0.1896260405868769  |
|                    |                     |                    | 0.5990865951400134  | 0.0673626457000503 | 0.056462667165168   |
|                    |                     |                    | 0.4183888401133898  | 0.9304788859458972 | 0.1790789456963093  |
|                    |                     |                    | 0.4162388144264467  | 0.9298775489334087 | 0.9494947953181142  |
|                    |                     |                    | 0.9235511865404381  | 0.5657982527312652 | 0.0605319113189659  |
|                    |                     |                    | 0.0984502178372752  | 0.4296379763932274 | 0.9354861168465133  |
|                    |                     |                    | 0.0969282708985344  | 0.4326514076089422 | 0.180827921177956   |
|                    |                     |                    | 0.1085610602909176  | 0.5706461765319538 | 0.0593387522743573  |
|                    |                     |                    | 0.9119516420494511  | 0.4170009903667207 | 0.1866308365120847  |
|                    |                     |                    | 0.9141062767501665  | 0.4250166856207773 | 0.9326896318028643  |
|                    |                     |                    | 0.9193569612805183  | 0.55735976339842   | 0.9030113650207920  |
|                    |                     |                    | 0.60159178538051413 | 0.9310068350988720 | 0.603020627063091   |
|                    |                     |                    | 0.6054268062401926  | 0.9274163815500626 | 0.4356958173494777  |
|                    |                     |                    | 0.4170071755241449  | 0.0666664591651863 | 0.8112675798282648  |
|                    |                     |                    | 0.6018014357947590  | 0.0669300247257864 | 0.8132059683113807  |
|                    |                     |                    | 0.4205909878346132  | 0.9304094733291673 | 0.4411357746494540  |
|                    |                     |                    | 0.4161170893693915  | 0.9278693302850777 | 0.6794523148788063  |
|                    |                     |                    | 0.60439240539637074 | 0.0717338622627066 | 0.3112757098711503  |
|                    |                     |                    | 0.9148089667460291  | 0.5711934473965259 | 0.3104917593310021  |
|                    |                     |                    | 0.1052510422642511  | 0.4292873965537504 | 0.689902176344294   |
|                    |                     |                    | 0.1027099059275973  | 0.4300966029516926 | 0.4323884903874427  |
|                    |                     |                    | 0.9091553308459591  | 0.5807108811164005 | 0.8160841258532905  |
|                    |                     |                    | 0.0940019103528429  | 0.5662131310290676 | 0.8156115668450554  |
|                    |                     |                    | 0.9170969126173701  | 0.4226745991961693 | 0.438837699412394   |
|                    |                     |                    | 0.9202056141055258  | 0.4295108806315546 | 0.6908396218544268  |
|                    |                     |                    | 0.1008900814205690  | 0.5633989898618827 | 0.3069893578222636  |
|                    |                     |                    | 0.412263537028650   | 0.0614062290471498 | 0.5646361615994769  |
|                    |                     |                    | 0.6053014423177854  | 0.0706717456721401 | 0.5608786015397528  |
|                    |                     |                    | 0.9238506587906621  | 0.5610939755501113 | 0.5551894701108167  |
|                    |                     |                    | 0.1091243178323828  | 0.5723737299320917 | 0.5645948007057374  |
|                    |                     |                    | 0.2345791387299804  | 0.1137707154482571 | 0.0427651889365806  |
|                    |                     |                    | 0.7741596822679095  | 0.8730227206609220 | 0.9427835034989792  |
|                    |                     |                    | 0.7827852701188230  | 0.8782477018029360 | 0.1884014925156636  |
|                    |                     |                    | 0.7739735260924439  | 0.1239248691421884 | 0.0651591992580678  |
|                    |                     |                    | 0.2429518578047989  | 0.8733589415299305 | 0.1748562095276233  |
|                    |                     |                    | 0.2364065578119126  | 0.8855731889928923 | 0.9536072415738149  |
|                    |                     |                    | 0.7481899051316261  | 0.6210398719089106 | 0.070040060497059   |
|                    |                     |                    | 0.2718555966612582  | 0.3705011581144376 | 0.9270488472060998  |
|                    |                     |                    | 0.2664359492458467  | 0.3665491270755047 | 0.1754649745913708  |
|                    |                     |                    | 0.2880192833999430  | 0.6165033020352103 | 0.0530185956159658  |
|                    |                     |                    | 0.7299751058744406  | 0.3778770116554995 | 0.1904321925696650  |
|                    |                     |                    | 0.7349029325648790  | 0.3800084967470460 | 0.9419225151100304  |
|                    |                     |                    | 0.2442115805669812  | 0.1170801236972401 | 0.3089868568510037  |
|                    |                     |                    | 0.7783840846078495  | 0.8772950596010860 | 0.6967969123712585  |
|                    |                     |                    | 0.7823587396190408  | 0.8754254484586887 | 0.4394595858406265  |
|                    |                     |                    | 0.2372116535180035  | 0.1141581384195263 | 0.8067103519603598  |
|                    |                     |                    | 0.7766360432007317  | 0.1230476383280915 | 0.8205168967611275  |
|                    |                     |                    | 0.2466340187442101  | 0.8179044573929509 | 0.438028867703548   |
|                    |                     |                    | 0.2382363731020515  | 0.8747515304688441 | 0.680076537365845   |
|                    |                     |                    | 0.7825684927825535  | 0.1227401098292901 | 0.312982792747936   |
|                    |                     |                    | 0.7379409739962076  | 0.6233393516069355 | 0.3039697932972458  |
|                    |                     |                    | 0.2829059170614077  | 0.3782975615701485 | 0.6965349345405611  |
|                    |                     |                    | 0.2803879942935979  | 0.3762404150542519 | 0.428536882431446   |
|                    |                     |                    | 0.7281808288852555  | 0.6223076395815259 | 0.8159081789541123  |
|                    |                     |                    | 0.2636795869998944  | 0.6322517150014301 | 0.8219310892876603  |
|                    |                     |                    | 0.7235186958602789  | 0.3717446474130536 | 0.4417827413603474  |
|                    |                     |                    | 0.7418311540983795  | 0.3775174873497672 | 0.6918007466459931  |
|                    |                     |                    | 0.2768404139198578  | 0.6192889921578815 | 0.3012774738278277  |
|                    |                     |                    | 0.2508301134677378  | 0.1270111912606763 | 0.5603152885261756  |
|                    |                     |                    | 0.7852357921932750  | 0.1196752091479857 | 0.5686463122363434  |
|                    |                     |                    | 0.7548488864597787  | 0.6268317989551355 | 0.5725730855496959  |
|                    |                     |                    | 0.2902926832476271  | 0.6162747445084669 | 0.5609564954614774  |
|                    |                     |                    | 0.1000983609836931  | 0.2152782859784241 | 0.0549980159261110  |
|                    |                     |                    | 0.9170292402323345  | 0.7790506519198206 | 0.937348319957480   |
|                    |                     |                    | 0.916548989029295   | 0.186055325829258  | 0.186055325829258   |
|                    |                     |                    | 0.9145768635015156  | 0.2199602212629056 | 0.060553706576451   |

Hex-2-ylum ST (TON)  
Si O Al H C  
1.0000000000000000  
14.1050000000000000  
0.0000000000000011  
0.0034000834353423  
0.0000000000000000  
17.8419999999999987  
0.0000000000000000  
0.0000000000000013  
21.02400000000000116

Si O Al H C  
95 191 1 13 6  
Selective dynamics  
Direct

|                     |                     |                     |                       |                      |                      |
|---------------------|---------------------|---------------------|-----------------------|----------------------|----------------------|
| 0.1017065456592488  | 0.7786363648684608  | 0.1854902256193427  | 1.0000000000000000    |                      |                      |
| 0.1018282918596208  | 0.7838479069038518  | 0.9418898439770951  | 14.105000000000000004 | 0.0000000000000000   | 0.0000000000000000   |
| 0.6040722652354475  | 0.7140490624676394  | 0.0613940634830840  | 0.000000000000000011  | 17.84199999999999917 | 0.0000000000000000   |
| 0.4178395059973527  | 0.2798037851706569  | 0.9341436324302640  | 0.0034000834353423    | 0.000000000000000013 | 21.02000000000000116 |
| 0.4196640896788779  | 0.7199823378868698  | 0.1811065689956771  | Si                    | Al                   | H                    |
| 0.5985192297995653  | 0.272820987275618   | 0.1835835602466849  | 95                    | 191                  | C                    |
| 0.6035991888673673  | 0.2775287096865481  | 0.9314701400712241  | 15                    | 7                    |                      |
| 0.1006365488917234  | 0.2120221739428042  | 0.3097836161830958  | Selective dynamics    |                      |                      |
| 0.9118834279903795  | 0.774057921644973   | 0.6892146096044445  | Direct                |                      |                      |
| 0.9187991494527631  | 0.7740705316345236  | 0.4339349227122445  | 0.2935693263382382    | 0.0347519655735536   | 0.0443420829508311   |
| 0.1037014608858499  | 0.2157667162358449  | 0.8107647889282783  | 0.7028073590476868    | 0.9455246738749447   | 0.9335102875361537   |
| 0.9186076009583262  | 0.2174364625405170  | 0.8108239671845932  | 0.7018275040135181    | 0.94691720870469670  | 0.1826745610885135   |
| 0.1036778592193917  | 0.7778603635843261  | 0.4378197463988883  | 0.7011867190336943    | 0.0442689892443150   | 0.0566400700058070   |
| 0.0971449063369084  | 0.7782505199229354  | 0.6816521357573340  | 0.2920566948764566    | 0.9433873287722565   | 0.1752550373398945   |
| 0.915696228060208   | 0.2251294109217080  | 0.3064845966083956  | 0.2950343218328912    | 0.9560191347257133   | 0.9485730501474606   |
| 0.6004845980922617  | 0.7219823052739349  | 0.3113445904526848  | 0.7977328606156615    | 0.5415646233415476   | 0.0564976694083647   |
| 0.4200000071557266  | 0.2793470541603905  | 0.6868563410324879  | 0.1978416945018423    | 0.4431651772899312   | 0.9330724163307293   |
| 0.4148487136519088  | 0.2657726373930464  | 0.4357971386271045  | 0.1992561945859510    | 0.4419585609278278   | 0.1820657493953837   |
| 0.5967991561485345  | 0.7264930000609532  | 0.8170636929192465  | 0.2058747560463874    | 0.5406103249333006   | 0.0582315532290078   |
| 0.4105358334532349  | 0.7231484549817309  | 0.8138507621830584  | 0.7914282873770470    | 0.4438598811948943   | 0.180902566003895    |
| 0.5997662324752020  | 0.2633708974377086  | 0.4301534175998172  | 0.7896811333750103    | 0.446269542339067    | 0.93178866069432924  |
| 0.5045521427242723  | 0.2772749466968730  | 0.686360854911815   | 0.29270333550399893   | 0.0364228724935472   | 0.303181267428930    |
| 0.4164992589706388  | 0.7165472035181185  | 0.3122062726010119  | 0.7023925834496442    | 0.9474457272665380   | 0.6847586396077655   |
| 0.1015764047580735  | 0.2154178093990011  | 0.5659638964518962  | 0.7035428200120868    | 0.9461803612737413   | 0.4332303136135702   |
| 0.9157131386523333  | 0.2248873159189697  | 0.5582869352639107  | 0.29286012534888284   | 0.0389264862605755   | 0.8128049052046400   |
| 0.6047079404958551  | 0.713793942732740   | 0.5596221446881854  | 0.7016320387615697    | 0.0435080693519704   | 0.8095272466915108   |
| 0.4200242889410571  | 0.702398479928764   | 0.5641183027424265  | 0.2936361081244375    | 0.9455096001777045   | 0.4339531658568666   |
| 0.2668894509116268  | 0.254943553895524   | 0.0066721503510434  | 0.2920925982112104    | 0.9432206406284117   | 0.6860657515428219   |
| 0.7543215124834357  | 0.7338217019154133  | 0.9873042314079603  | 0.7029993856508576    | 0.043355037128474    | 0.307227182882459    |
| 0.7660072620354854  | 0.7612593120690303  | 0.1115074607984037  | 0.7907057464174625    | 0.5418400705733398   | 0.3052866746830145   |
| 0.2524021219963026  | 0.2255978893435236  | 0.1292252798658924  | 0.2038514475834107    | 0.449823189562742    | 0.68831472725136152  |
| 0.7705596005494337  | 0.2456710430287093  | 0.1379270208954310  | 0.2011841679206725    | 0.4432578589194988   | 0.4319145900163065   |
| 0.2502626195567870  | 0.7420286973157939  | 0.1155645371570334  | 0.7904359147957900    | 0.5456750561797779   | 0.8087581314228829   |
| 0.2689847270460841  | 0.7445577948261907  | 0.9899125382618190  | 0.1989237404488128    | 0.5483754877395917   | 0.8129446009506529   |
| 0.7461276729598888  | 0.2575769389344244  | 0.0126819615642949  | 0.7944447800596323    | 0.4470337770746222   | 0.6833499741964357   |
| 0.2623893797341302  | 0.2504060152488501  | 0.2538089821861272  | 0.2020701720477853    | 0.5393695413611218   | 0.30702212438096200  |
| 0.7438430265338345  | 0.7388751441119281  | 0.7380995816210137  | 0.2954099475496670    | 0.0408521029919396   | 0.5615833150976745   |
| 0.7650177336374347  | 0.757522610239119   | 0.3631048117062344  | 0.7059879665148159    | 0.0431653780853005   | 0.5591500220387763   |
| 0.257888584862151   | 0.2313975315834426  | 0.8820301560961916  | 0.7942826677160312    | 0.5436297272670749   | 0.5580906794593967   |
| 0.6156753038373976  | 0.2487876753125156  | 0.8880400700511654  | 0.2046293254986767    | 0.5399769437451832   | 0.5586621151114848   |
| 0.252420098090738   | 0.7470232449482633  | 0.3665527871833228  | 0.2027561397131089    | 0.1971800277014706   | 0.05872710160933531  |
| 0.2571269802082807  | 0.7463086353950598  | 0.7433724747242310  | 0.7942729473795092    | 0.7825565353579932   | 0.93146602021005702  |
| 0.7431239918994772  | 0.256289094136219   | 0.263070258909507   | 0.7905557070356736    | 0.7843991347752786   | 0.1800919703250117   |
| 0.7492286792200824  | 0.7440387266282593  | 0.2369975580018010  | 0.7893607552982950    | 0.2081982392262020   | 0.0675065852789224   |
| 0.2688417912977242  | 0.2486537026189538  | 0.7569240440090464  | 0.2031044999801519    | 0.7794549630262526   | 0.1770875195946221   |
| 0.2530135045572366  | 0.2397392361640025  | 0.3796196893492838  | 0.2074011013095507    | 0.7922441172802410   | 0.934809737171749    |
| 0.7679411131936483  | 0.75784129063044203 | 0.8626567299906641  | 0.7079230394422122    | 0.7040437894839541   | 0.05570611171648620  |
| 0.2530614255013610  | 0.77388210514284205 | 0.8673590522295903  | 0.2892280927962901    | 0.2796659073125725   | 0.9371458849859029   |
| 0.7741499648566723  | 0.2413464041389880  | 0.3880136358420607  | 0.2857118511874740    | 0.2755203963155491   | 0.1839667139949454   |
| 0.7509727686896930  | 0.2546094596796146  | 0.7627292540590400  | 0.2948985236014533    | 0.7021421073934191   | 0.053318612654871041 |
| 0.2669672217919032  | 0.7490175878107885  | 0.2410108367959297  | 0.6995250818846226    | 0.2839304069216181   | 0.1922622677717171   |
| 0.257550949462999   | 0.2601698561061539  | 0.5050075568179883  | 0.70228757571363629   | 0.2848211892390373   | 0.9421797606248896   |
| 0.7562031266018006  | 0.739159265696004   | 0.4888739421119480  | 0.2013569810047159    | 0.2002969561607943   | 0.31056480595797334  |
| 0.7608838142950587  | 0.7670986565304142  | 0.6139010145026742  | 0.7880858648211266    | 0.78509670071610289  | 0.68265936806034131  |
| 0.2554554850181169  | 0.2518749042897024  | 0.6306905317259911  | 0.7919689270635708    | 0.7828114269877460   | 0.4303411174158092   |
| 0.7723873367283233  | 0.2446721993307218  | 0.6370349180770286  | 0.2036518815730074    | 0.20066163367818558  | 0.8131122113719786   |
| 0.252432935924179   | 0.7463647751915872  | 0.6174261226954939  | 0.791220135077687     | 0.2069524443246859   | 0.8184309511774693   |
| 0.2676073406347300  | 0.7385887218138733  | 0.491463318621196   | 0.2048504043165634    | 0.7805611703822368   | 0.4307723948556090   |
| 0.7407938297790000  | 0.2478856299016096  | 0.5121721038499607  | 0.20224336860129031   | 0.7796710722694824   | 0.6800167663041354   |
| 0.0171239064850882  | 0.3081254560815473  | 0.1364734450409371  | 0.784763190892630     | 0.2074011550179242   | 0.3165079740525662   |
| 0.017171349072206   | 0.6919118410874819  | 0.8599442168124188  | 0.7026993516640346    | 0.7065150846954587   | 0.3048106654333424   |
| 0.0122473298759425  | 0.660829047616328   | 0.2341806830524186  | 0.2928204946723518    | 0.2858410581696468   | 0.691551338274713    |
| 0.0078409150107016  | 0.3360199845060623  | 0.0122223275242178  | 0.2871895964372930    | 0.2796652386102100   | 0.4353014162367206   |
| 0.5177754872569608  | 0.8328536444279201  | 0.1116614275774998  | 0.7026576036391302    | 0.7075048894483681   | 0.8074857599475247   |
| 0.5071484356747308  | 0.1607364885161740  | 0.8871185455661678  | 0.2886891862414679    | 0.7131443864209868   | 0.8099799108229131   |
| 0.5022977984378001  | 0.1817914268971169  | 0.2597807291938114  | 0.6992552035618399    | 0.2776857305359012   | 0.4427317684531966   |
| 0.5165708089313034  | 0.8112183255451348  | 0.9863949123127465  | 0.7051849622262467    | 0.2836546661132408   | 0.6926962347077992   |
| 0.016940757550053   | 0.3098800737861625  | 0.3864362349724789  | 0.2896612984449908    | 0.7039923223401769   | 0.3036614076085071   |
| -0.0001217371495425 | 0.6811387663044884  | 0.6105817529230285  | 0.20693780325539941   | 0.2073350150878795   | 0.5649374231643752   |
| 0.0138902730093068  | 0.6602260468325729  | 0.485068637391182   | 0.7936045841123954    | 0.205544369464895    | 0.5679886221677514   |
| 0.0132026239937319  | 0.3330602622824307  | 0.7626525634291832  | 0.7070590940077975    | 0.7080683191547343   | 0.5574812880537242   |
| 0.5043216900224942  | 0.8351665241420235  | 0.36261590277767545 | 0.2932990123942294    | 0.7018728635708100   | 0.555404418002214    |
| 0.5097621649019174  | 0.1624458371506902  | 0.6358236974213863  | 0.9994103049612852    | 0.2666040120055204   | 0.0643637291129205   |
| 0.5005514875457339  | 0.1788767342566632  | 0.5100140290999935  | 0.0020992789190517    | 0.723800753181808    | 0.92971366992918115  |
| 0.5059667819537108  | 0.8164466530921978  | 0.7385119337674714  | 0.9961601413638388    | 0.7188053460361843   | 0.1783364693251205   |
| 0.0106723173097679  | 0.315303713089024   | 0.6364982150148948  | 0.5020962867116411    | 0.7663874922527372   | 0.05422801993014440  |
| 0.0175506244112482  | 0.682030904912006   | 0.3597699119150696  | 0.44953746821971028   | 0.2207513652770531   | 0.939703326500012    |
| 0.0129604334048069  | 0.6610308045258541  | 0.7357408748145648  | 0.4931296090573668    | 0.216616769198259    | 0.1884416224777616   |
| 0.0240760083732247  | 0.334285604952909   | 0.5111473804432870  | 0.9994939391786556    | 0.2656772967141981   | 0.3143019785534681   |
| 0.5216008709619460  | 0.8326256164284565  | 0.6132003394280868  | 0.9648706287202566    | 0.7191104821106442   | 0.71870703853423993  |
| 0.4915318246674962  | 0.1541502693844122  | 0.3846740323789058  | 0.9986637035889057    | 0.7180627539919754   | 0.4282217347646649   |
| 0.5104049169891963  | 0.1823441124900911  | 0.7613700274501597  | 0.983893789491725     | 0.2671506802873597   | 0.8156130373822774   |
| 0.5138313324057391  | 0.8124834190810662  | 0.4875103725615977  | 0.4952500403638946    | 0.7695441224290417   | 0.3042114235809600   |
| 0.0132436963019213  | 0.3094028660005050  | 0.8876284273994111  | 0.4978123942124196    | 0.2199521423261701   | 0.6911636927727703   |
| 0.0108900354217952  | 0.6845315284900650  | 0.1098083311286877  | 0.4903827493151118    | 0.2086345964268291   | 0.4384446105120621   |
| 0.0118889095767551  | 0.6617369647401016  | 0.9839380891074964  | 0.4950395348349156    | 0.7730976290966777   | 0.8074163331781581   |
| 0.0231619523794125  | 0.3351838014998363  | 0.2613001797507763  | 0.0031445447922838    | 0.2684555404646424   | 0.566249886208983    |
| 0.4982317060857869  | 0.842277493278568   | 0.8632016258560710  | 0.4999389100240269    | 0.7679751462002147   | 0.5550361959733890   |
| 0.5040937304229066  | 0.155826432468788   | 0.1349766474449105  | 0.4949480533155993    | 0.1161578075312019   | 0.0624578511473062   |
| 0.5122392643808287  | 0.                  |                     |                       |                      |                      |

|                     |                     |                     |                     |                    |                     |
|---------------------|---------------------|---------------------|---------------------|--------------------|---------------------|
| 0.2769997240446637  | 0.9831055589070237  | 0.864927783718236   | 0.59133002388388355 | 0.7125315337293132 | 0.5576428086314573  |
| 0.2696304025828019  | 0.9903690890941020  | 0.3683856888481457  | 0.4065874544229564  | 0.7154945623118721 | 0.5632889359540311  |
| 0.2685783544931278  | 0.9812556434480834  | 0.7548290676472376  | 0.2546897446889744  | 0.2505970817921223 | 0.0065998312825241  |
| 0.72957929621618    | 0.0032313062982370  | 0.240244315032041   | 0.7459390421238049  | 0.7305158460877577 | 0.9861861523860054  |
| 0.7786739115513697  | 0.5082021945269539  | 0.233738649810056   | 0.7536100413974525  | 0.756735466573089  | 0.110764066975270   |
| 0.2286203378115238  | 0.5053560646564550  | 0.7475409786472333  | 0.241211019106238   | 0.2208003693803103 | 0.1292790631396336  |
| 0.2305501554869293  | 0.4987481575954764  | 0.3735987520864019  | 0.7600038020958943  | 0.24295839532673   | 0.1363980786343781  |
| 0.7659150708085949  | 0.4846878878031622  | 0.863781276873014   | 0.2351505989901231  | 0.7382123294212348 | 0.1117976065812000  |
| 0.2258705870084129  | 0.4961678353376806  | 0.8733737049872519  | 0.2626042316733040  | 0.7405846085941775 | 0.98672721184947553 |
| 0.7590507015353970  | 0.4834616409689959  | 0.3584093681067187  | 0.7323553524014842  | 0.2516563610451543 | 0.0113113179829684  |
| 0.7728287478189472  | 0.5064854007072076  | 0.7402010229102447  | 0.2503823484795035  | 0.2487374667764803 | 0.2538960634694494  |
| 0.2283574542379975  | 0.4824320336233167  | 0.2489543569476244  | 0.7368322444392994  | 0.7341028048497731 | 0.7370009604659591  |
| 0.2672924596107493  | 0.9943529583021233  | 0.4972599221424540  | 0.7508102979436904  | 0.7543388801909218 | 0.3622061627957286  |
| 0.72804600447284501 | 0.0035480657680094  | 0.4910372451336031  | 0.2432409433265860  | 0.2269569282440077 | 0.8821706117909468  |
| 0.7274000476309140  | 0.9834186828805069  | 0.6157918714463401  | 0.7636774522014053  | 0.2441070073590471 | 0.8866093689293684  |
| 0.2638630201210157  | 0.9972313626022019  | 0.6263840546649352  | 0.2371400800270435  | 0.7445005037340365 | 0.3630673023619444  |
| 0.7618957511275135  | 0.5096958251151156  | 0.4914848521865183  | 0.2535407886216662  | 0.7390713660424645 | 0.7398453885973578  |
| 0.2274379693235353  | 0.4862920494181042  | 0.4979970577612625  | 0.7293834340900661  | 0.2509789482978144 | 0.2615431331699743  |
| 0.2295062499832540  | 0.4935850099049246  | 0.622780093375166   | 0.7382381218958174  | 0.7374012999119326 | 0.2361813762594224  |
| 0.7686702977443276  | 0.4860321116404084  | 0.6162070390739171  | 0.2545329950302144  | 0.2484851829700445 | 0.7570451340475224  |
| 0.403879167756963   | 0.0627572484727827  | 0.0499072279489951  | 0.2361960436099538  | 0.2322562462788287 | 0.3791971354663158  |
| 0.5904267315163099  | 0.9259312218451605  | 0.9380280626901368  | 0.7607934550957859  | 0.7540020427969696 | 0.8614896248926368  |
| 0.5890618148659154  | 0.9254153862482008  | 0.1887645473270019  | 0.24407040074863054 | 0.7689391645137107 | 0.8638458717508622  |
| 0.5892680036733008  | 0.0646871114925015  | 0.0556479073904558  | 0.7617702764964209  | 0.2386509213900450 | 0.3864670262173175  |
| 0.4048260299228194  | 0.9243419128680057  | 0.1772166942779398  | 0.7342466107397742  | 0.2489788702032683 | 0.7615029191117517  |
| 0.4056831776832022  | 0.9279929331212462  | 0.9459429704538802  | 0.4056831776832022  | 0.7412696511753493 | 0.2371969611433207  |
| 0.9106281806424776  | 0.5606372838243414  | 0.0580694578049857  | 0.4247451007769552  | 0.2535980665415901 | 0.5045459662781730  |
| 0.0843759036311389  | 0.4272485312523982  | 0.9315904160742842  | 0.7446839519056975  | 0.7346877984226817 | 0.4878829263133054  |
| 0.0851466032746684  | 0.4282235439736744  | 0.1801112114630813  | 0.7475027119711720  | 0.7637186471370980 | 0.6125494336205654  |
| 0.0957423804459581  | 0.5669408986954327  | 0.0589527179443258  | 0.24473450846479262 | 0.2454662286143844 | 0.6303781146721470  |
| 0.8998002778012589  | 0.4137100264616803  | 0.1852619080943685  | 0.7625889771831497  | 0.2408609907686174 | 0.6363707786151118  |
| 0.899736946589640   | 0.4195620072133299  | 0.9341808750931689  | 0.2365211365828267  | 0.7400660705160248 | 0.6142005811480956  |
| 0.405911071098030   | 0.0537536071201565  | 0.2992435097689940  | 0.2583749004815625  | 0.7366470987759094 | 0.4881668412495429  |
| 0.5900512840152120  | 0.9267319248096459  | 0.6881258706473267  | 0.7322695604256281  | 0.2436024518426309 | 0.511252651068091   |
| 0.5917035287515732  | 0.92386780704885405 | 0.4367484121913602  | 0.0047827646959443  | 0.3045367676043773 | 0.1349126541242986  |
| 0.4041943138221953  | 0.06191187090938785 | 0.80730533005042150 | 0.0049499393118662  | 0.6865253892325771 | 0.8589863426098482  |
| 0.5892421335226639  | 0.06304862354656567 | 0.81291309100114403 | 0.9957801827496870  | 0.6553342836027852 | 0.20337272017905868 |
| 0.4064385466151032  | 0.9266913145366735  | 0.43639966045428232 | 0.0015334508892285  | 0.3317284359627556 | 0.0103132351166936  |
| 0.4047192196346390  | 0.9243567714356100  | 0.6823910028550688  | 0.5087565616096799  | 0.829085703421133  | 0.01102195195685363 |
| 0.590495934353099   | 0.0637522971698180  | 0.3074098976398427  | 0.4904666847800262  | 0.1556537133126745 | 0.8856601451748090  |
| 0.9029252002906950  | 0.564716151497025   | 0.3118688340701838  | 0.4922494445785061  | 0.177765253432659  | 0.258735462533892   |
| 0.0919304754937009  | 0.4279450795860040  | 0.6883480050457030  | 0.4997908341094003  | 0.807289209623431  | 0.9851161062190499  |
| 0.0897472458485016  | 0.4232725247330206  | 0.4283187337158960  | 0.058292470058205   | 0.3014699548089042 | 0.38475314819286005 |
| 0.9002166156102939  | 0.517993809732086   | 0.8172455019481416  | 0.964497607866001   | 0.6787559797259490 | 0.694444288148950   |
| 0.0853163339581096  | 0.5637746657668453  | 0.8122244577107717  | 0.9944135990364382  | 0.6555719308556354 | 0.4843614115253003  |
| 0.9023575259937160  | 0.4121342496915353  | 0.4359727377576905  | 0.0008523954697980  | 0.3309926553208428 | 0.7605380458255056  |
| 0.9059447469571636  | 0.4237806740715954  | 0.6857724465368988  | 0.4960735439225493  | 0.8314686728416529 | 0.3609207783042585  |
| 0.0900157234912142  | 0.5600599224040560  | 0.3058314613295893  | 0.4913882172986414  | 0.1578371616969564 | 0.634571339598470   |
| 0.4101157155662933  | 0.0523255670606677  | 0.5637647444478537  | 0.4842860995973246  | 0.1713587748913007 | 0.50860013269347500 |
| 0.5951746106672321  | 0.0681078046289143  | 0.5617717616808056  | 0.4958258569812909  | 0.8111305700846689 | 0.7370980289848859  |
| 0.9088070806708779  | 0.55935958945674506 | 0.561922323993560   | 0.0037278020862898  | 0.3113460712592289 | 0.6347441083707320  |
| 0.0948798324974864  | 0.5664915068778008  | 0.5590122895972395  | 0.0049472158268575  | 0.6772347236950135 | 0.3591575263790561  |
| 0.2246917186716521  | 0.1092415292984284  | 0.042483043568147   | 0.9942794828180065  | 0.6561715727545140 | 0.7347802269265808  |
| 0.7651930386515929  | 0.8696663145869720  | 0.9417339985910624  | 0.0150939682085233  | 0.3284676444114160 | 0.5098080729216243  |
| 0.7679122764950561  | 0.8728412401695810  | 0.1881935597130416  | 0.5046735579048420  | 0.8298832152219520 | 0.61160190329697959 |
| 0.7646328852147783  | 0.1194228428426273  | 0.0653337734847071  | 0.4823384973702926  | 0.1454562727400027 | 0.3830773747140410  |
| 0.2291103726928469  | 0.8674734239726286  | 0.1740184194906097  | 0.4996520543994597  | 0.1782450529229439 | 0.759971549431756   |
| 0.2269057423635111  | 0.8809446932612932  | 0.9497708183330121  | 0.5237194622820504  | 0.6092204907742152 | 0.486054374270516   |
| 0.7360578543852572  | 0.6172103891529595  | 0.0684422408613629  | 0.9986042770697641  | 0.3061697339773189 | 0.885135972647443   |
| 0.2573102258220250  | 0.3658238033818744  | 0.9267510596300578  | 0.9955454324049178  | 0.676070440268686  | 0.1086587110429472  |
| 0.2550645658911161  | 0.3626071288618769  | 0.1737590292994647  | 0.0001794392645134  | 0.6579185207979480 | 0.983271121620568   |
| 0.2758136762262327  | 0.612546385700995   | 0.0510178185640621  | 0.0090896592704795  | 0.3306504719270887 | 0.2599779575018082  |
| 0.7181549902981802  | 0.3739339671251989  | 0.1903217374889885  | 0.4895897930094620  | 0.8383344723495617 | 0.86156297514512093 |
| 0.7202689504221172  | 0.3745299729254733  | 0.9409713518963795  | 0.4911936268791241  | 0.1517241534400135 | 0.1338312232348371  |
| 0.2311413319645380  | 0.1130480293471509  | 0.3040842389868777  | 0.4963848372106343  | 0.1833172984475178 | 0.0102105457664751  |
| 0.7669333180722235  | 0.8731845736451561  | 0.696016027635291   | 0.4912420841747987  | 0.8111437254887219 | 0.2355929536319401  |
| 0.7686898270546388  | 0.8713655053087705  | 0.4395071074345907  | 0.7863898392613896  | 0.4438665743094091 | 0.4321511844022050  |
| 0.2254445554141529  | 0.1120407434327011  | 0.8039892952488098  | 0.5904424656691137  | 0.4414068868316851 | 0.5289205103271642  |
| 0.7649726915817485  | 0.11847059083052623 | 0.8194001581969289  | 0.5228662105393952  | 0.5688527710235566 | 0.4873430950160285  |
| 0.2312874526920718  | 0.8688838248071323  | 0.4340493474903586  | 0.4125811479529766  | 0.5279980601578563 | 0.4867304371404109  |
| 0.228947775635506   | 0.8677505505262656  | 0.679289887023146   | 0.454016684330746   | 0.5343079784594863 | 0.3259126342170055  |
| 0.7671536807113127  | 0.1182140540630181  | 0.313576645256119   | 0.5679237647216669  | 0.6505740146361788 | 0.35137161787002    |
| 0.725939573122999   | 0.6181700412265674  | 0.3112565563074740  | 0.4680641232065502  | 0.6047839544916902 | 0.38704400369277793 |
| 0.2692131654986542  | 0.3749013784982791  | 0.6922861066861089  | 0.4527944331376340  | 0.5339433101537273 | 0.61095513089132368 |
| 0.2683477341627078  | 0.3689870618533667  | 0.4265155975759293  | 0.5719102673079350  | 0.559411865513947  | 0.5933276752695437  |
| 0.7307025498112329  | 0.6180753671918803  | 0.815362165973762   | 0.523733204570261   | 0.4982349821166319 | 0.343732314529667   |
| 0.2567829819315577  | 0.208955409553648   | 0.8209554090572659  | 0.5927426830865757  | 0.4027706804691383 | 0.41370397968074440 |
| 0.7068211783580286  | 0.367744719917184   | 0.4414523347153730  | 0.46769954985304254 | 0.3741062817999922 | 0.4205124274956491  |
| 0.7278637563877502  | 0.37288886527196521 | 0.6918858520262628  | 0.451008946527005   | 0.3555220109654007 | 0.5122934528787741  |
| 0.2673251713273761  | 0.61464003579390299 | 0.3021353420902435  | 0.4752958640740627  | 0.3661914993040182 | 0.5940832295979761  |
| 0.2410667346253160  | 0.1208689468848121  | 0.5601189044317418  | 0.37916638481751053 | 0.4152627914675148 | 0.5593902994696638  |
| 0.774694497978519   | 0.1155005805649525  | 0.5680648320833465  | 0.5480698473979918  | 0.4780930013737674 | 0.6396186873409875  |
| 0.7386054166847856  | 0.6228590830809420  | 0.5723795704001789  | 0.5186014549398844  | 0.4626390754241251 | 0.5390397373306098  |
| 0.2760459312901120  | 0.61172944005503684 | 0.5546778129294333  | 0.4892684542662045  | 0.5129563603101335 | 0.482888020290949   |
| 0.0886175611072514  | 0.2098163242956227  | 0.0554595326567219  | 0.49937321432606416 | 0.4910439006243834 | 0.4157007590330153  |
| 0.9088649689109245  | 0.7764926318522544  | 0.9365602108401073  | 0.4941848504204615  | 0.5514372496578502 | 0.3682710481279862  |
| 0.9043196563079990  | 0.772827071945508   | 0.1852583420513103  |                     |                    |                     |

|                     |                     |                     |                     |                     |                     |
|---------------------|---------------------|---------------------|---------------------|---------------------|---------------------|
| 0.2830969653486287  | 0.0414839895080945  | 0.8167754669578213  | 0.5842074660421613  | 0.0642510503285280  | 0.05444663519053415 |
| 0.6924806702256631  | 0.0376072704046635  | 0.8108167513823459  | 0.3963509061146396  | 0.9295811346394284  | 0.1773009048541316  |
| 0.2842940197858663  | 0.9429325177253455  | 0.4339291898056771  | 0.3945815574234186  | 0.9229890148542821  | 0.9462713421064396  |
| 0.27694056085642865 | 0.9440221928311779  | 0.69051284444867195 | 0.8987308416470413  | 0.5630662699332278  | 0.0630876171450066  |
| 0.6973889928835124  | 0.0376241028699254  | 0.3097686702943299  | 0.0822098932828490  | 0.4225202342054586  | 0.936920999408320   |
| 0.7810374933341249  | 0.0376241028699254  | 0.3047600389494498  | 0.0818834808339111  | 0.4222789308971863  | 1.1823533758214280  |
| 0.1971309588224390  | 0.4456130508951140  | 0.692284203365839   | 0.0836240652774804  | 0.5605702995211222  | 0.060864032625405   |
| 0.1926531981539145  | 0.4399650334052421  | 0.4389418872745389  | 0.8963647043544085  | 0.4120442326553566  | 0.1864163962744880  |
| 0.7820674008241651  | 0.5382414142825740  | 0.8116889870196101  | 0.8971443822199257  | 0.4180303650512557  | 0.937596864916627   |
| 0.1888405185870301  | 0.5470298800051852  | 0.8144825158376054  | 0.4013639379704219  | 0.048765762659265   | 0.3084897405890949  |
| 0.7902019079692487  | 0.4425297701871677  | 0.6831121093374669  | 0.5734930300649762  | 0.9269862723759322  | 0.6895481291814778  |
| 0.1892262515849945  | 0.5354972464200793  | 0.3091617705629691  | 0.5814889700598782  | 0.9168210646432483  | 0.4397381259616452  |
| 0.2894857821376048  | 0.0373037903935915  | 0.5635661078711893  | 0.3945678831447746  | 0.0638288616839954  | 0.8114404441161089  |
| 0.6974876208218274  | 0.0346075933115648  | 0.5610389125649397  | 0.5798730827472790  | 0.0568866172371908  | 0.8137542733018438  |
| 0.7765417692386661  | 0.5415374983946515  | 0.5595415081889590  | 0.3965393871332922  | 0.9223562277328280  | 0.4306206995762263  |
| 0.1851839413051548  | 0.5393252768057879  | 0.5646570115657831  | 0.3874436277551641  | 0.9182821586975420  | 0.6896401998705339  |
| 0.1990141365647913  | 0.1963581810979159  | 0.0603920579912310  | 0.5863556703461388  | 0.0615932235957932  | 0.3092957755853444  |
| 0.7824485577043575  | 0.7747712587441362  | 0.9324592821008559  | 0.8927826873186904  | 0.5612248537579837  | 0.3091727509743316  |
| 0.7875023440118720  | 0.7811459247926069  | 0.1798478942430917  | 0.08734435275672808 | 0.4188218375673312  | 0.697360243230254   |
| 0.7855907562574586  | 0.1997607899755921  | 0.0707657687546207  | 0.0890963207851888  | 0.4030916345485880  | 0.4224747641478098  |
| 0.1990236389984705  | 0.7798241343487115  | 0.1826447052025655  | 0.8893908483390449  | 0.5693141460297467  | 0.822559186456834   |
| 0.1957264848106642  | 0.79219256447159024 | 0.9367228150250150  | 0.0744723856710554  | 0.5592065393594863  | 0.8115782441310723  |
| 0.697272999065806   | 0.5905925574469910  | 0.0581923328697922  | 0.9008352151570214  | 0.4149017753320599  | 0.43724166280245758 |
| 0.2822032552457805  | 0.281375976779375   | 0.9388105117908135  | 0.9029619351067705  | 0.4227657818213925  | 0.6788166747345824  |
| 0.2829577389232429  | 0.2753337014451890  | 0.1850086992153263  | 0.0788052764593721  | 0.5582608538822929  | 0.2992441949948013  |
| 0.2852004959656125  | 0.7050837681222684  | 0.0559507953403060  | 0.4042162198849157  | 0.046315344834331   | 0.569255157516281   |
| 0.6962105881897996  | 0.2755416530938049  | 0.1949652267708008  | 0.5876191590881070  | 0.0615598846671112  | 0.5630094712779792  |
| 0.6953715481254503  | 0.279061650350119   | 0.9478496094596927  | 0.8869463310917703  | 0.5689959297561774  | 0.563088357166242   |
| 0.2006284735266465  | 0.2047402191654458  | 0.3144010528283246  | 0.0720862397414156  | 0.5561334660305452  | 0.5665981574020870  |
| 0.17713918926771289 | 0.7647873770766909  | 0.6851097372851074  | 0.2240218386704455  | 0.1090594976609260  | 0.043861341384034   |
| 0.7773015526161637  | 0.7738529053712027  | 0.4327903245533017  | 0.7505174641058433  | 0.8614709919578598  | 0.9412304071343291  |
| 0.1949385766520931  | 0.2037914728494518  | 0.8144341329534599  | 0.7558923973060327  | 0.8674446041162732  | 0.189081310977642   |
| 0.7826841484346204  | 0.2010183848522746  | 0.8225917657438072  | 0.7634110811880375  | 0.1107407020153010  | 0.0662983279502579  |
| 0.1922206946656721  | 0.7795134812986932  | 0.4311437710679776  | 0.224178131297465   | 0.8681165579754311  | 0.1870678597068089  |
| 0.1843378385031921  | 0.7839021290373469  | 0.6853348272140760  | 0.2139408019798591  | 0.8811119809279850  | 0.9513904748512273  |
| 0.7877636335925216  | 0.1999805604555812  | 0.318391858558924   | 0.72028058069344686 | 0.61055956767707279 | 0.070699245633026   |
| 0.6961874379713585  | 0.7017627993230815  | 0.3024503016537071  | 0.2596799163938980  | 0.3698410751902536  | 0.9314268403303020  |
| 0.2900338975915587  | 0.2839301170166371  | 0.6927853660425097  | 0.25522015253511283 | 0.3628659561896594  | 0.1738612252723920  |
| 0.2908746128644706  | 0.2834401550747135  | 0.4391774661258793  | 0.2595736126463227  | 0.616668734229746   | 0.0573611404742900  |
| 0.6897801401135210  | 0.6972480178375716  | 0.809679287473385   | 0.7126924981022565  | 0.3648405581044638  | 0.1906304064196397  |
| 0.2764030970673659  | 0.7134686464469910  | 0.811311431127009   | 0.71980501147897675 | 0.3677365705782344  | 0.9465702829314545  |
| 0.7031283692001161  | 0.269622057862180   | 0.44649039292686    | 0.2337002804547073  | 0.1180976603050503  | 0.3115820526228988  |
| 0.7016410192908660  | 0.2778386369609885  | 0.6955489516068182  | 0.7448530926038730  | 0.8634082896399458  | 0.6995030666198171  |
| 0.2832064780377740  | 0.6985710370809206  | 0.3073016389625445  | 0.7582365256288709  | 0.8632803347669416  | 0.4405773440868345  |
| 0.206332210581034   | 0.2057937007498644  | 0.5656632751390748  | 0.2157168143106759  | 0.1147624899739596  | 0.8110424296611483  |
| 0.7926044931692035  | 0.1953480707909703  | 0.5735741952157025  | 0.7556875956108489  | 0.1128142029217692  | 0.8196491944087165  |
| 0.6854090605872891  | 0.7021209584990766  | 0.559547441071199   | 0.2193399117611403  | 0.8677587104206998  | 0.4357514762564418  |
| 0.2702871688635013  | 0.7056196241515139  | 0.5607677736041288  | 0.2057742637886282  | 0.8727985950401022  | 0.6882481515044197  |
| 0.9940318454484701  | 0.261756241569311   | 0.0673805965935462  | 0.7644603623086362  | 0.1109248511159338  | 0.3172279970400097  |
| 0.9926951634069265  | 0.7203548468587235  | 0.9314078933355355  | 0.7147958011945678  | 0.6127002437160453  | 0.3088720852082000  |
| 0.9912037660540498  | 0.7203540885488212  | 0.1788550545158418  | 0.2672609549236534  | 0.373136555943616   | 0.6935781835522227  |
| 0.4930860355826889  | 0.765351125189124   | 0.0567973871079999  | 0.2747964983829378  | 0.37425533274737557 | 0.435973297962835   |
| 0.4877522044920723  | 0.2174355116365233  | 0.942941104568166   | 0.7070910069848195  | 0.6075432350827532  | 0.8174232121919686  |
| 0.4880178882322221  | 0.2116680913061128  | 0.1908444728827694  | 0.2423992760990707  | 0.62733682497241157 | 0.8209675389954464  |
| 0.9936216280017851  | 0.261868088697767   | 0.3165139322859435  | 0.7046714710559917  | 0.3609219982179151  | 0.44119898829493395 |
| 0.9809951748429822  | 0.7169418137564146  | 0.68264711611953804 | 0.7284955943364021  | 0.3660049386146351  | 0.6916004040438107  |
| 0.9890146742126571  | 0.7130394471162675  | 0.4294094128600225  | 0.2558612575876358  | 0.610143433656164   | 0.309267772287880   |
| 0.9879540298762521  | 0.2653705084575776  | 0.8191819490629333  | 0.2391516486140905  | 0.1163869220096603  | 0.5602730813737580  |
| 0.4858198098426773  | 0.7631460334101467  | 0.3027925758389082  | 0.7660178253610163  | 0.102982053099840   | 0.6691153469908507  |
| 0.4941701216436351  | 0.2160228787669381  | 0.693332330003708   | 0.7083590076488756  | 0.614627359857038   | 0.5718289849396962  |
| 0.4883963051753713  | 0.2037302148973534  | 0.4427999054569216  | 0.2455957308515105  | 0.6170175969802019  | 0.5665958792728272  |
| 0.4856121255551061  | 0.7684168675048849  | 0.8091230608331822  | 0.0843364406148798  | 0.2060561934130016  | 0.058470404506398   |
| 0.9963667080378018  | 0.2592792859752540  | 0.5716096491053501  | 0.8972932947472492  | 0.77086142339982726 | 0.9371144857232622  |
| 0.4795251961151987  | 0.7671836505982620  | 0.5582776718820713  | 0.9023263874366485  | 0.7779726949110971  | 0.1795437165487684  |
| 0.4873308690446479  | 0.1112748277328899  | 0.0648257682573801  | 0.8986271701256288  | 0.2115373452421047  | 0.0605888445152029  |
| 0.487403408350191   | 0.8713651321862410  | 0.9339323989489465  | 0.0852869985276462  | 0.7707772477175029  | 0.1892912411087496  |
| 0.4852500631228086  | 0.8720984803983851  | 0.1804529792171254  | 0.0825320336939117  | 0.7760786927920406  | 0.9417310132235137  |
| 0.9921764683459673  | 0.6149894282851482  | 0.054952901100527   | 0.5837537432095128  | 0.7099869373061316  | 0.0622064913392845  |
| 0.9917029910600519  | 0.3671727914808868  | 0.9435922074176863  | 0.3959954985546869  | 0.2705761230148861  | 0.9318674581337830  |
| 0.9938146562976532  | 0.364763296166359   | 0.1921741489774213  | 0.3979921749025172  | 0.2677969089189769  | 0.182846892946802   |
| 0.4881444496143117  | 0.1074409434367257  | 0.3147295960015028  | 0.3990950434037475  | 0.7136985340199778  | 0.0638628503302347  |
| 0.4841056326628233  | 0.8700465943703204  | 0.6832582679350739  | 0.58324117138871487 | 0.262230593290409   | 0.18442712128833513 |
| 0.4869218461126306  | 0.8663353346109421  | 0.4305714501751801  | 0.5815950184772888  | 0.2697224816770581  | 0.9392107018516492  |
| 0.4902155641100638  | 0.1132981177877201  | 0.8186413143443066  | 0.0857937480306118  | 0.2072719254857626  | 0.3111504018197536  |
| 0.9862097629412799  | 0.6122437303985838  | 0.301708773868639   | 0.8859248667925755  | 0.7678698256134571  | 0.686781913164045   |
| 0.9920315124040971  | 0.363116638879774   | 0.6938985852784804  | 0.89191251540212833 | 0.7602854264671486  | 0.4346598024264312  |
| 0.9879082260398432  | 0.3591073940576426  | 0.4444242096588987  | 0.0820090780328459  | 0.2165184083860392  | 0.8048386345763933  |
| 0.9851033799597507  | 0.6164722277930234  | 0.8081889982115424  | 0.8970126622501682  | 0.2086402230300267  | 0.8158395835435982  |
| 0.4896824307606650  | 0.107263659895041   | 0.5708572452248062  | 0.0773685698956840  | 0.7717714726112240  | 0.4332021384868600  |
| 0.9848045981071099  | 0.6148202521641053  | 0.5575490449936643  | 0.0712631691916729  | 0.7716100153773537  | 0.6947232449258178  |
| 0.7233314626539409  | 0.9958335256129991  | 0.922379796656791   | 0.8996916023162294  | 0.211808543758735   | 0.30323210412078200 |
| 0.7098385741847942  | 0.9820889421198697  | 0.11172215981850470 | 0.5829433699543652  | 0.7174219531764144  | 0.2952675336181736  |

|                    |                     |                    |
|--------------------|---------------------|--------------------|
| 0.7638820763804424 | 0.2326938266933845  | 0.3887577958255100 |
| 0.7300865807612569 | 0.2459820213280662  | 0.7653985247497382 |
| 0.2501075542443550 | 0.7335163155355213  | 0.2395630056869660 |
| 0.2513950244915537 | 0.2528340851123687  | 0.5066959970729367 |
| 0.7261879737389720 | 0.7286350417636175  | 0.4905770250673304 |
| 0.7318113177026366 | 0.7540874640882967  | 0.6150545417925932 |
| 0.2409586062256285 | 0.2428872248644638  | 0.6322217258080857 |
| 0.7553561595552337 | 0.2303030317415532  | 0.6404223984147351 |
| 0.2159562985155906 | 0.7517266984813848  | 0.6162026089382544 |
| 0.2384935445278998 | 0.7349457272954839  | 0.4909765880574870 |
| 0.7452412064228828 | 0.2412799354993626  | 0.5144149159524682 |
| 0.9980448057696916 | 0.2999466182117769  | 0.1376358278727765 |
| 0.9987846067309709 | 0.6824560419574913  | 0.8609788113388327 |
| 0.9806576785115069 | 0.6591308643217582  | 0.2354471948221373 |
| 0.9948397393987162 | 0.3266101734271623  | 0.0128832255782398 |
| 0.4960147698901340 | 0.8281310364161640  | 0.1130275066740844 |
| 0.4918286212039089 | 0.1532206876103600  | 0.8881190464121098 |
| 0.4840613136759888 | 0.1734666575636273  | 0.2613203951092971 |
| 0.4939157013153227 | 0.8061019644378270  | 0.9876660298442084 |
| 0.9894708943294609 | 0.2968888853496019  | 0.3873196908861714 |
| 0.9895728490726100 | 0.6790376327636291  | 0.6125849762615885 |
| 0.985752208576862  | 0.65353219183229252 | 0.4878121207749570 |
| 0.9745594219401052 | 0.3288710682359666  | 0.7628997724839542 |
| 0.4932820980890527 | 0.9212573006159435  | 0.3635670264457522 |
| 0.4890519677405887 | 0.1531347514027631  | 0.6376801020962247 |
| 0.4749518941727878 | 0.1654310583613800  | 0.5120548684500796 |
| 0.4893995959018320 | 0.8068835264155564  | 0.7389342517281545 |
| 0.0029989958884549 | 0.3047489061349678  | 0.6387830498269312 |
| 0.9948424892089175 | 0.6695554128472645  | 0.3617141602400036 |
| 0.9785683848488356 | 0.6520654610697137  | 0.7370999162571297 |
| 0.9831072410763017 | 0.3166358443351231  | 0.5130141036212392 |
| 0.4872240299375579 | 0.8303644996082415  | 0.6136316700591358 |
| 0.4786130702476632 | 0.1431811607989981  | 0.3857375161676881 |
| 0.4951466026122465 | 0.1760042957637081  | 0.7626182004049018 |
| 0.4756952713355100 | 0.8068062533886825  | 0.4886540942109845 |
| 0.9937178561089866 | 0.3044853028300636  | 0.8875128899010643 |
| 0.9957854774238091 | 0.6784689883165573  | 0.1102197369233517 |
| 0.9923323029315291 | 0.6547698945461237  | 0.9852708240173353 |
| 0.0011361512133845 | 0.3273512660860872  | 0.2625828438446963 |
| 0.4832426696899882 | 0.8336750751587368  | 0.8634093220872954 |
| 0.4857857546324067 | 0.1465430606898421  | 0.1364593542917704 |
| 0.4805092898955164 | 0.1785250518211672  | 0.0127931966161651 |
| 0.4676376428059644 | 0.8129600458411284  | 0.2380963956095171 |
| 0.7831498856669002 | 0.4407795529805193  | 0.4333393298917185 |
| 0.3745894121800593 | 0.4738620110848097  | 0.3912674002848094 |
| 0.6104094061279463 | 0.5970764506858713  | 0.4418636806840863 |
| 0.5254632129336134 | 0.6680832833165802  | 0.4286724429880590 |
| 0.5631269183129508 | 0.6102520534341277  | 0.3640967020476645 |
| 0.4952858138082666 | 0.5531672939354499  | 0.5297737442799512 |
| 0.3873261361133576 | 0.5074245013055618  | 0.5059588970866273 |
| 0.3969598592101954 | 0.6058845572154699  | 0.5064390879752483 |
| 0.6120181485579005 | 0.4667190037374761  | 0.4171724143650644 |
| 0.4502863542509070 | 0.4026292233733890  | 0.4802098659652976 |
| 0.4755129567409995 | 0.3538880457843582  | 0.3599163014664197 |
| 0.4517170452513550 | 0.5219730396752194  | 0.3327802430648486 |
| 0.5414395485505720 | 0.3408492457195699  | 0.4981744306578761 |
| 0.5546780230348856 | 0.4362543430357411  | 0.5204134054168585 |
| 0.5967664123927336 | 0.3343888101054615  | 0.3485835964065692 |
| 0.5528133839712284 | 0.4196221901186482  | 0.320139257346396  |
| 0.4307521177511562 | 0.5141486931854569  | 0.3822633772805267 |
| 0.4686245173869870 | 0.5566369729018457  | 0.4289137230874167 |
| 0.4355587658152074 | 0.5540091544919182  | 0.4962124037556007 |
| 0.5460315928186174 | 0.6109542742253605  | 0.4146672599680510 |
| 0.5702699547504739 | 0.4156744534766041  | 0.4208304595539078 |
| 0.5460481459270882 | 0.3793729000033933  | 0.3591457426001750 |
| 0.5278102491925761 | 0.3986429112196440  | 0.4835938983275768 |
